# Supplementary material for: SARS-CoV-2-reactive T cells in healthy donors and patients with COVID-19
Source: Springer Nature journal article supplement (doi:10.1038/s41586-020-2598-9), 2020-07-29

**Supplementary information**

---

**SARS-CoV-2-reactive T cells in healthy donors and patients with COVID-19**

---

In the format provided by the authors and unedited

# COVID-19 Patients (P)

n=18

**P1  
unstimulated**

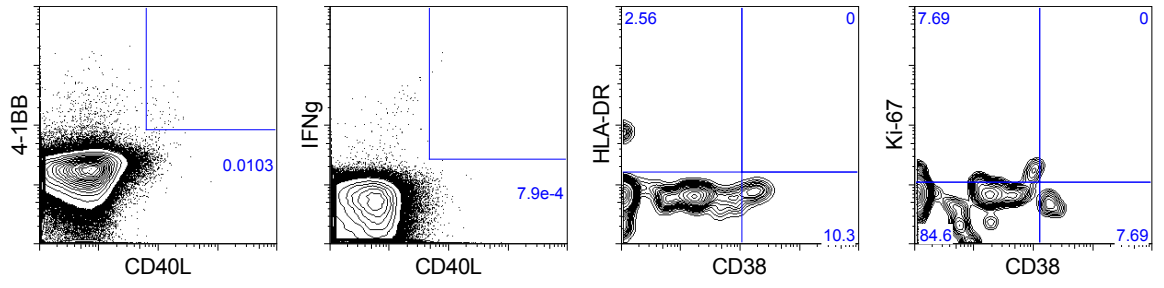

**P1  
S-I (N-term)**

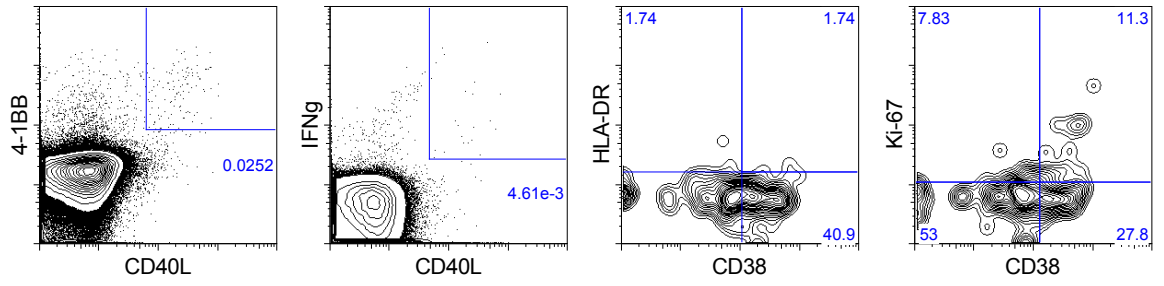

**P1  
S-II (C-term)**

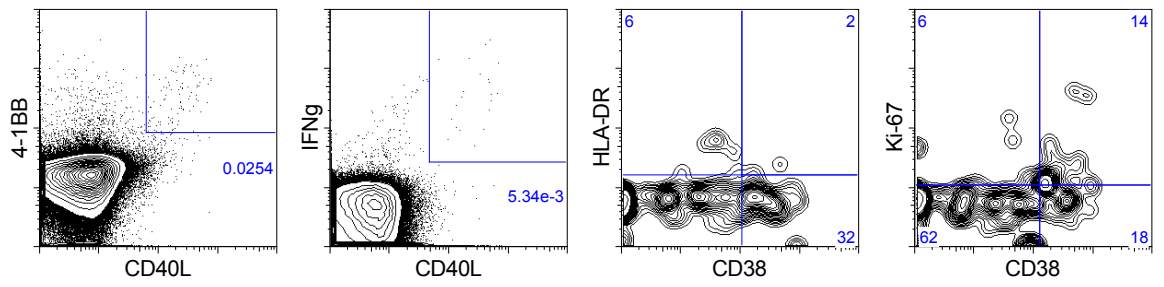

**P1  
CMVpp65**

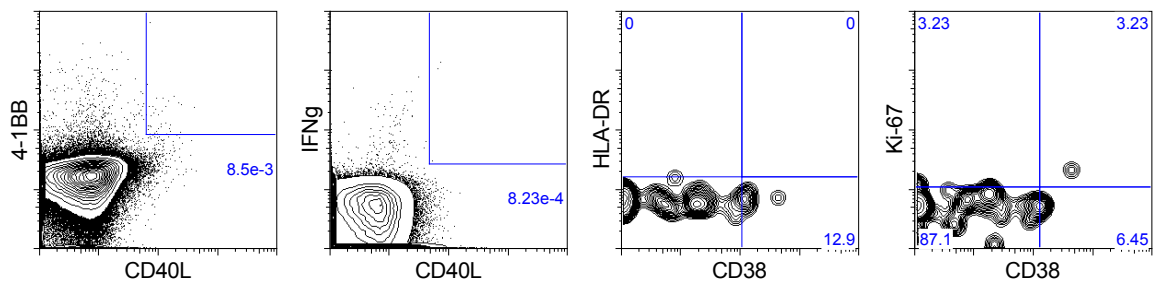

**P1  
SEB/TSST1**

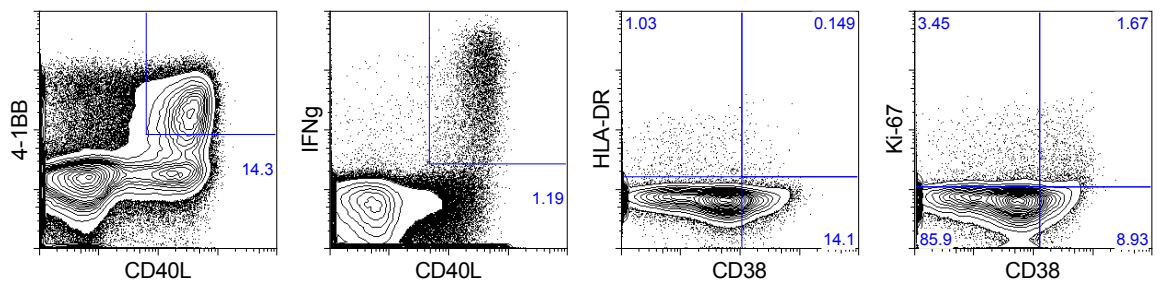

**P3  
unstimulated**

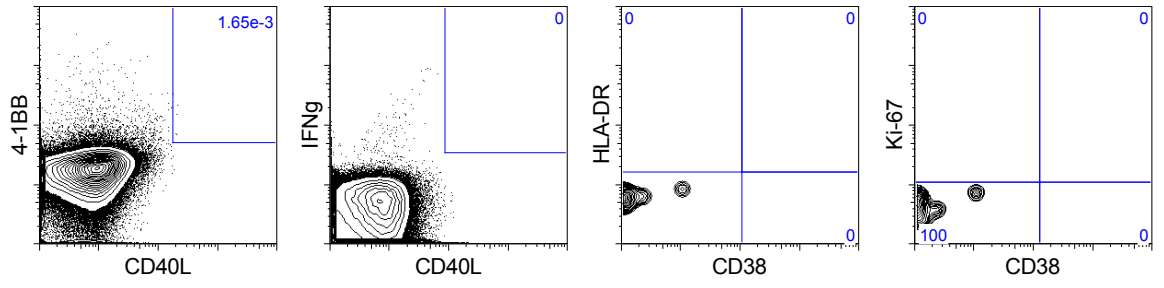

**P3  
S-I (N-term)**

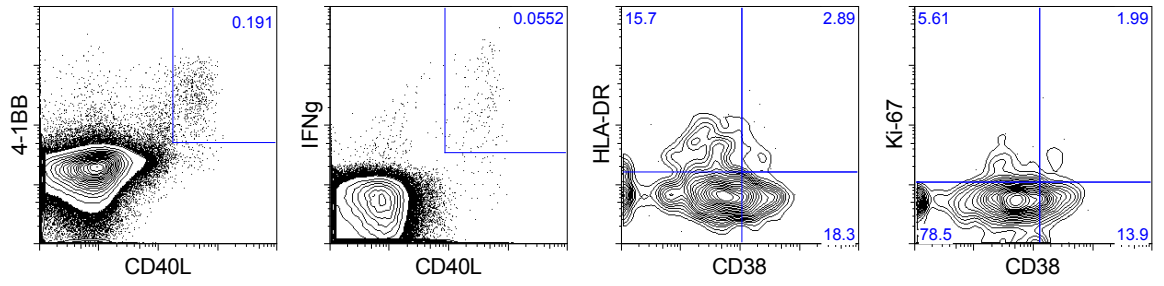

**P3  
S-II (C-term)**

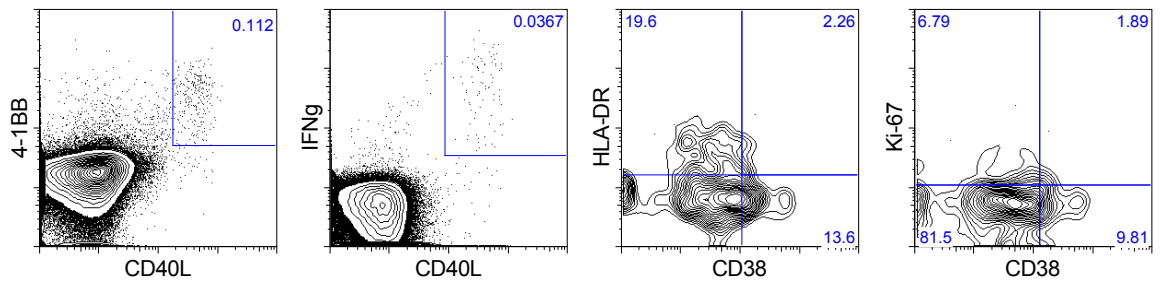

**P3  
CMVpp65**

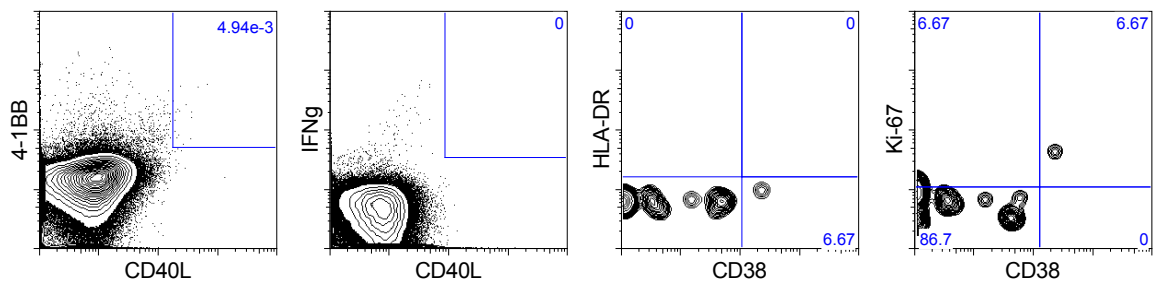

**P3  
SEB/TSST1**

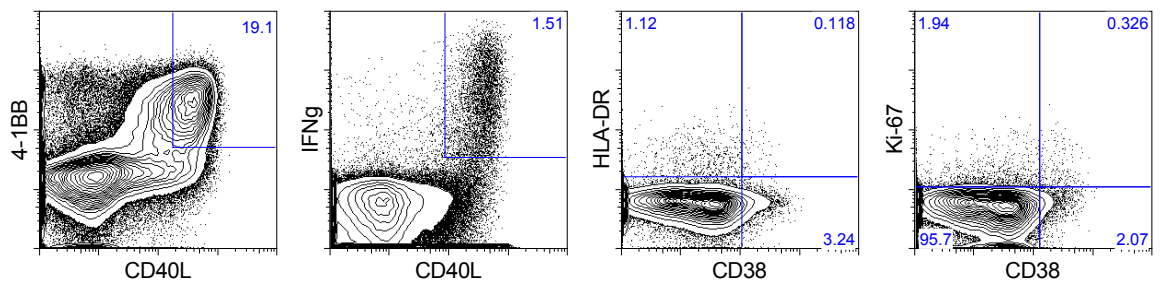



**P6  
unstimulated**

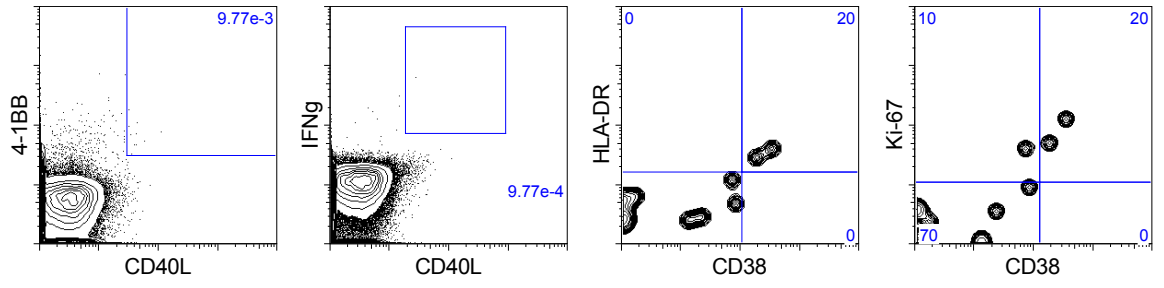

**P6  
S-I (N-term)**

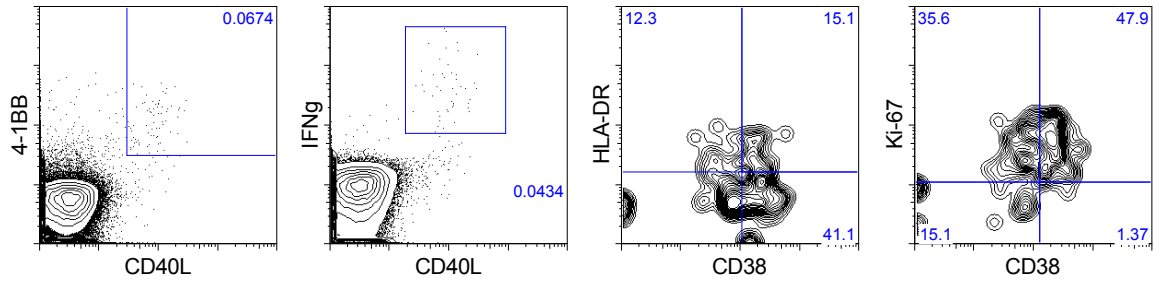

**P6  
S-II (C-term)**

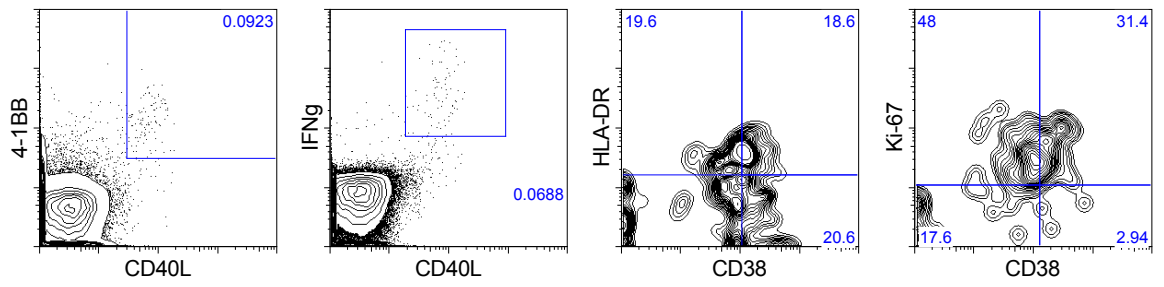

**P6  
CMVpp65**

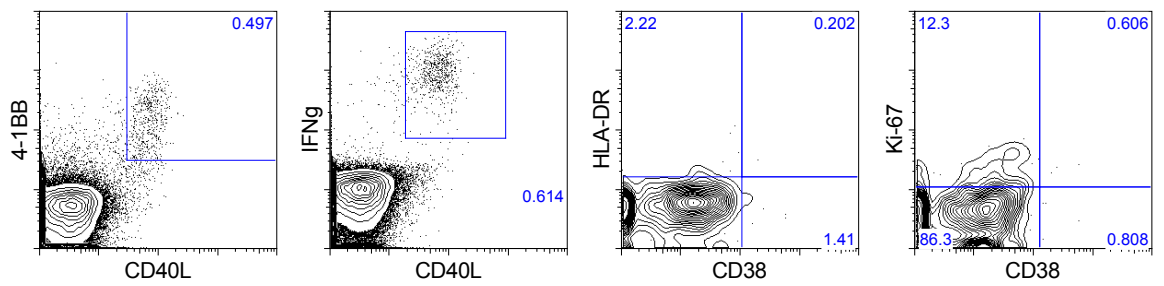

**P6  
SEB/TSST1**

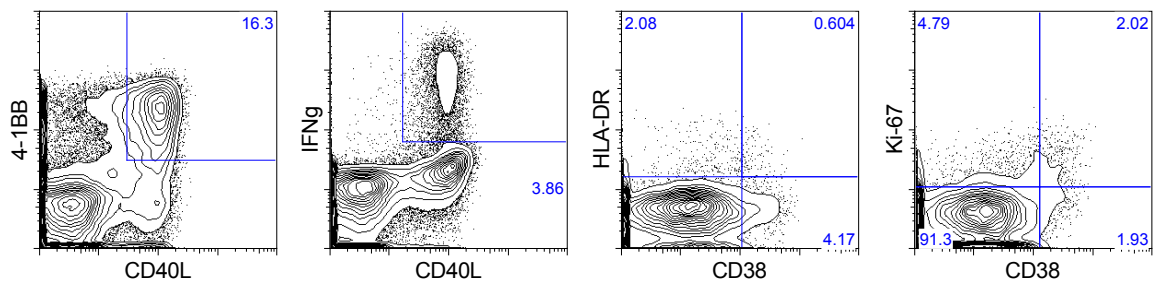

**P7  
unstimulated**

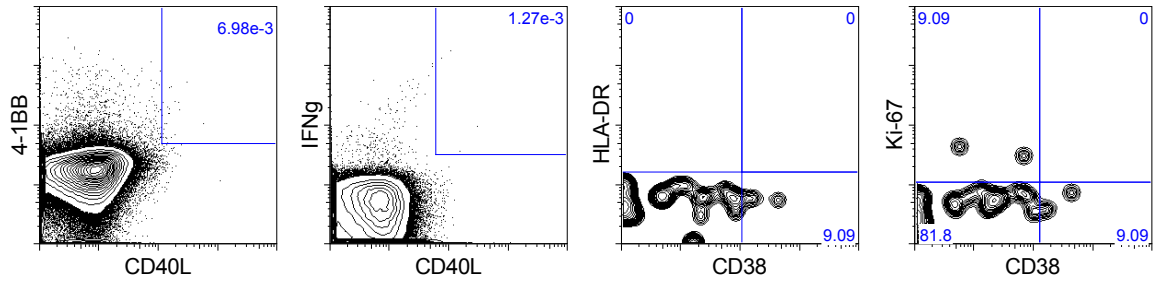

**P7  
S-I (N-term)**

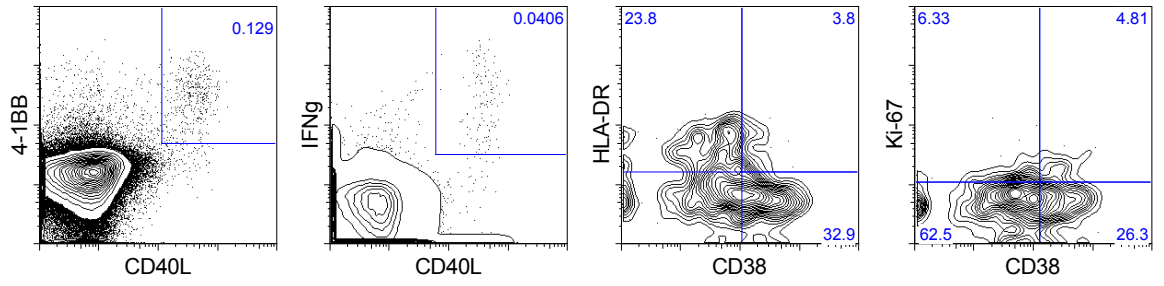

**P7  
S-II (C-term)**

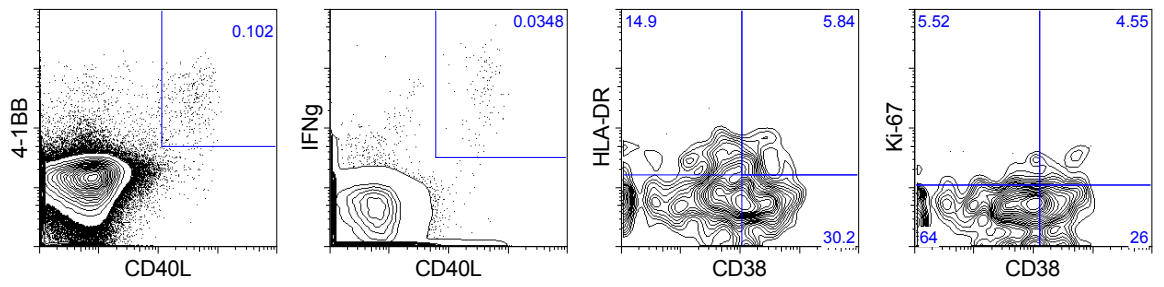

**P7  
CMVpp65**

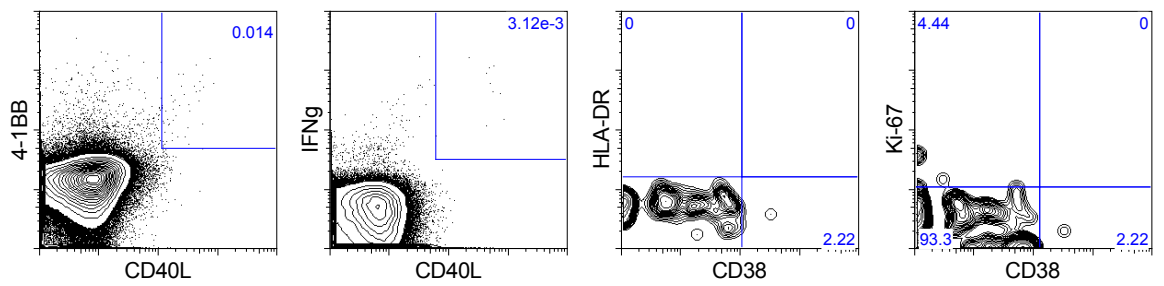

**P7  
SEB/TSST1**

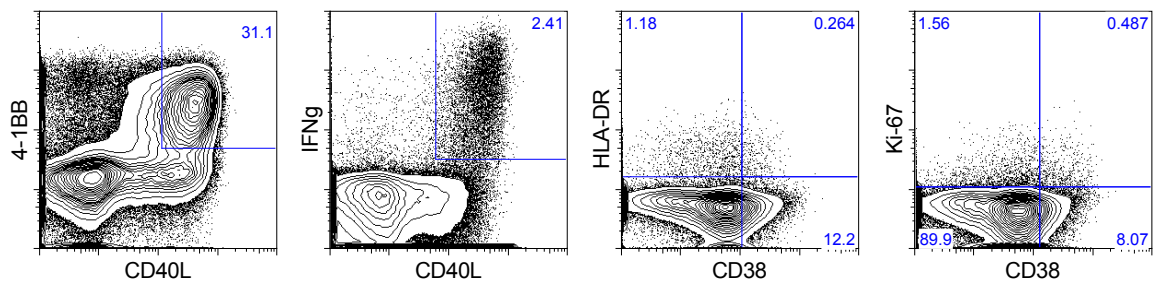

**P8  
unstimulated**

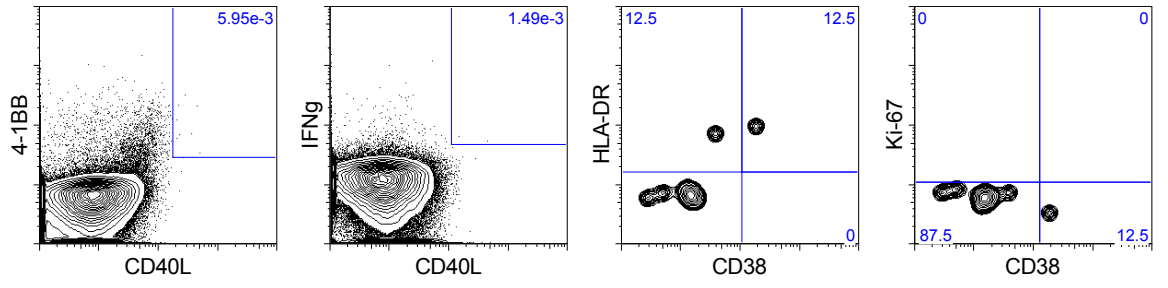

**P8  
S-I (N-term)**

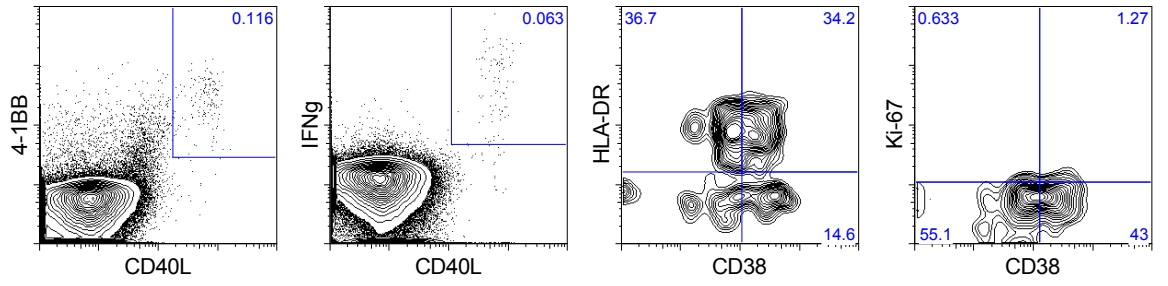

**P8  
S-II (C-term)**

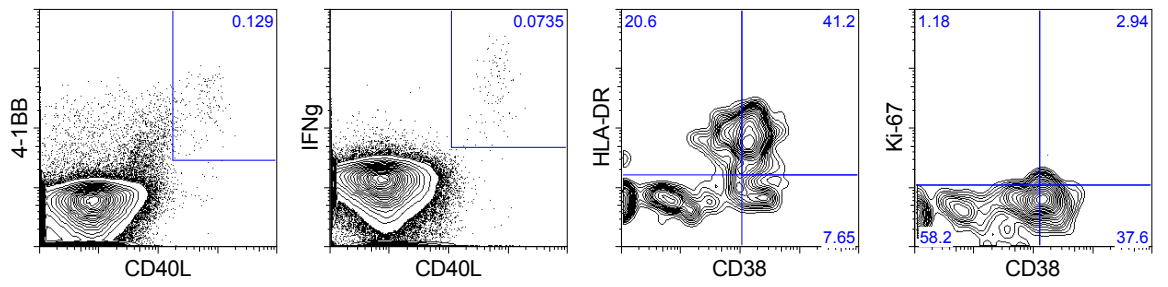

**P8  
CMVpp65**

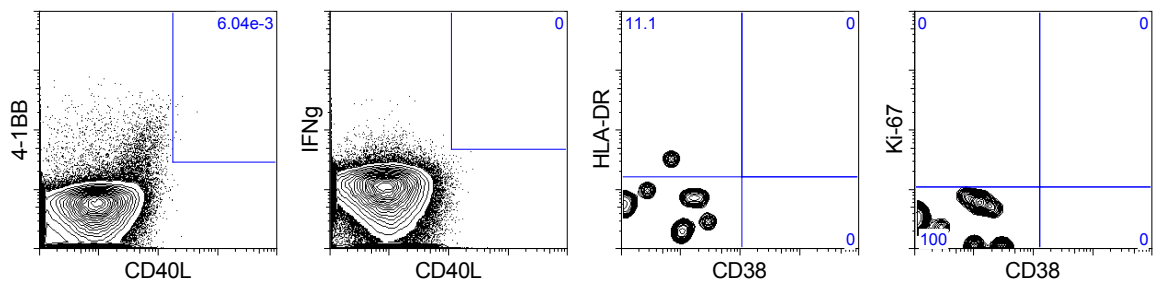

**P8  
SEB/TSST1**

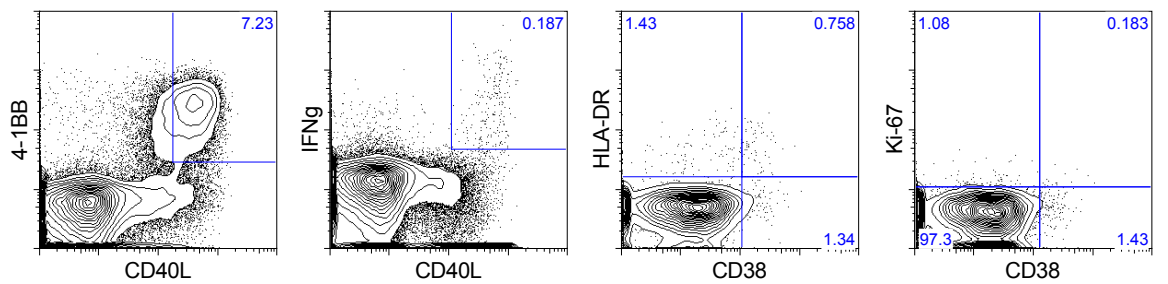

**P10  
unstimulated**

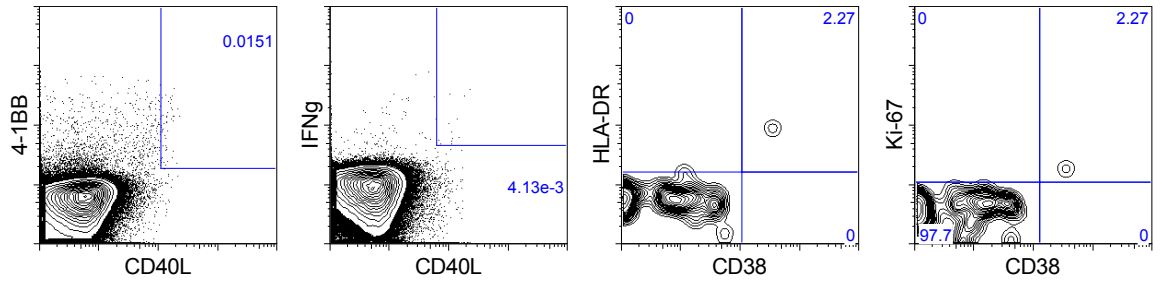

**P10  
S-I (N-term)**

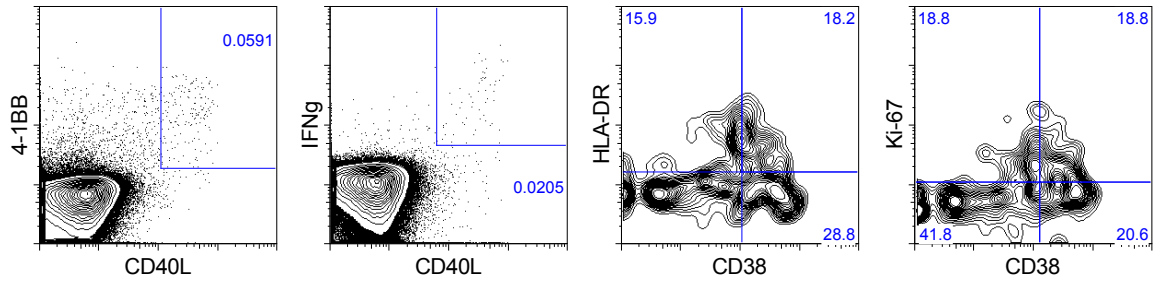

**P10  
S-II (C-term)**

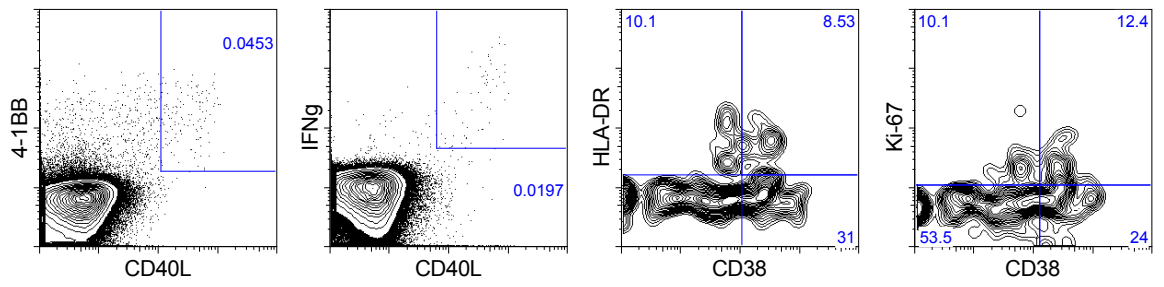

**P10  
CMVpp65**

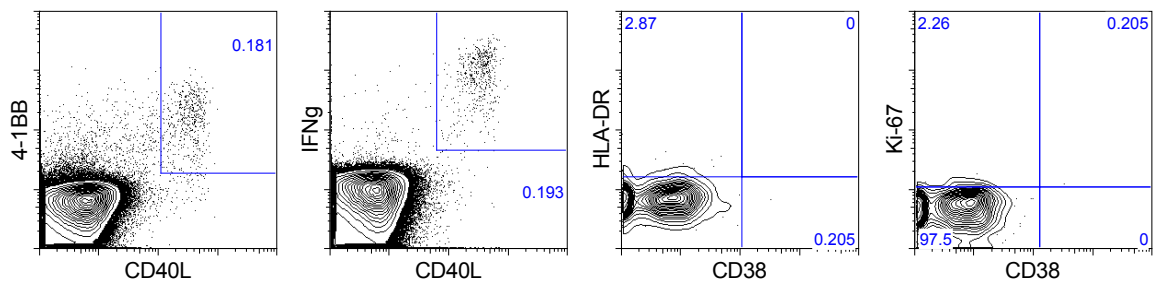

**P10  
SEB/TSST1**

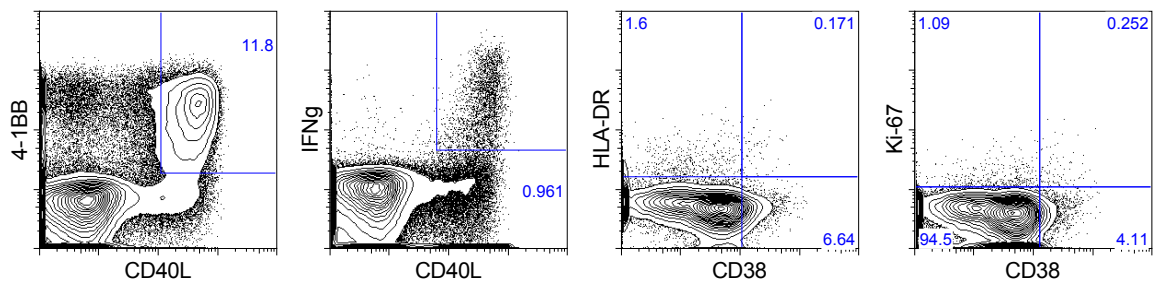

**P11  
unstimulated**

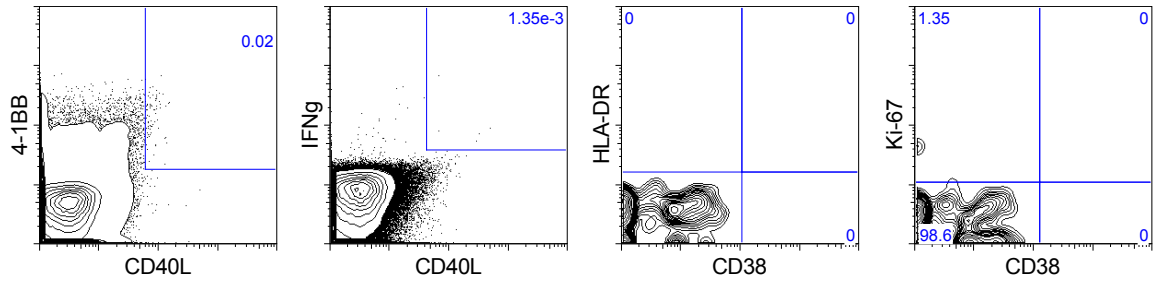

**P11  
S-I (N-term)**

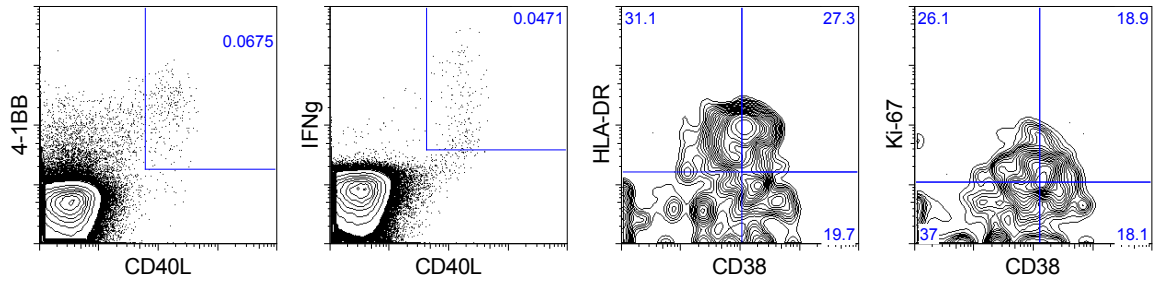

**P11  
S-II (C-term)**

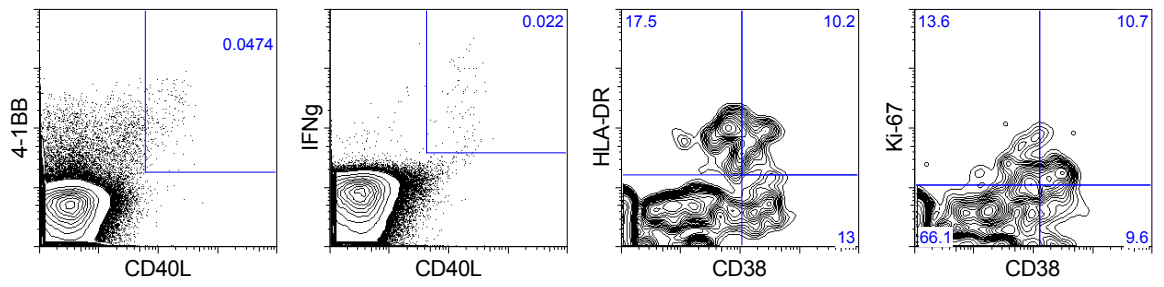

**P11  
CMVpp65**

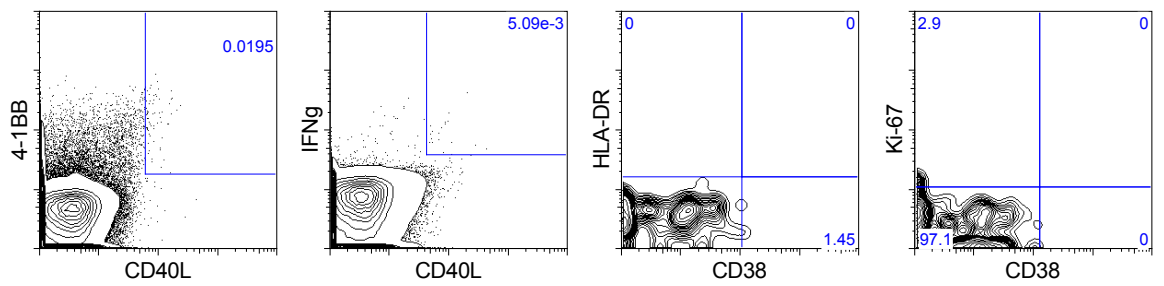

**P11  
SEB/TSST1**

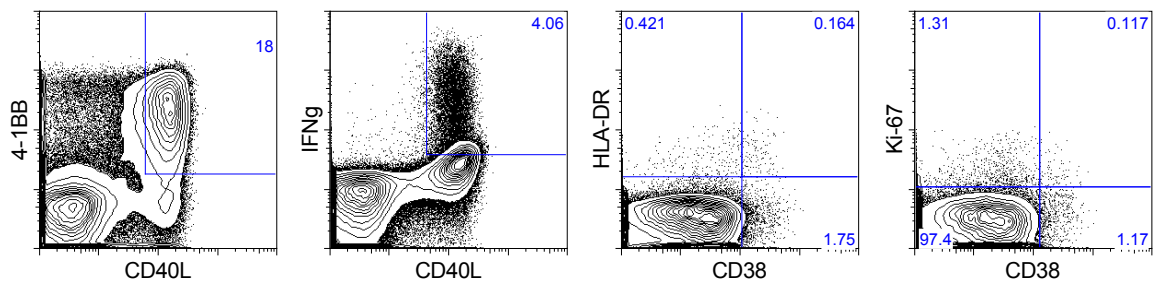

**P12  
unstimulated**

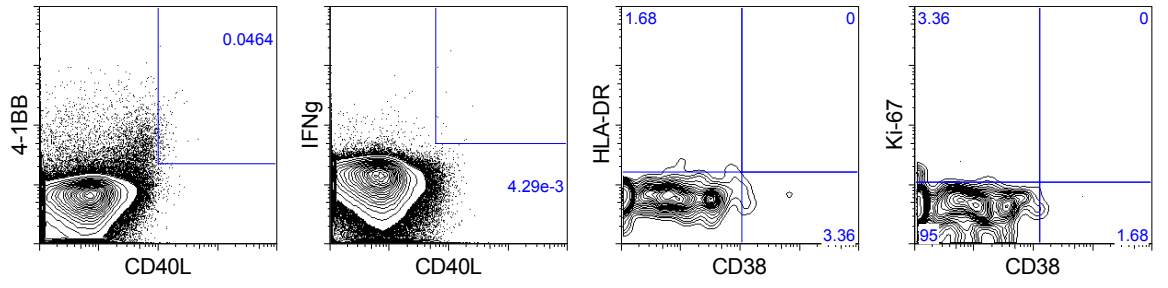

**P12  
S-I (N-term)**

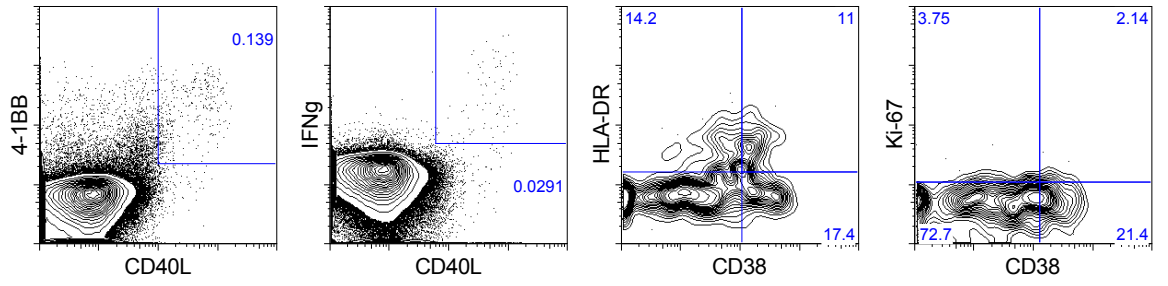

**P12  
S-II (C-term)**

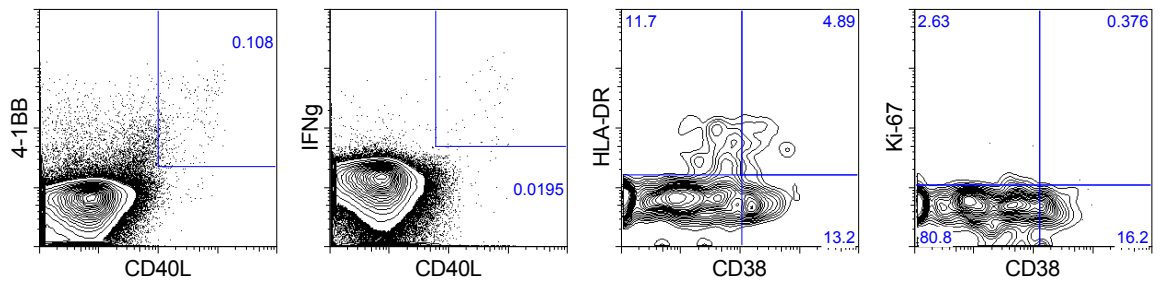

**P12  
CMVpp65**

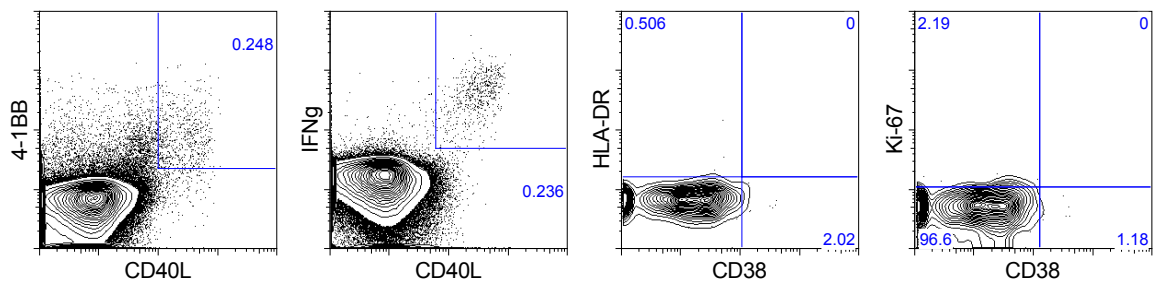

**P12  
SEB/TSST1**

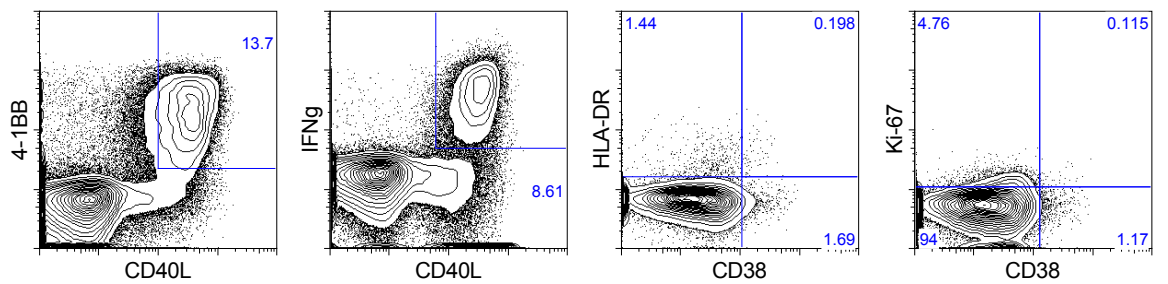



**P14  
unstimulated**

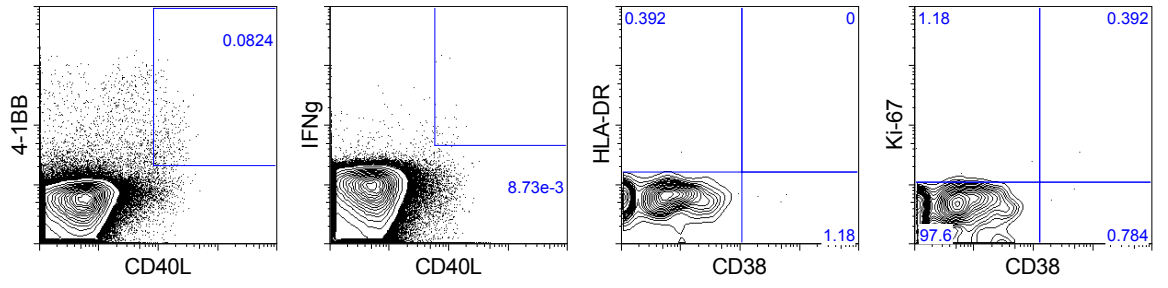

**P14  
S-I (N-term)**

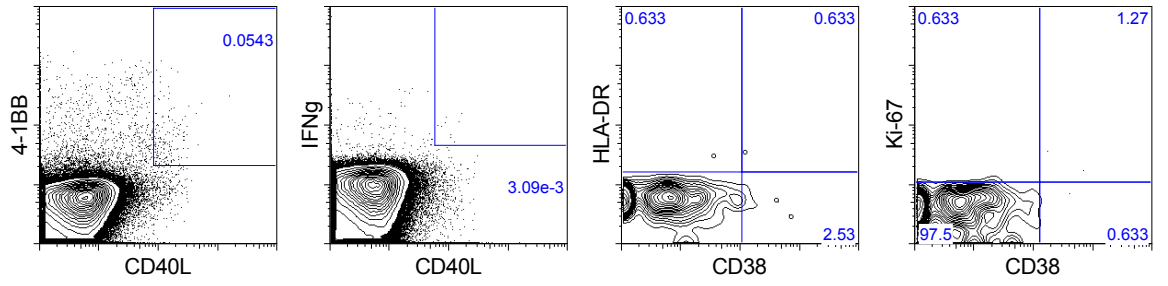

**P14  
S-II (C-term)**

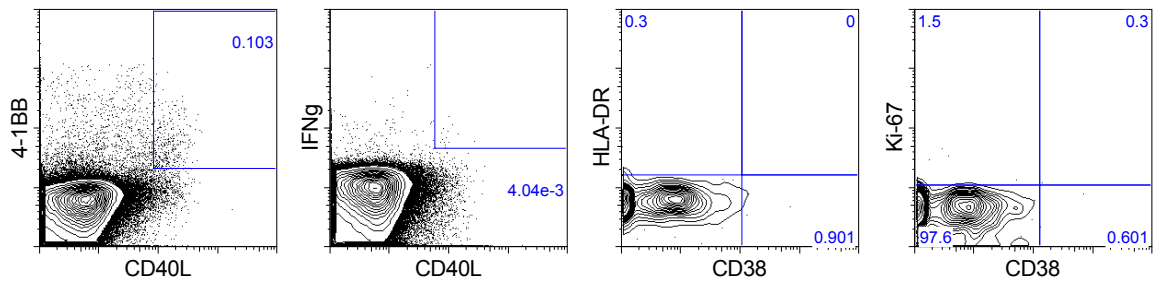

**P14  
CMVpp65**

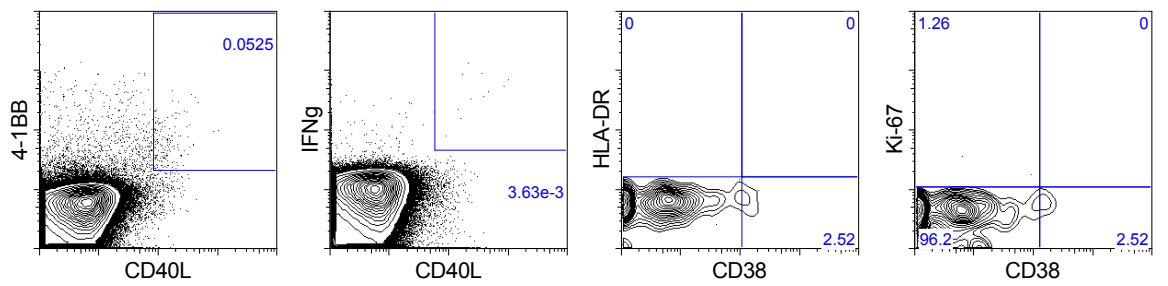

**P14  
SEB/TSST1**

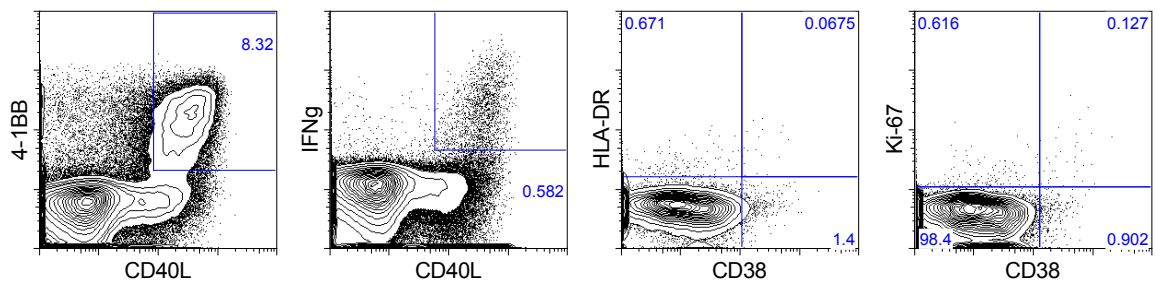

**P15  
unstimulated**

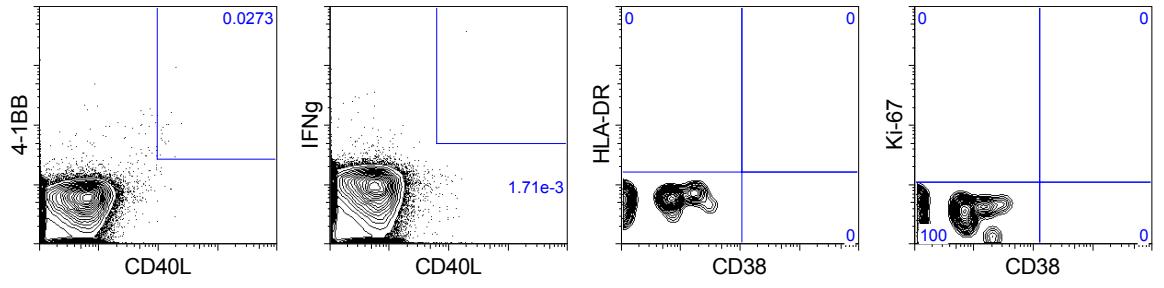

**P15  
S-I (N-term)**

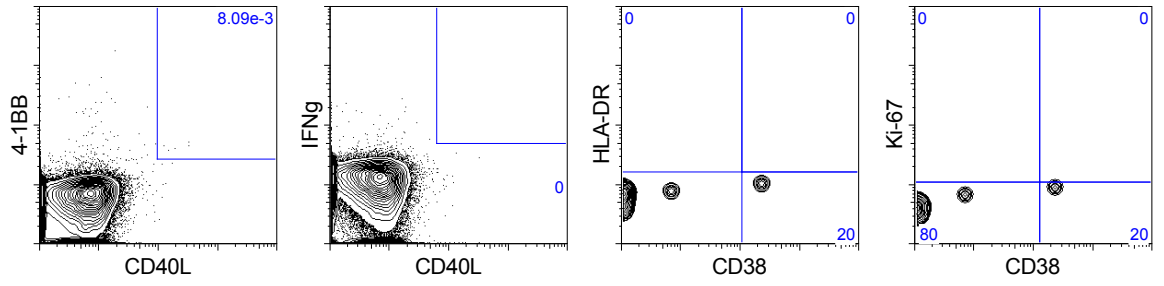

**P15  
S-II (C-term)**

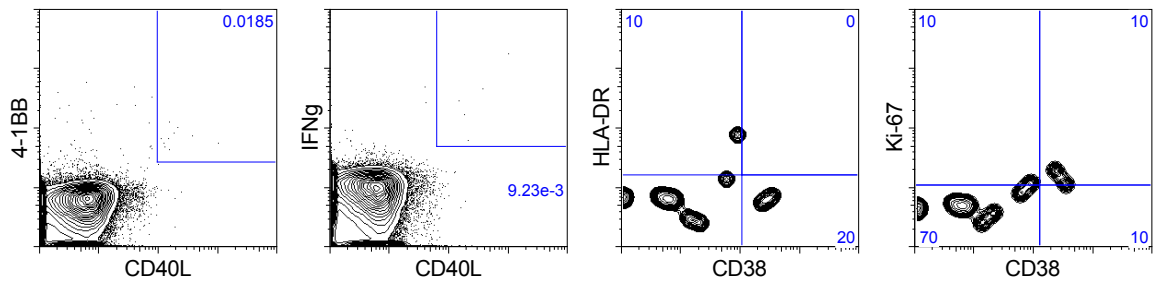

**P15  
CMVpp65**

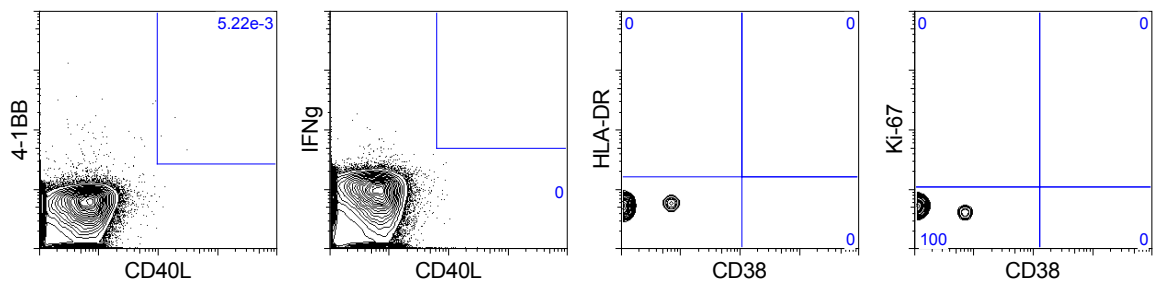

**P15  
SEB/TSST1**

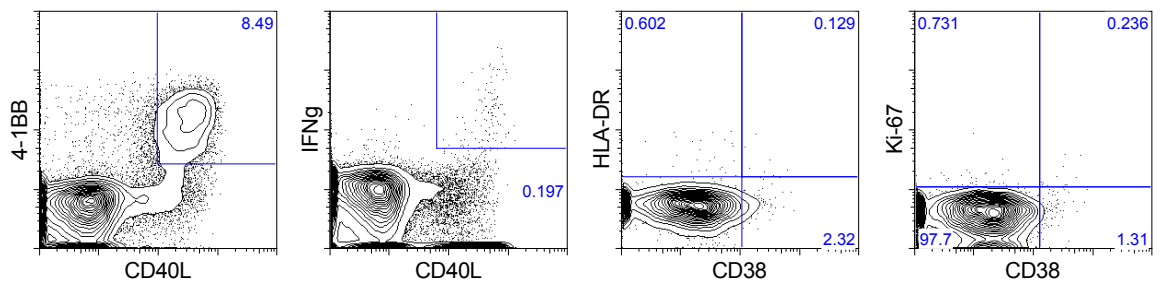



**P16  
unstimulated**

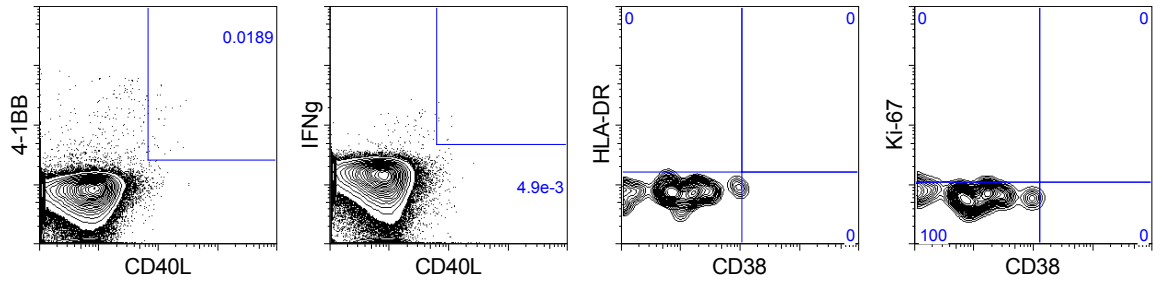

**P16  
S-I (N-term)**

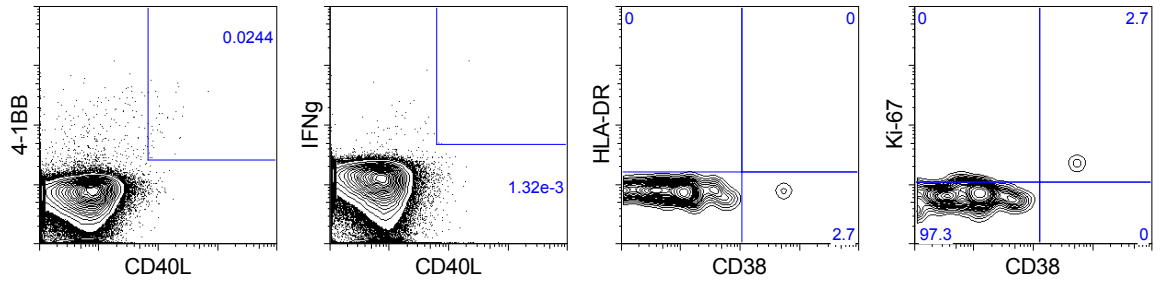

**P16  
S-II (C-term)**

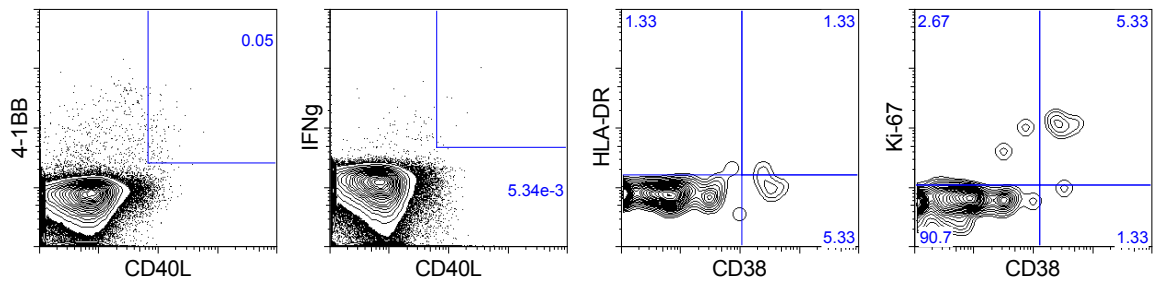

**P16  
CMVpp65**

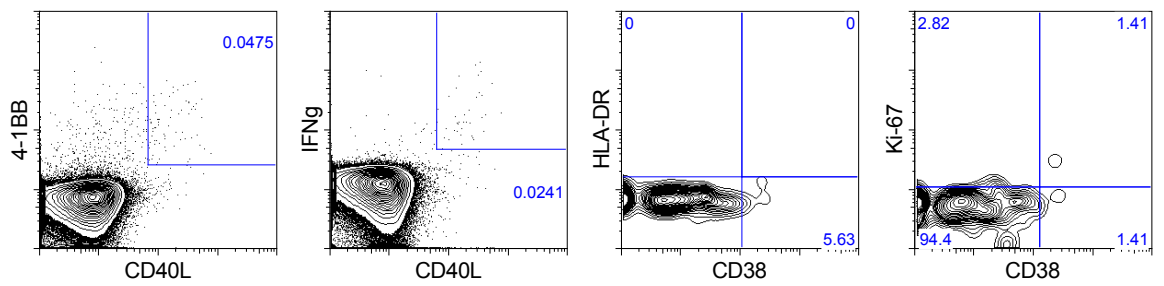

**P16  
SEB/TSST1**

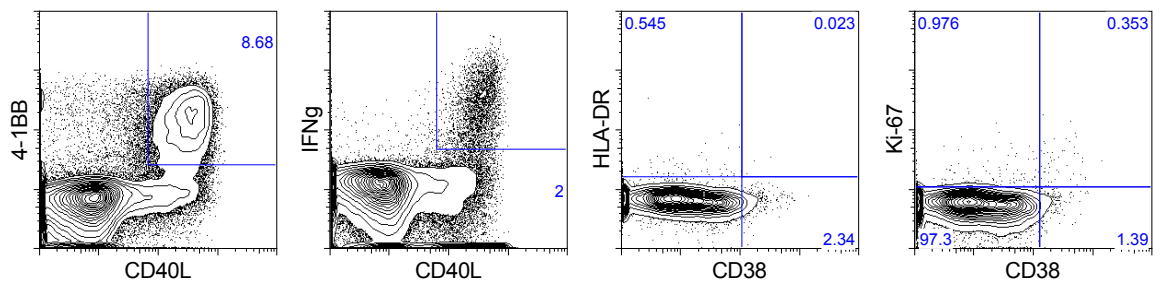

**P18  
unstimulated**

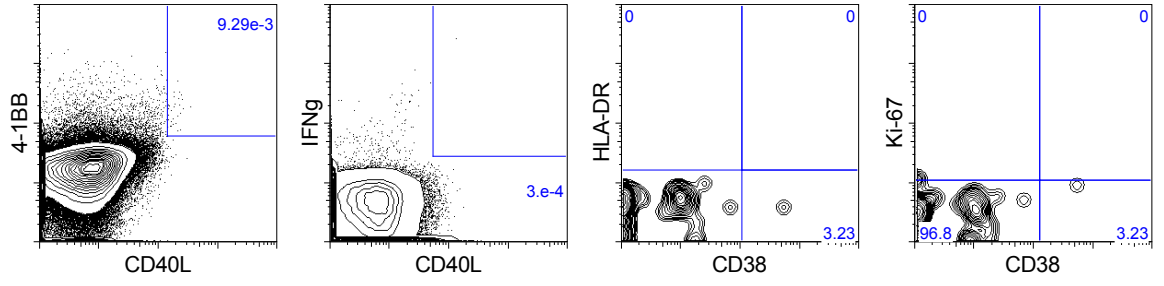

**P18  
S-I (N-term)**

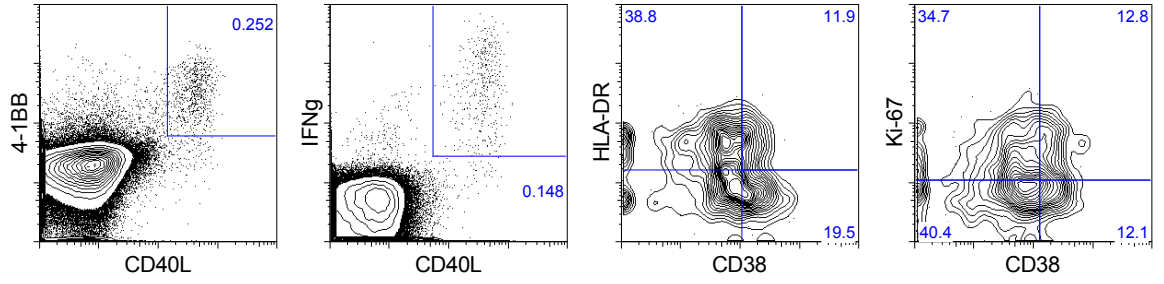

**P18  
S-II (C-term)**

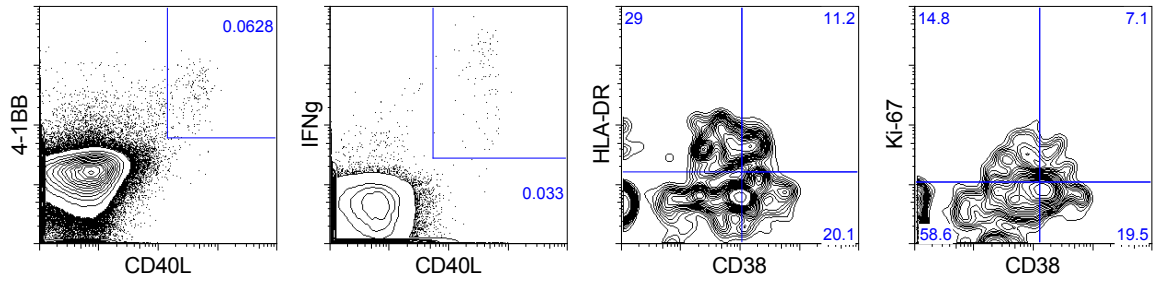

**P18  
CMVpp65**

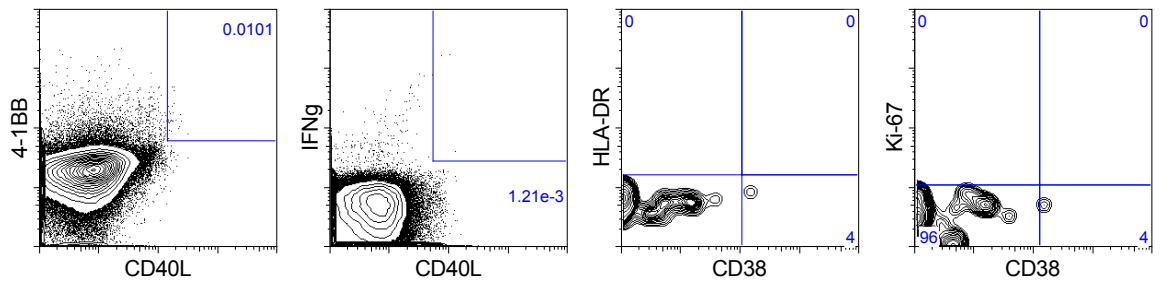

**P18  
SEB/TSST1**

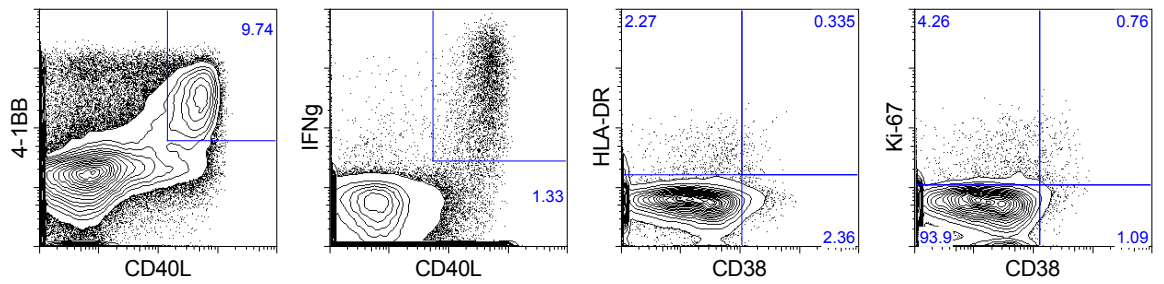

**P19  
unstimulated**

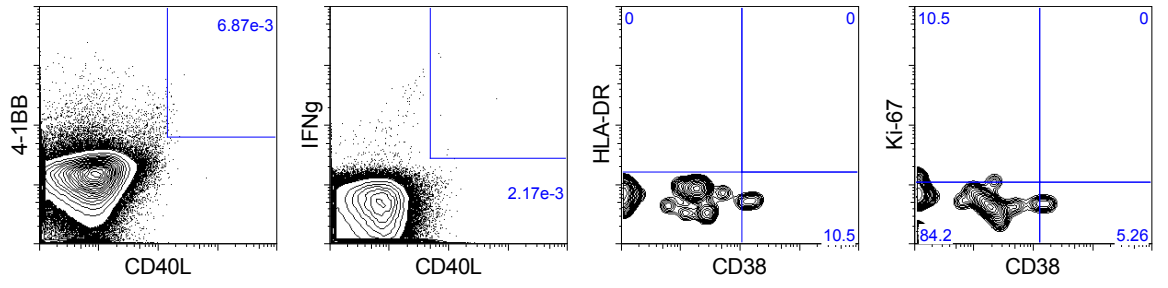

**P19  
S-I (N-term)**

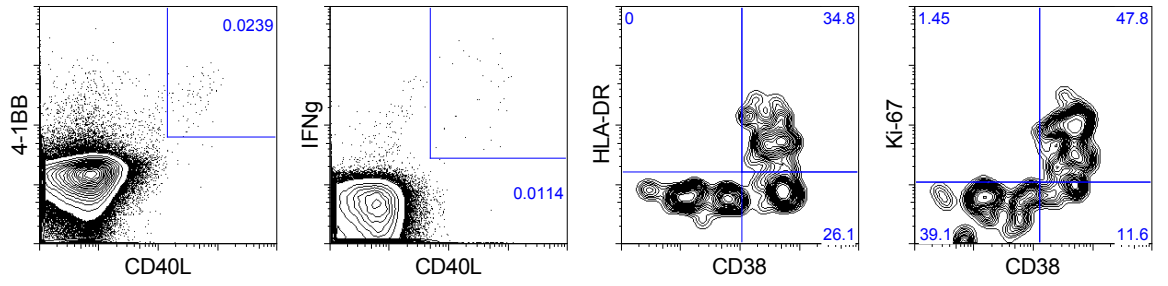

**P19  
S-II (C-term)**

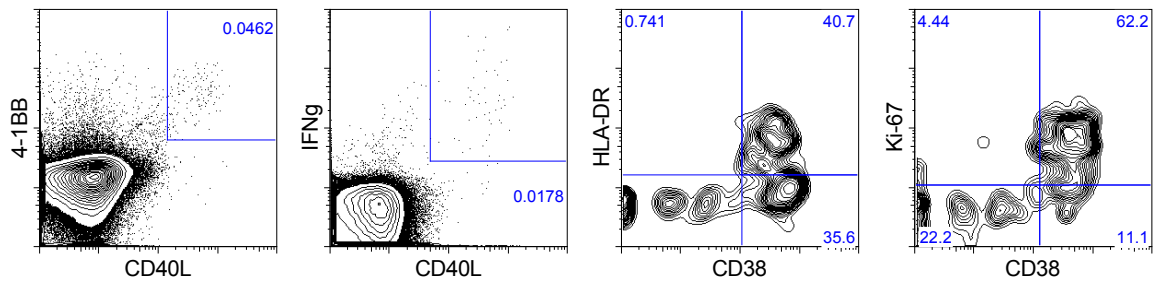

**P19  
CMVpp65**

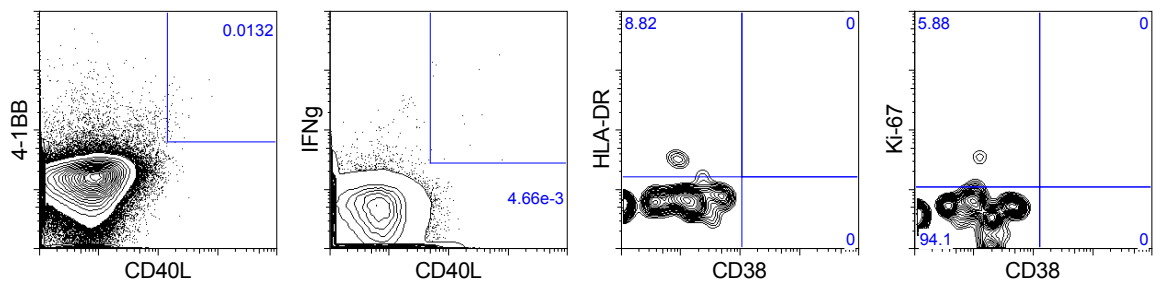

**P19  
SEB/TSST1**

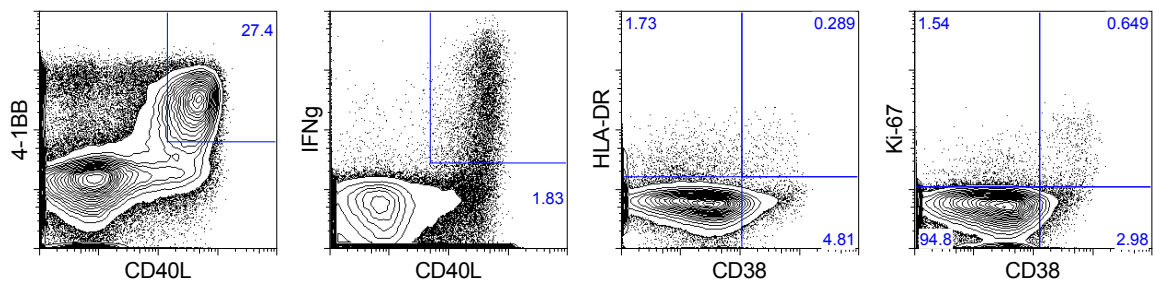

**P20  
unstimulated**

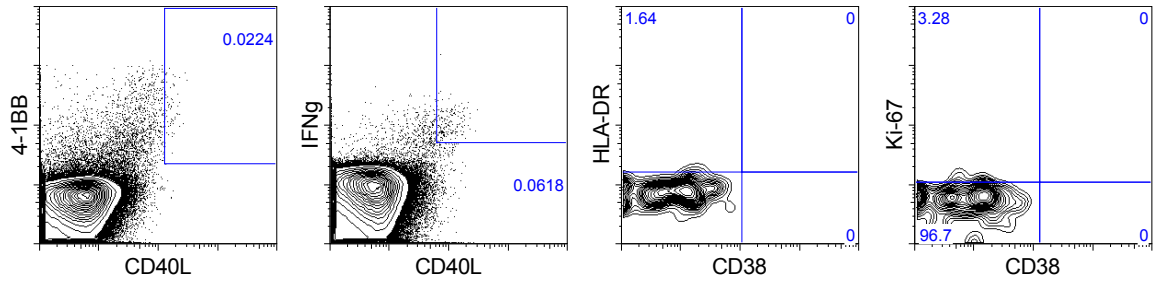

**P20  
S-I (N-term)**

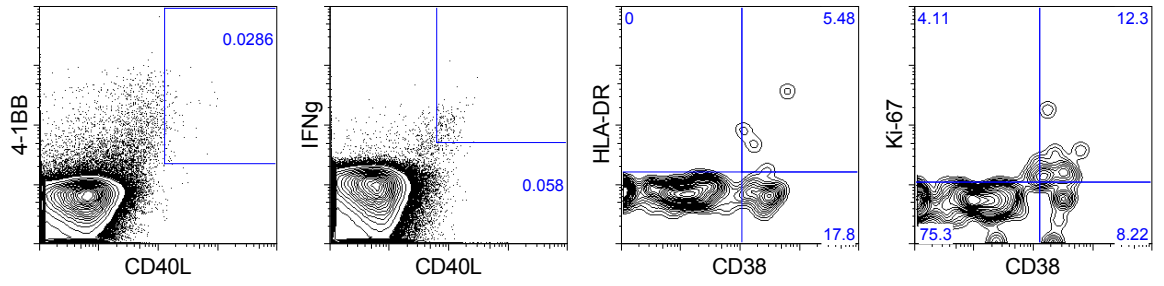

**P20  
S-II (C-term)**

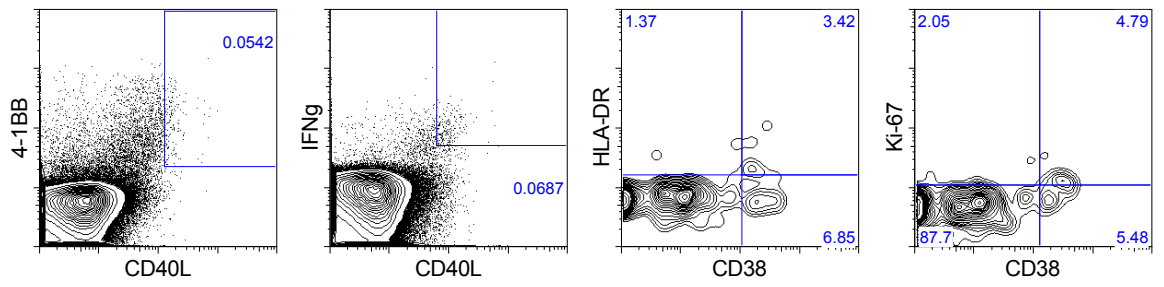

**P20  
CMVpp65**

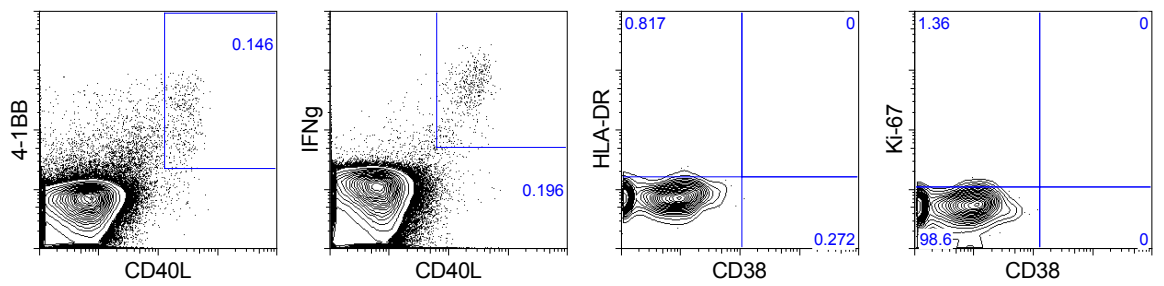

**P20  
SEB/TSST1**

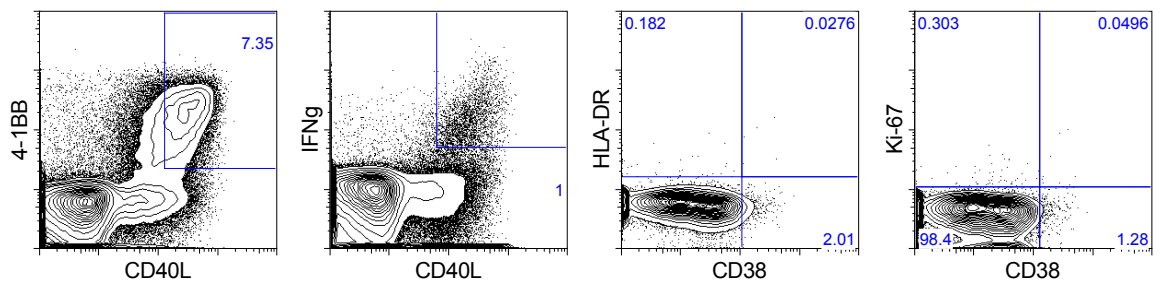

**P21  
unstimulated**

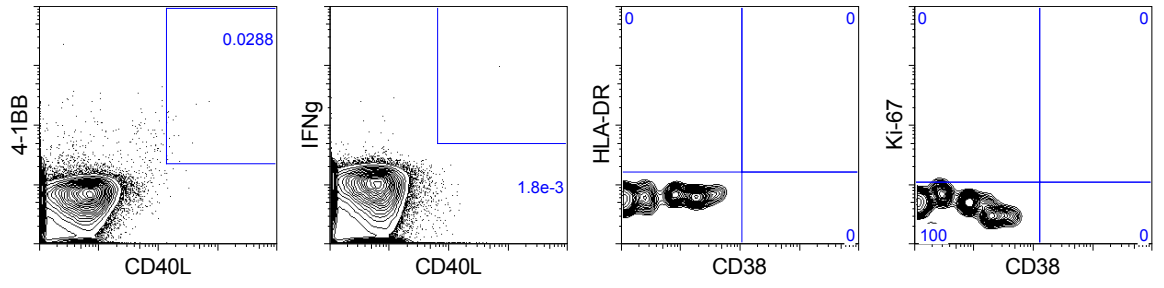

**P21  
S-I (N-term)**

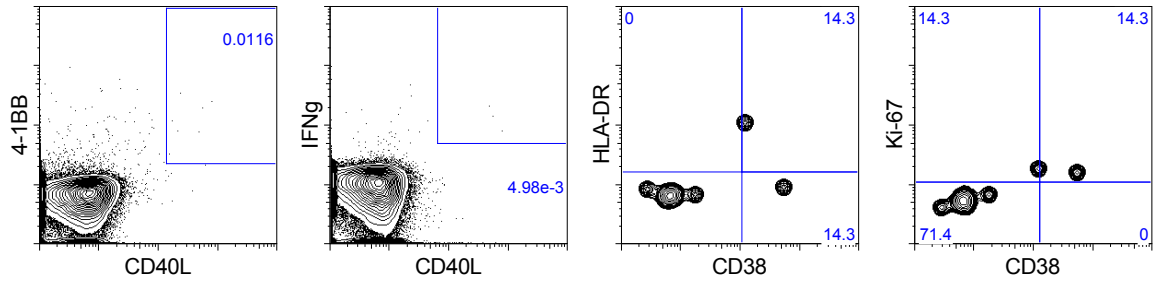

**P21  
S-II (C-term)**

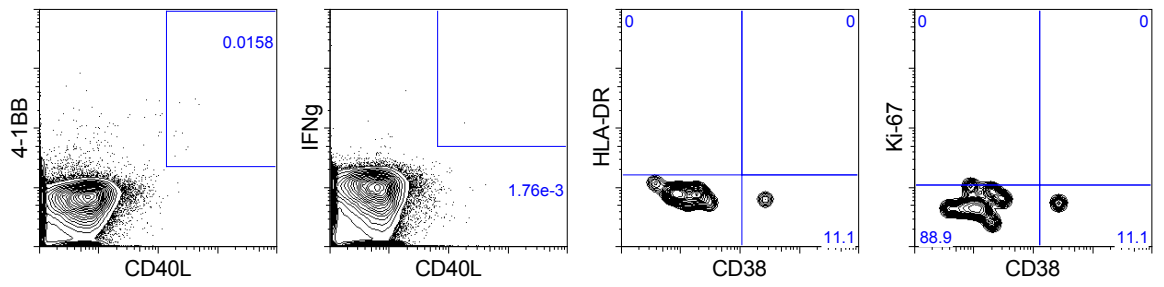

**P21  
CMVpp65**

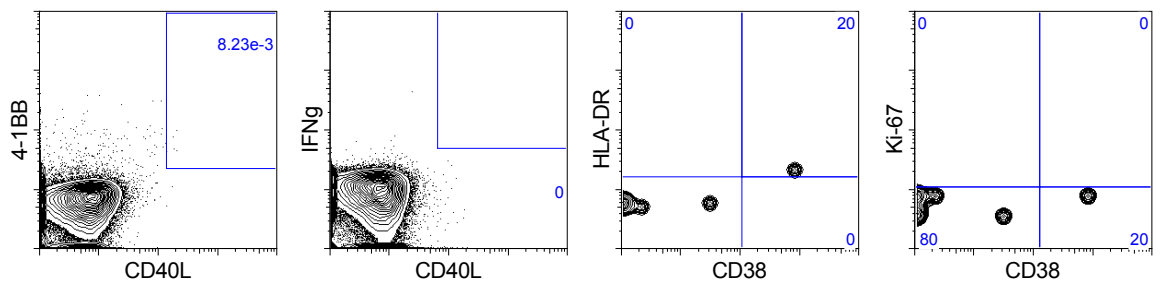

**P21  
SEB/TSST1**

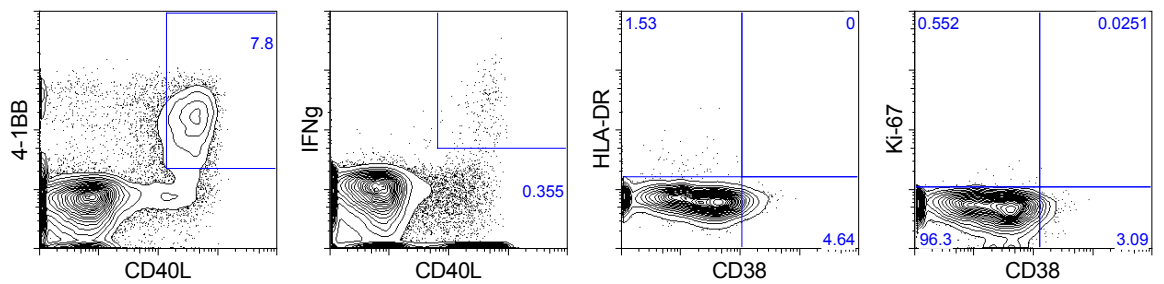

**P23  
unstimulated**

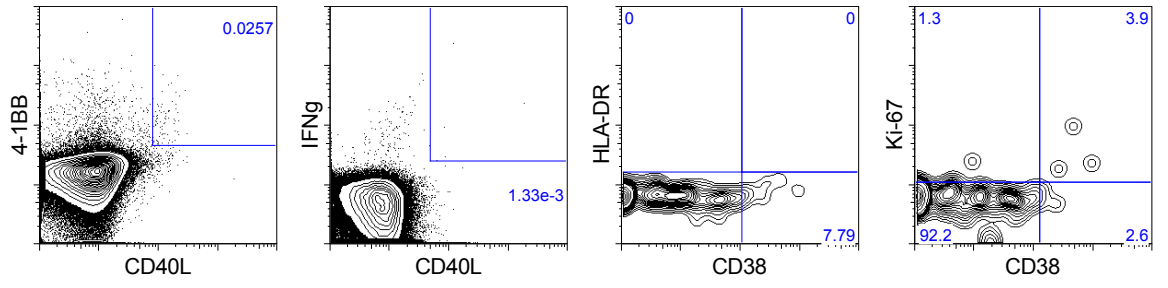

**P23  
S-I (N-term)**

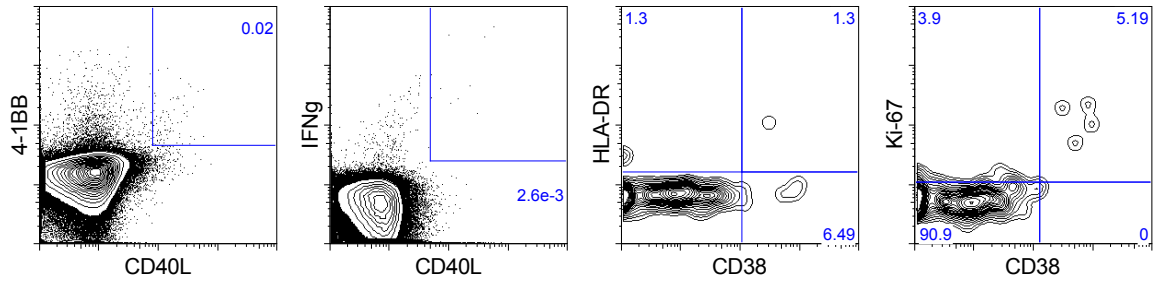

**P23  
S-II (C-term)**

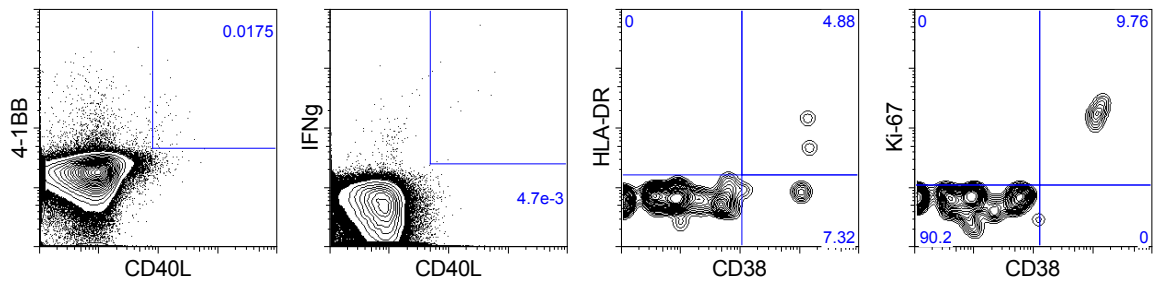

**P23  
CMVpp65**

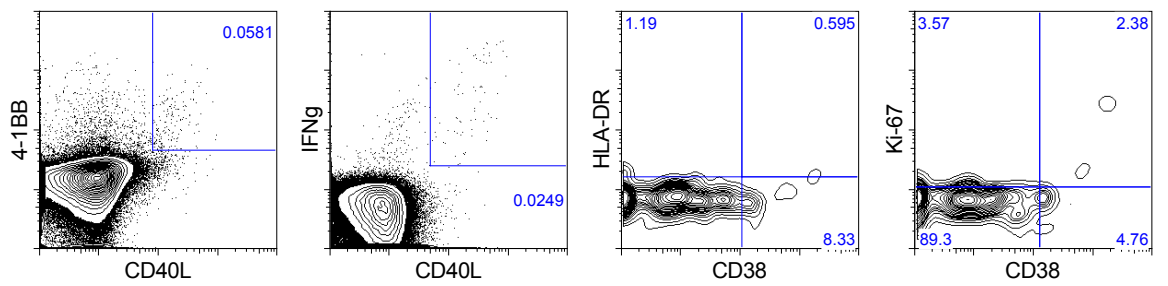

**P23  
SEB/TSST1**

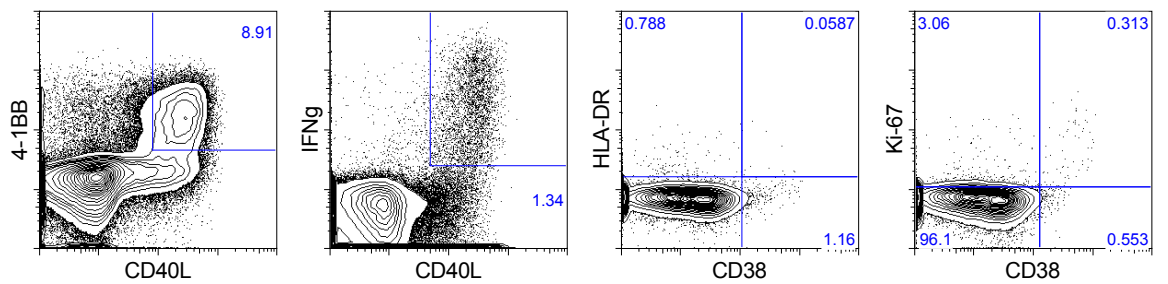



**P24 unstimulated**

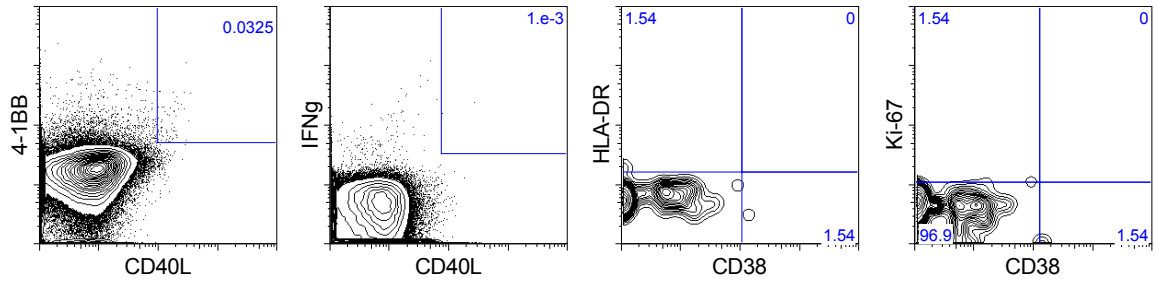

**P24 S-I (N-term)**

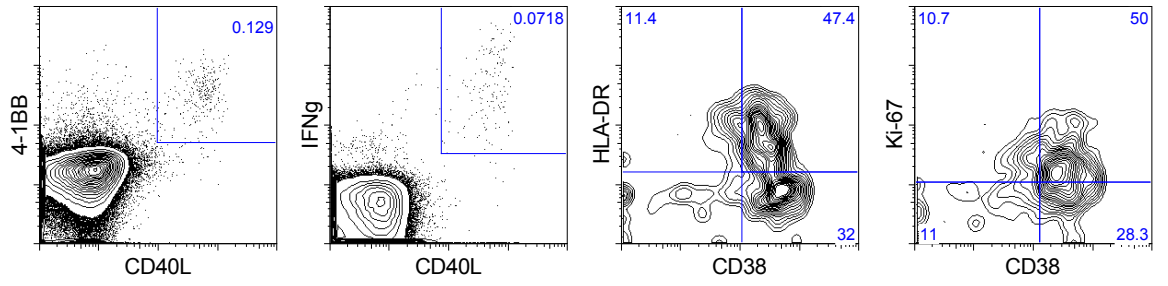

**P24 S-II (C-term)**

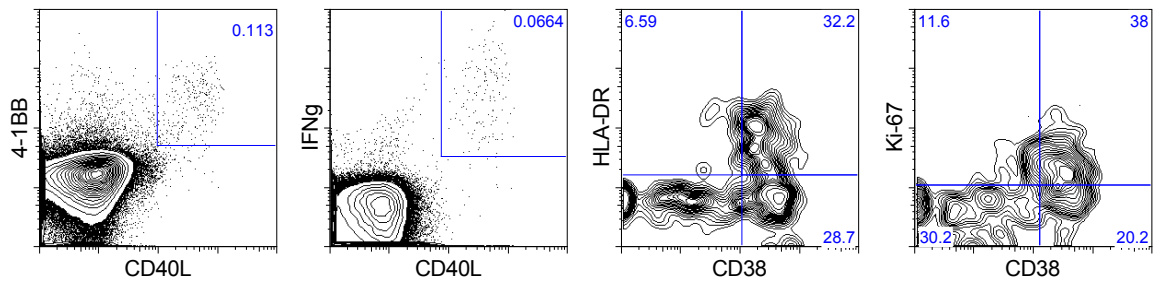

**P24 CMVpp65**

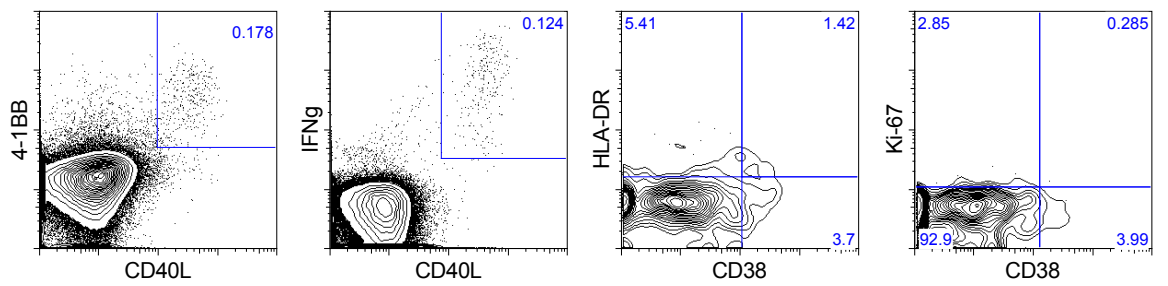

**P24 SEB/TSST1**

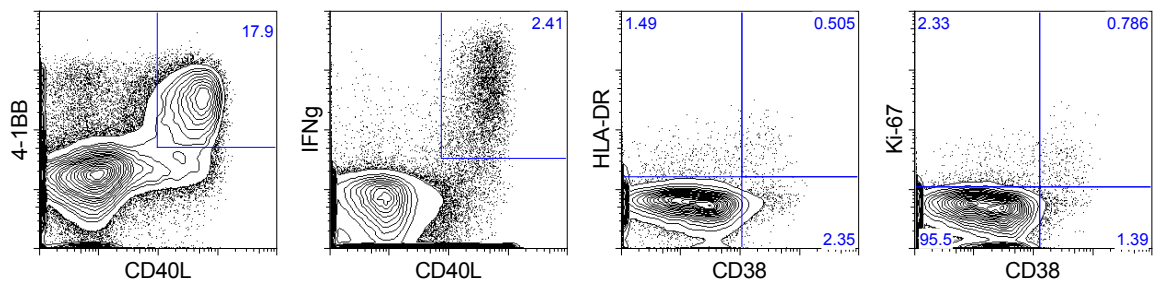

**P27  
unstimulated**

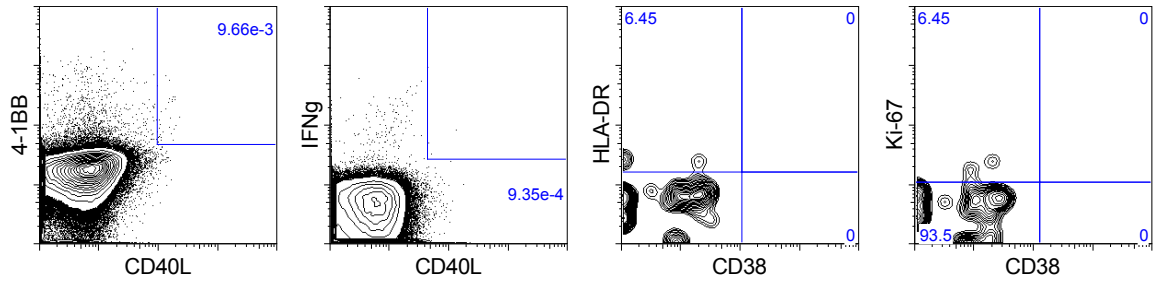

**P27  
S-I (N-term)**

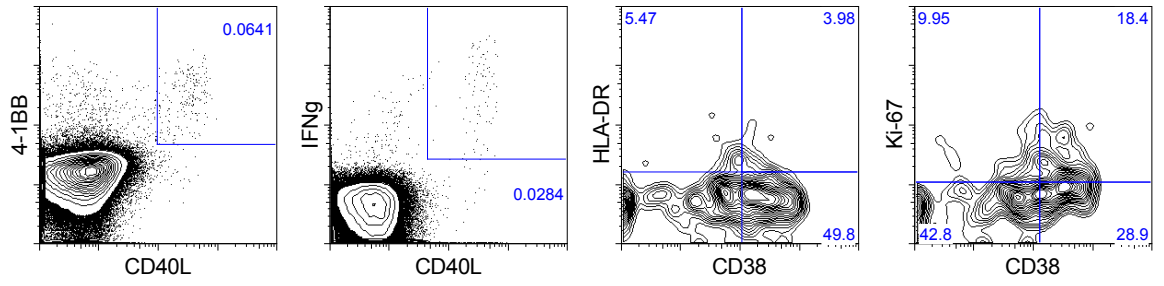

**P27  
S-II (C-term)**

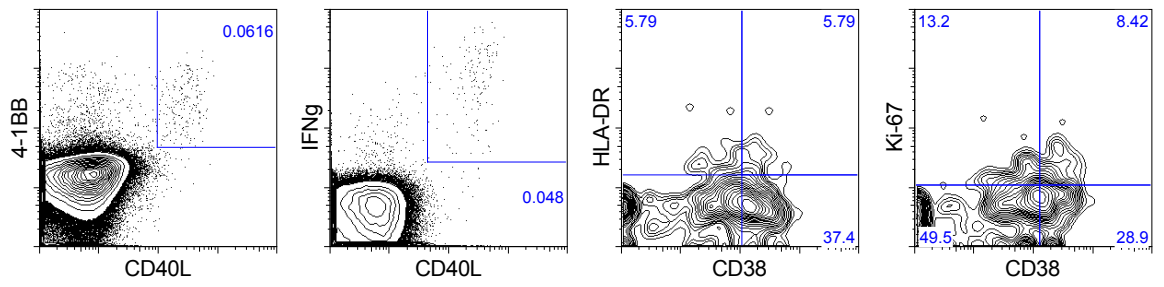

**P27  
CMVpp65**

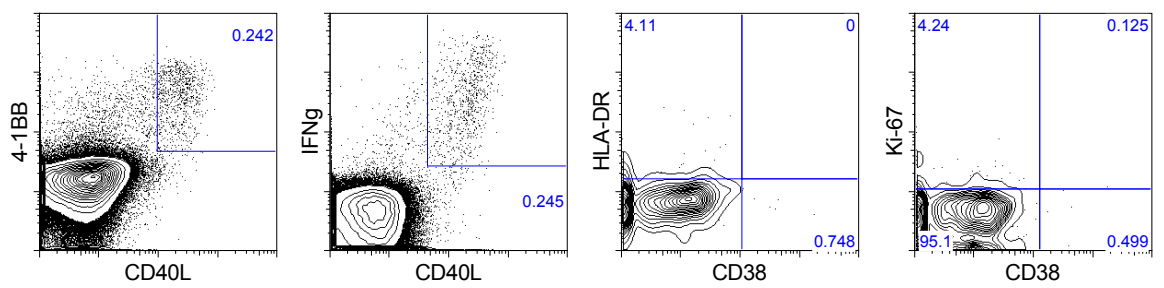

**P27  
SEB/TSST1**

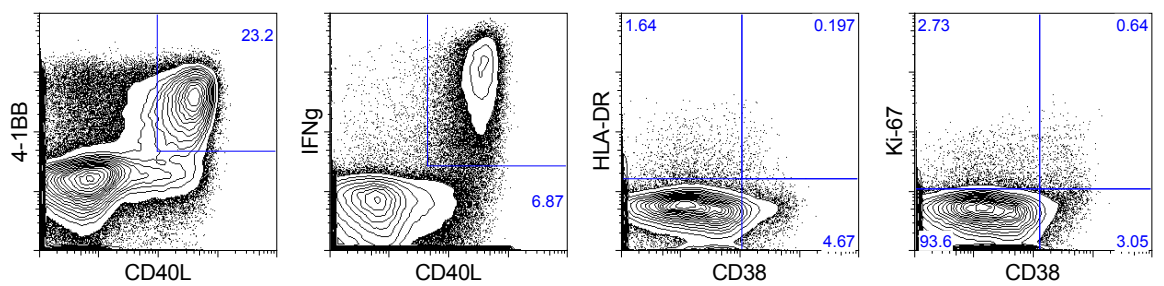



Healthy Donors (HD)  
n=44

**HD03  
unstimulated**

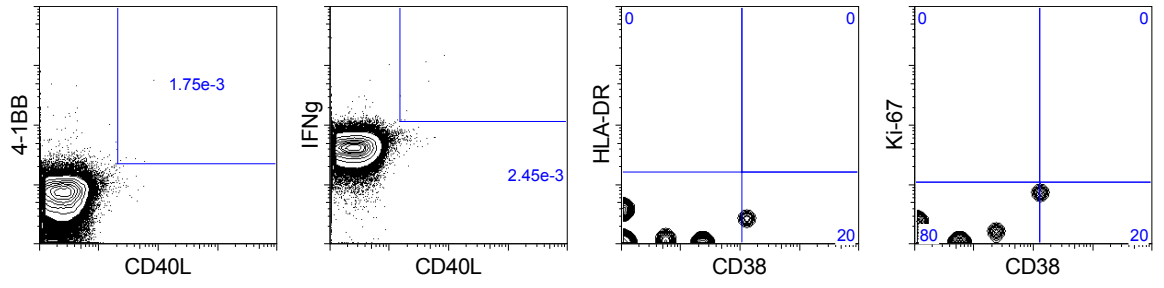

**HD03  
S-I (N-term)**

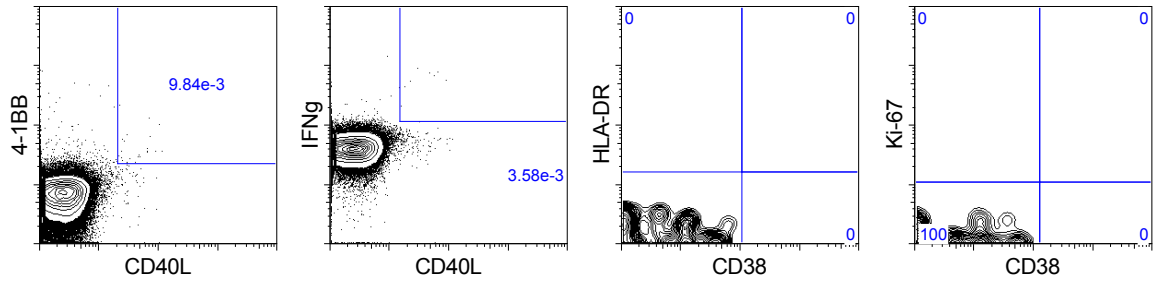

**HD03  
S-II (C-term)**

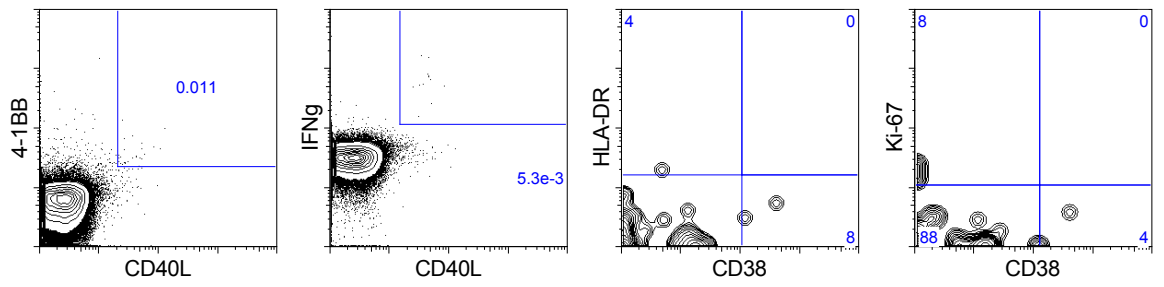

**HD03  
CMVpp65**

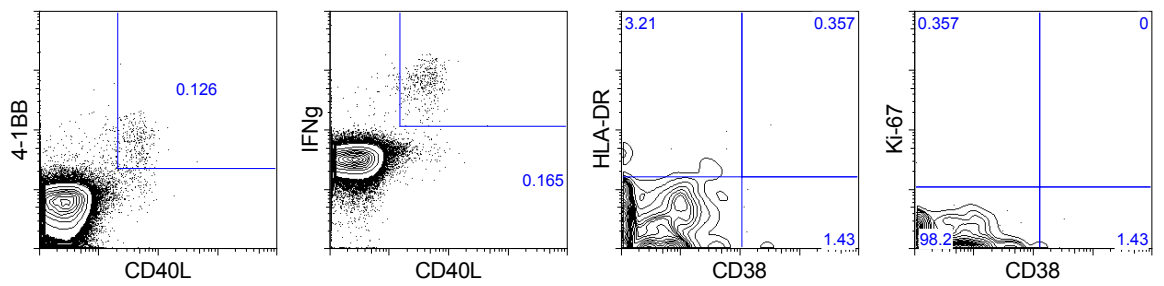

**HD03  
SEB/TSST1**

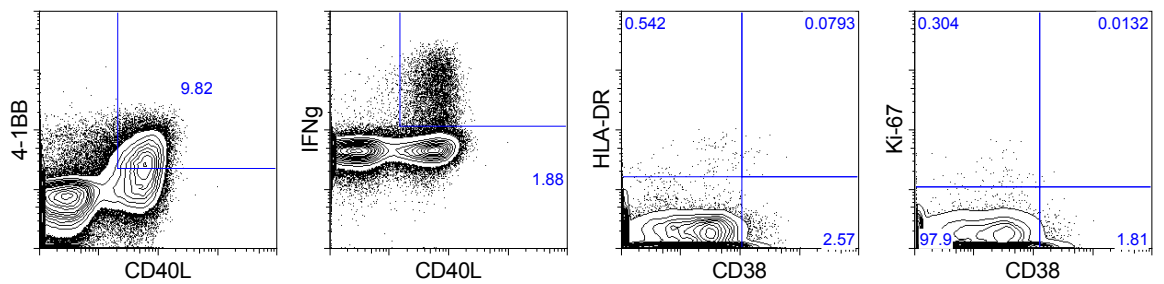

**HD04  
unstimulated**

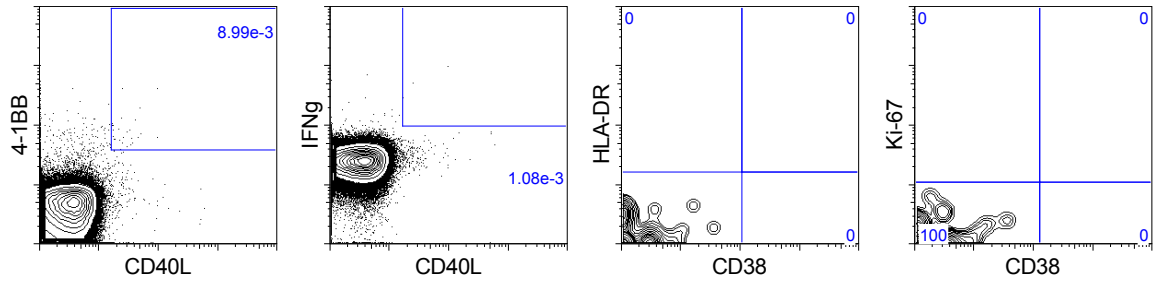

**HD04  
S-I (N-term)**

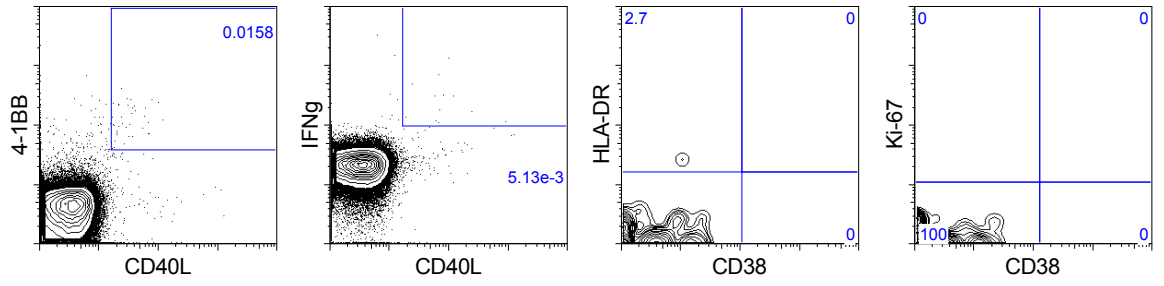

**HD04  
S-II (C-term)**

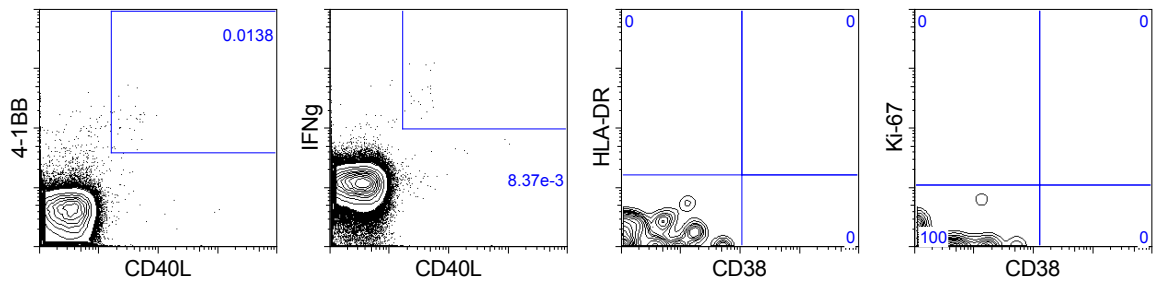

**HD04  
CMVpp65**

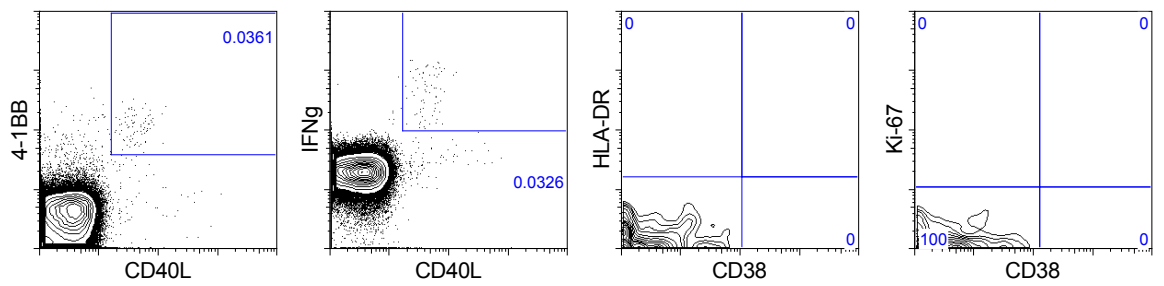

**HD04  
SEB/TSST1**

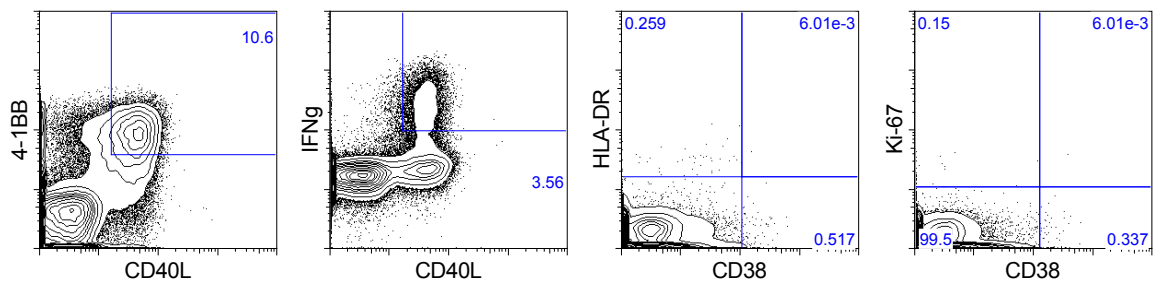

**HD08  
unstimulated**

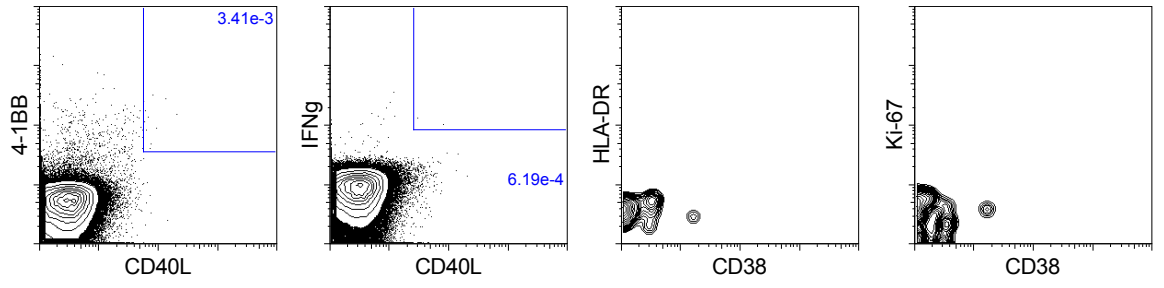

**HD08  
S-I (N-term)**

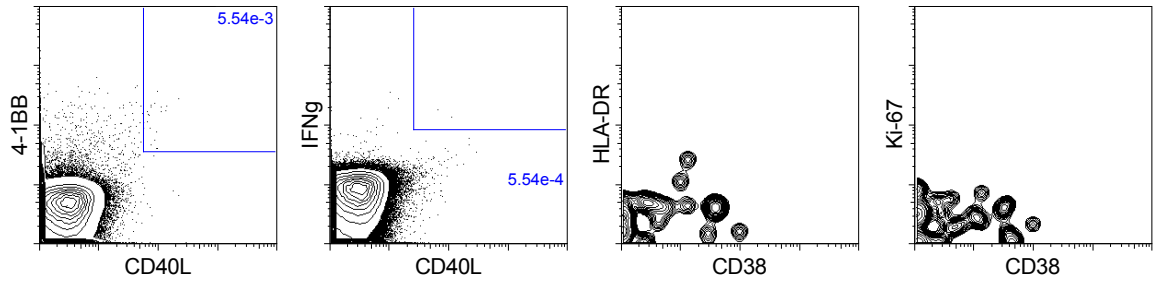

**HD08  
S-II (C-term)**

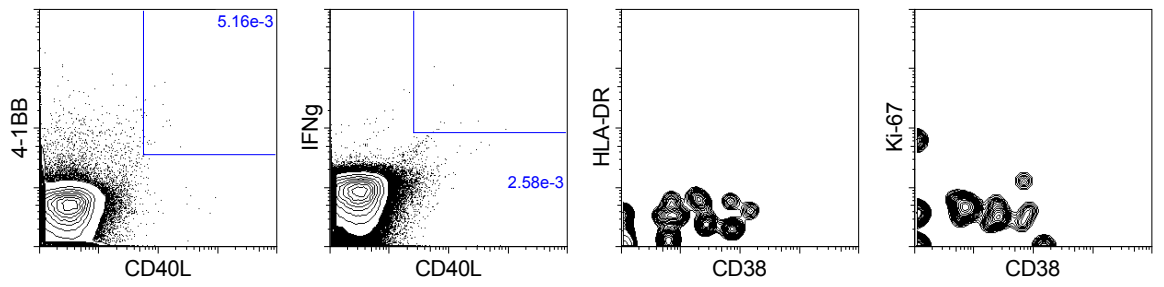

**HD08  
CMVpp65**

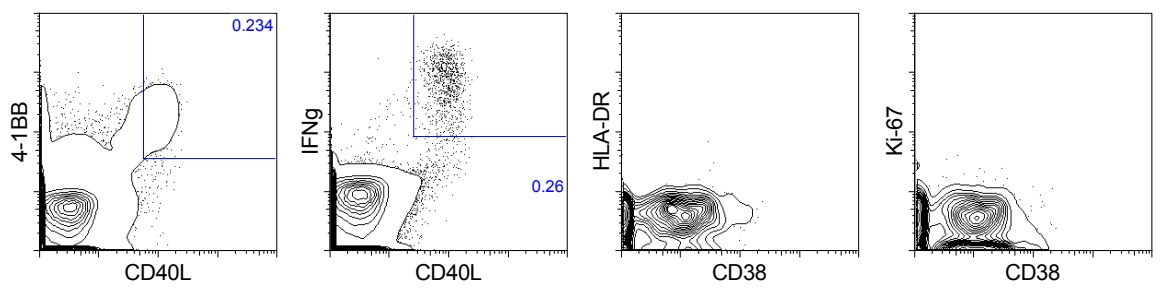

**HD08  
SEB/TSST1**

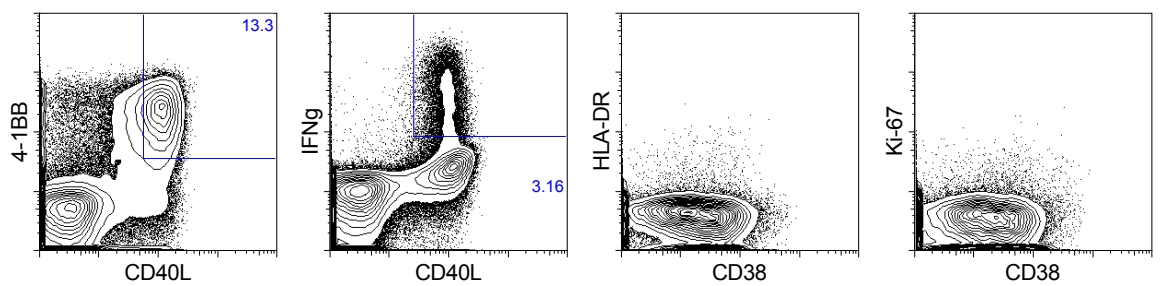

**HD09  
unstimulated**

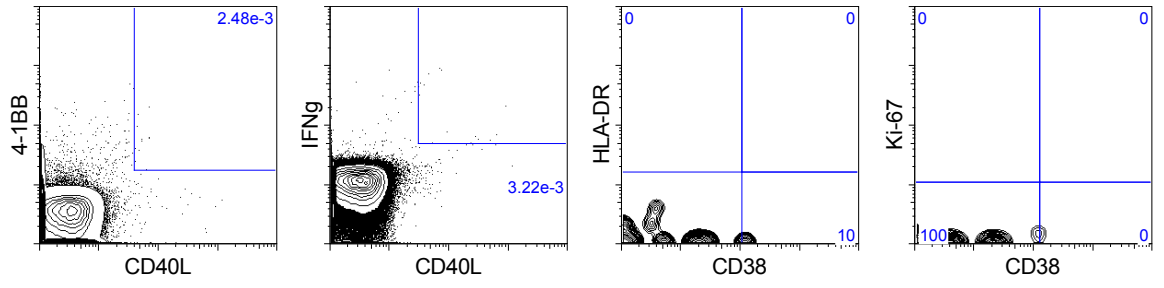

**HD09  
S-I (N-term)**

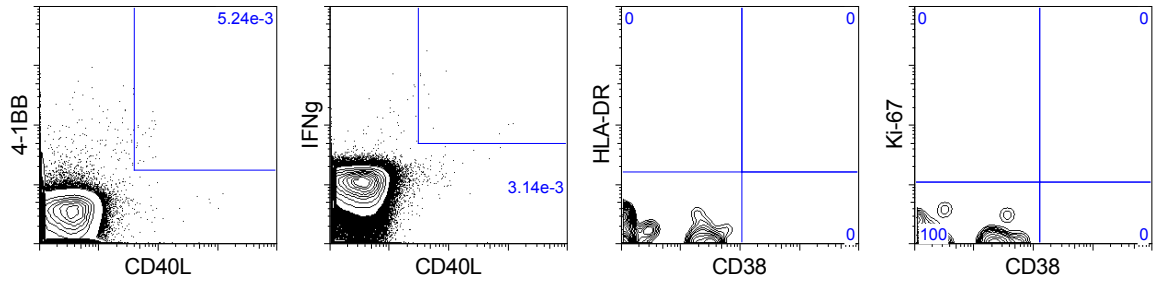

**HD09  
S-II (C-term)**

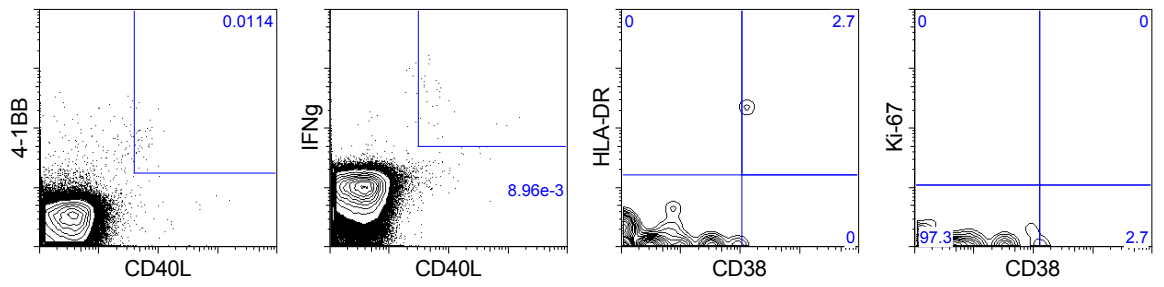

**HD09  
CMVpp65**

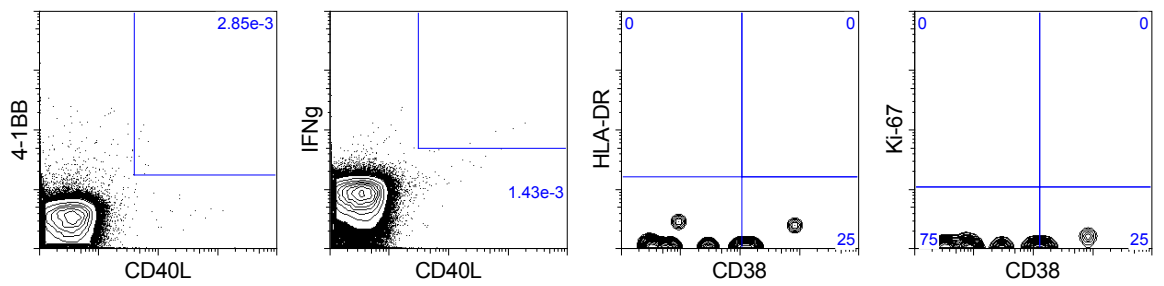

**HD09  
SEB/TSST1**

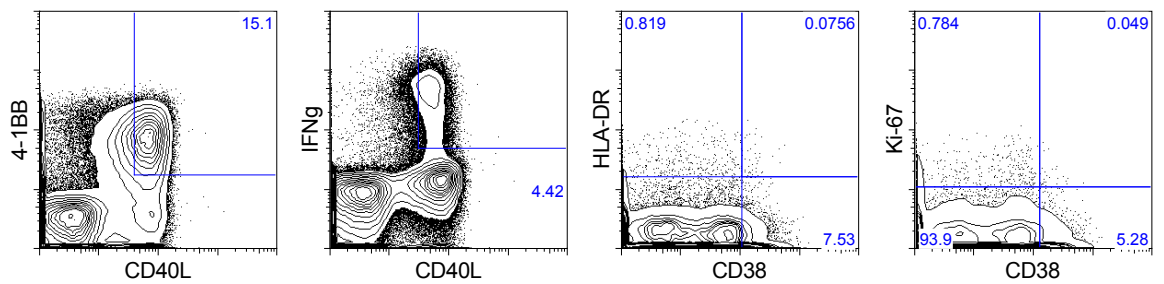

**HD10  
unstimulated**

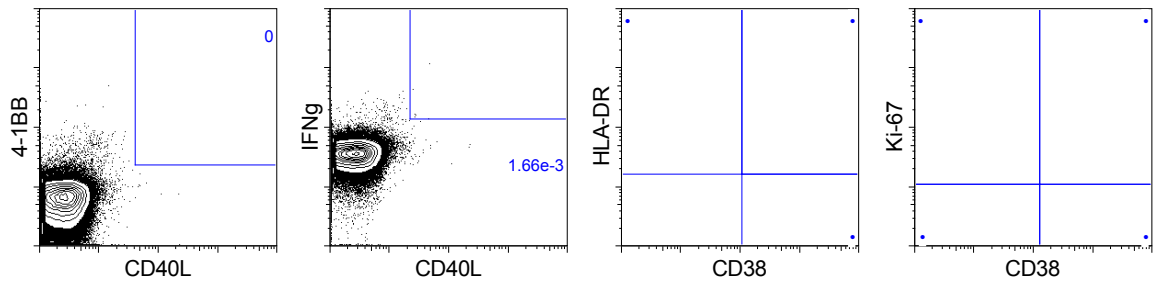

**HD10  
S-I (N-term)**

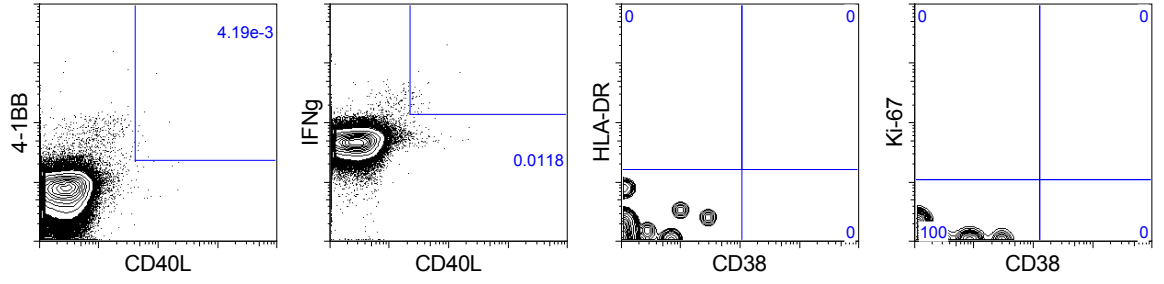

**HD10  
S-II (C-term)**

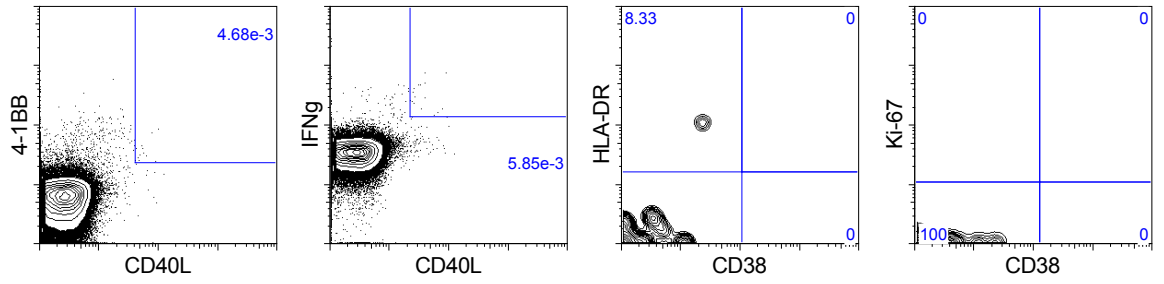

**HD10  
CMVpp65**

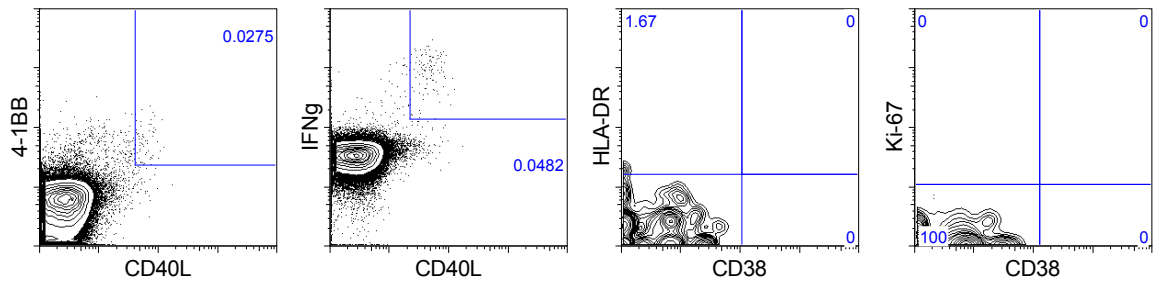

**HD10  
SEB/TSST1**

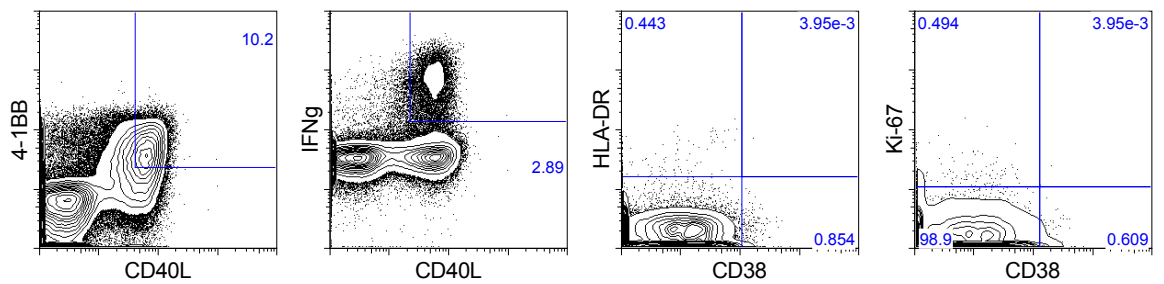

**HD11  
unstimulated**

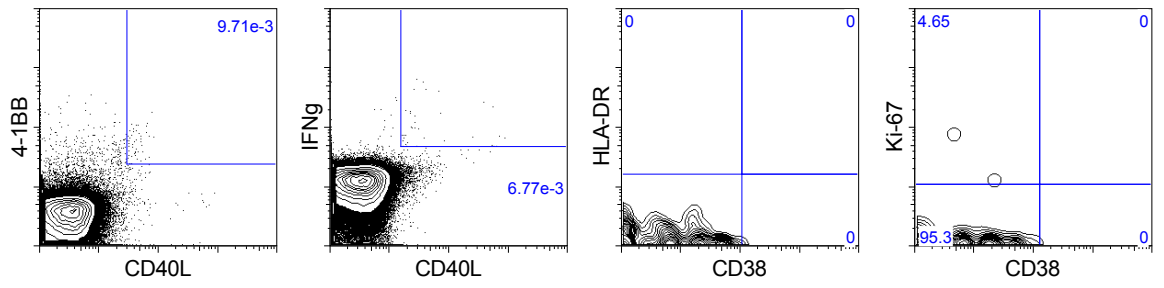

**HD11  
S-I (N-term)**

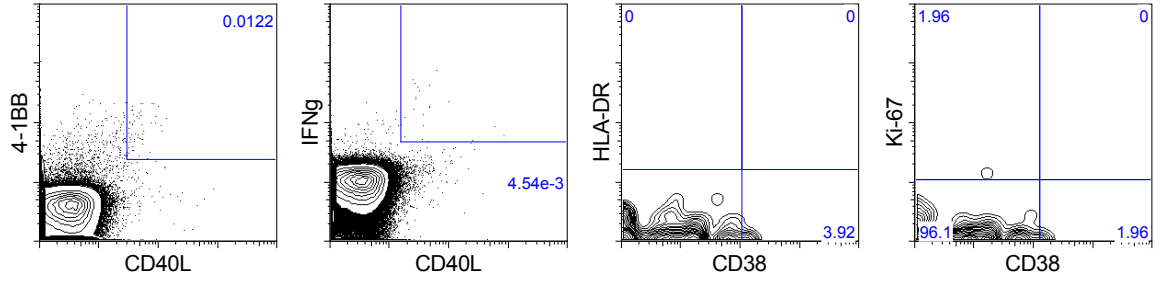

**HD11  
S-II (C-term)**

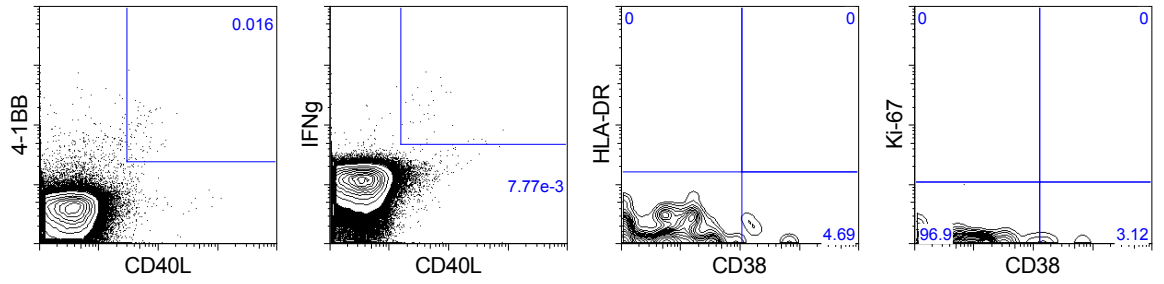

**HD11  
CMVpp65**

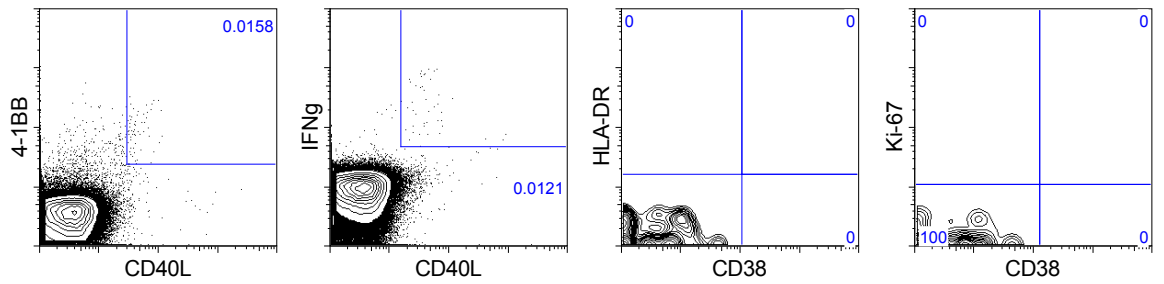

**HD11  
SEB/TSST1**

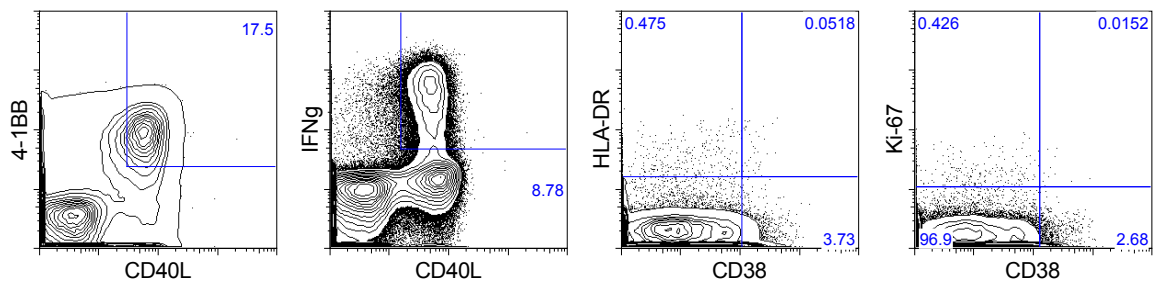

**HD12  
unstimulated**

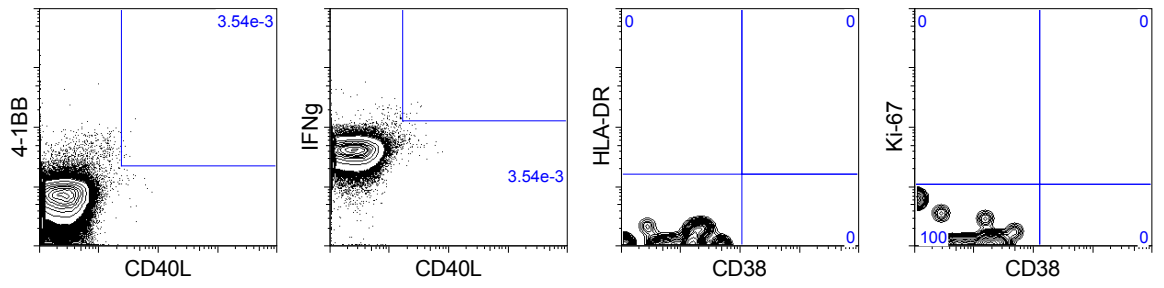

**HD12  
S-I (N-term)**

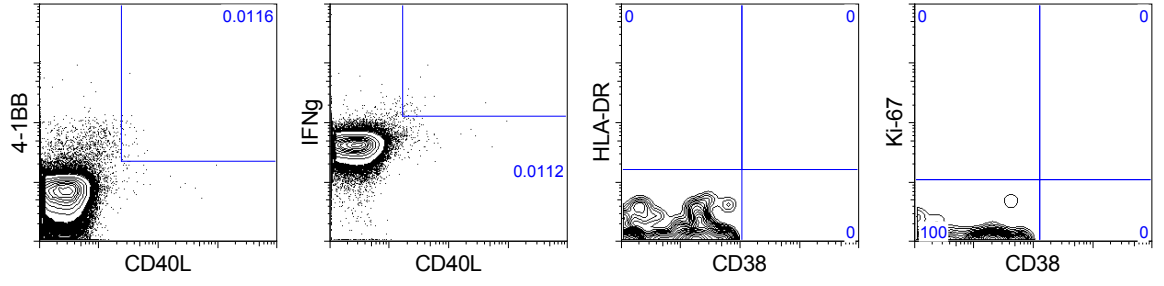

**HD12  
S-II (C-term)**

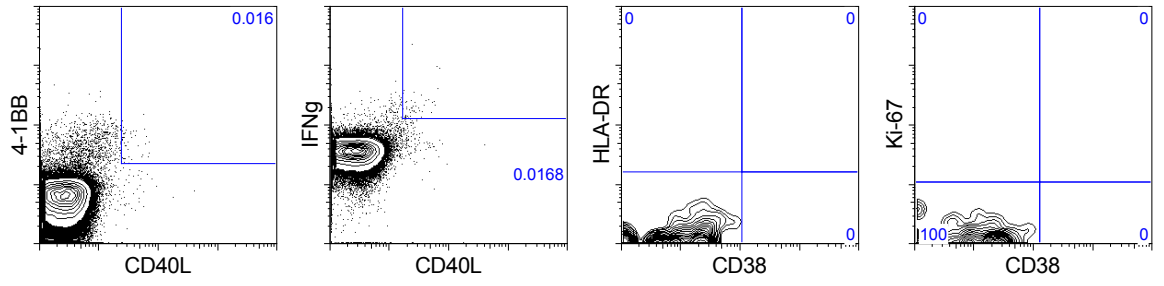

**HD12  
CMVpp65**

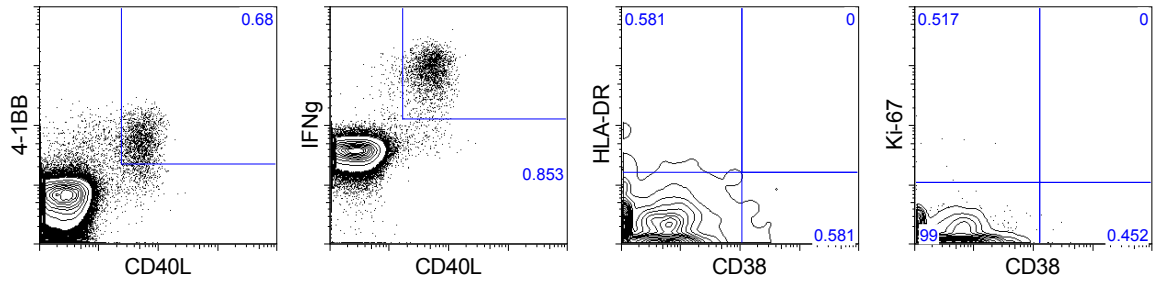

**HD12  
SEB/TSST1**

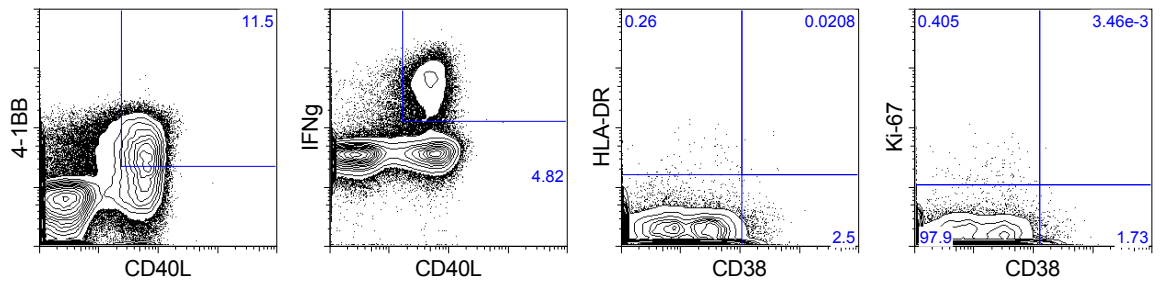



**HD13  
unstimulated**

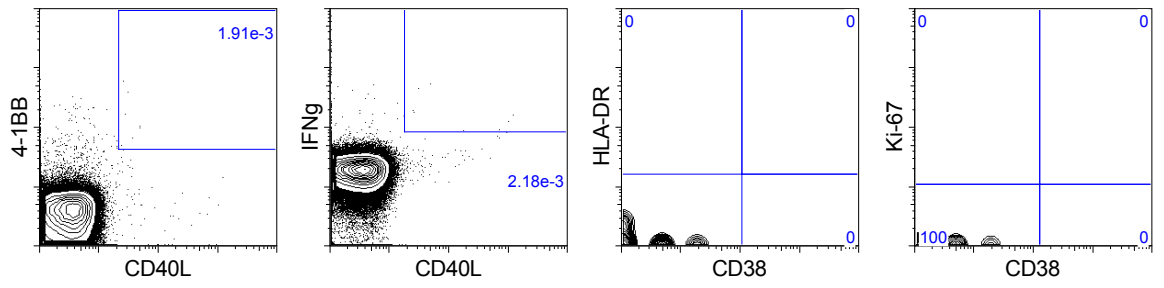

**HD13  
S-I (N-term)**

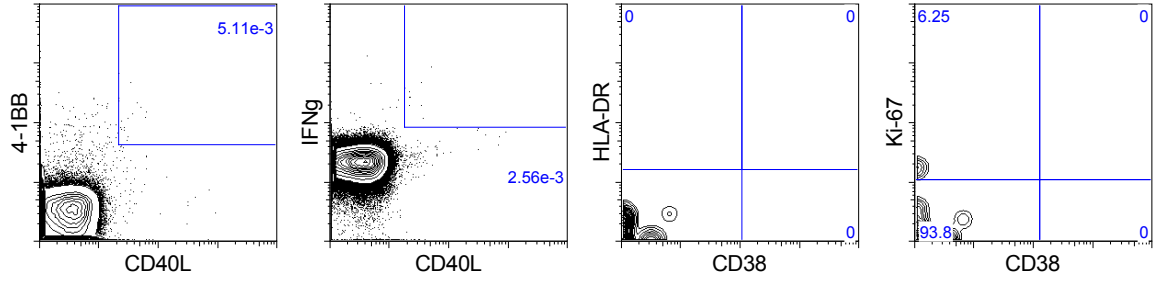

**HD13  
S-II (C-term)**

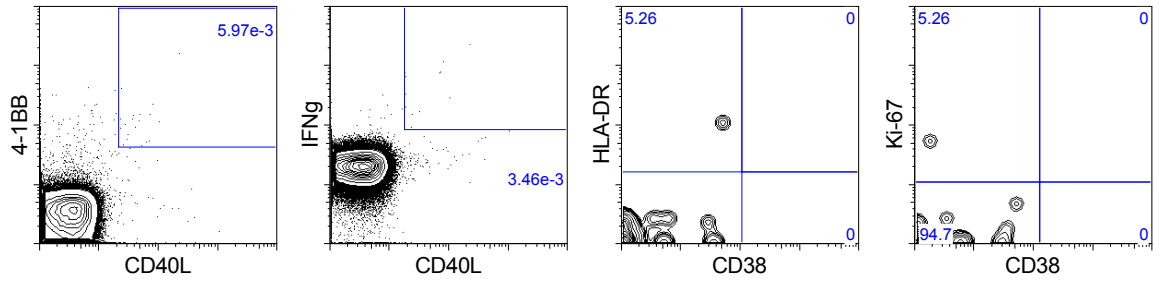

**HD13  
CMVpp65**

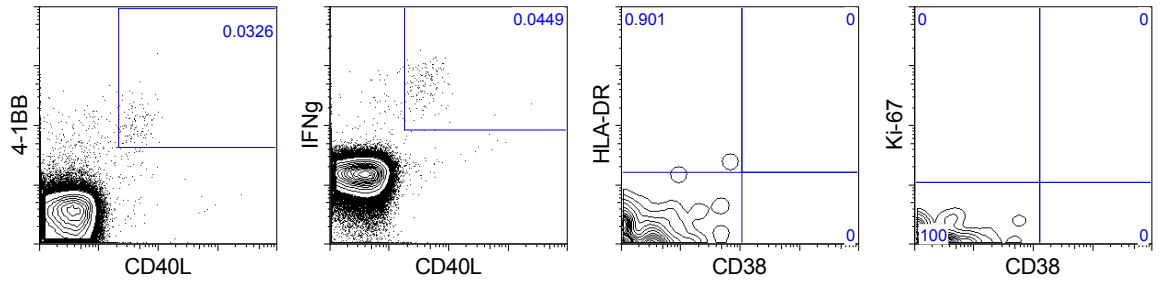

**HD13  
SEB/TSST1**

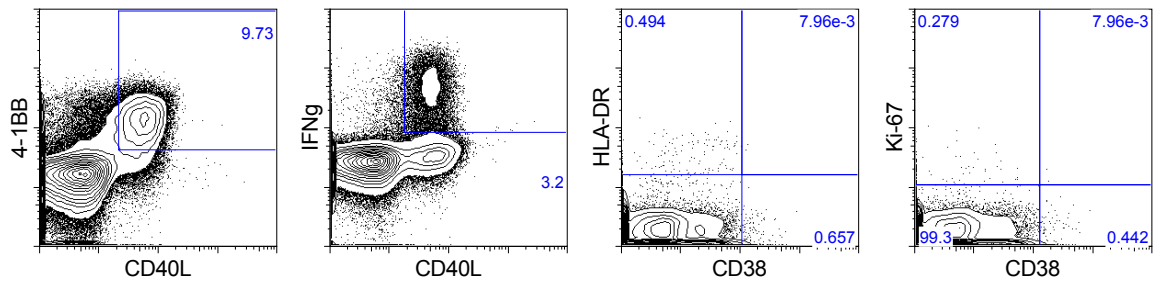

**HD14  
unstimulated**

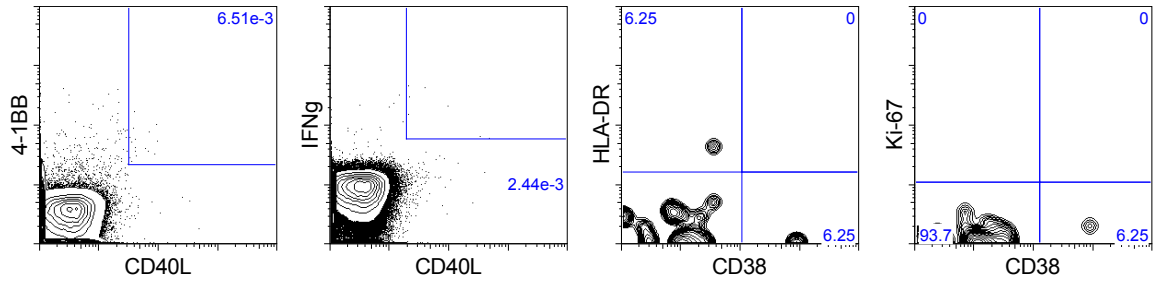

**HD14  
S-I (N-term)**

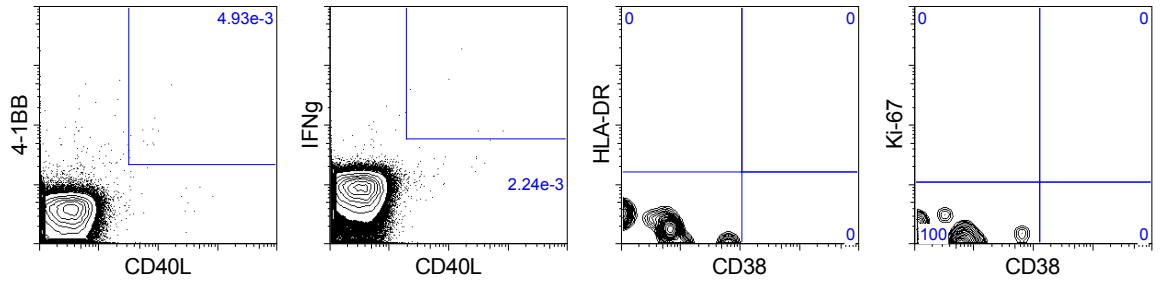

**HD14  
S-II (C-term)**

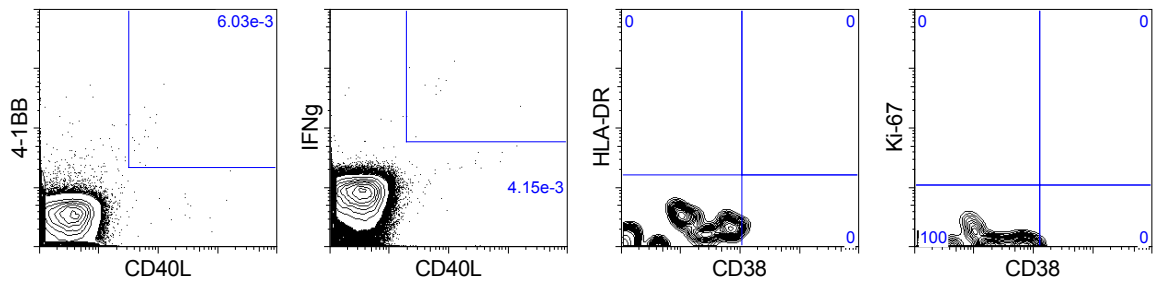

**HD14  
CMVpp65**

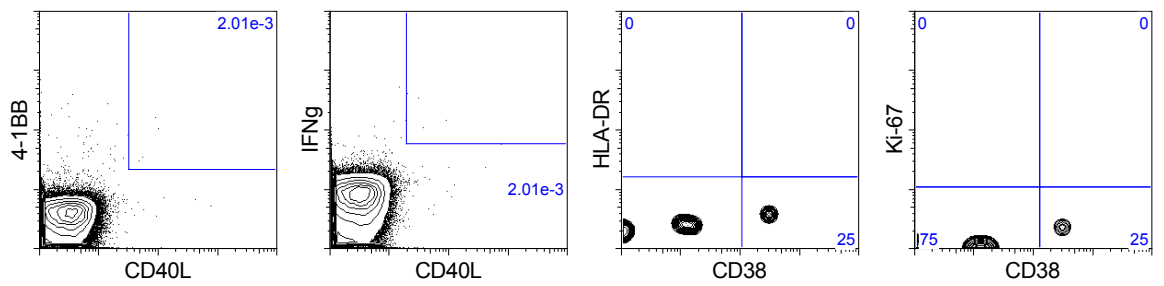

**HD14  
SEB/TSST1**

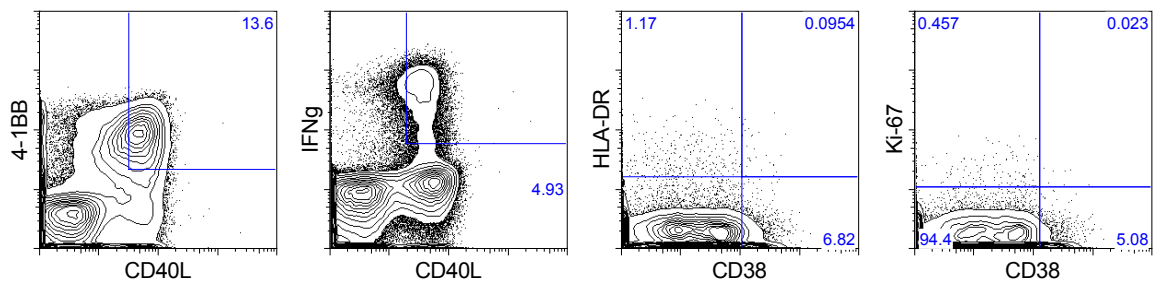

**HD17  
unstimulated**

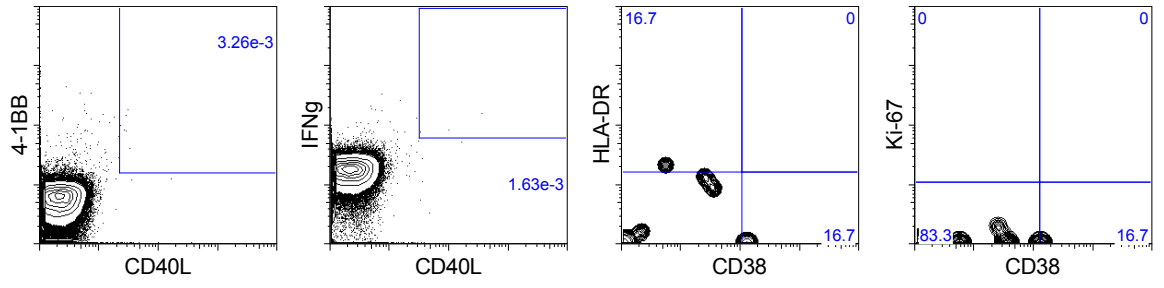

**HD17  
S-I (N-term)**

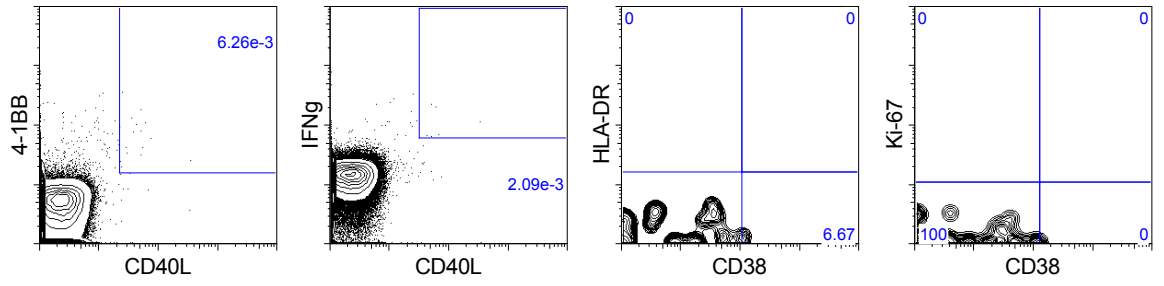

**HD17  
S-II (C-term)**

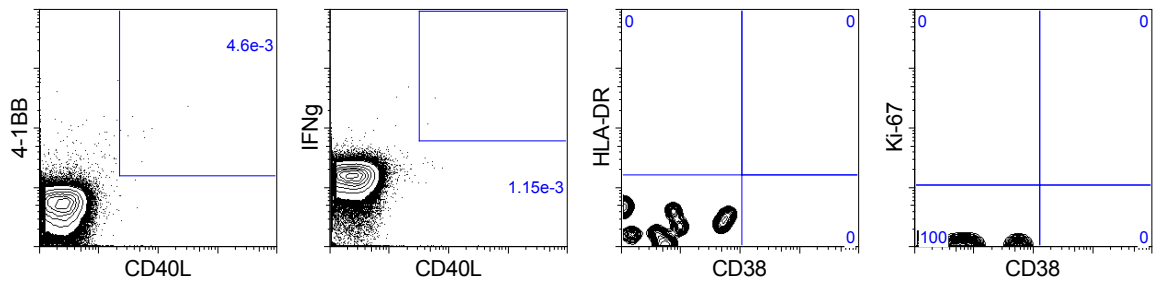

**HD17  
CMVpp65**

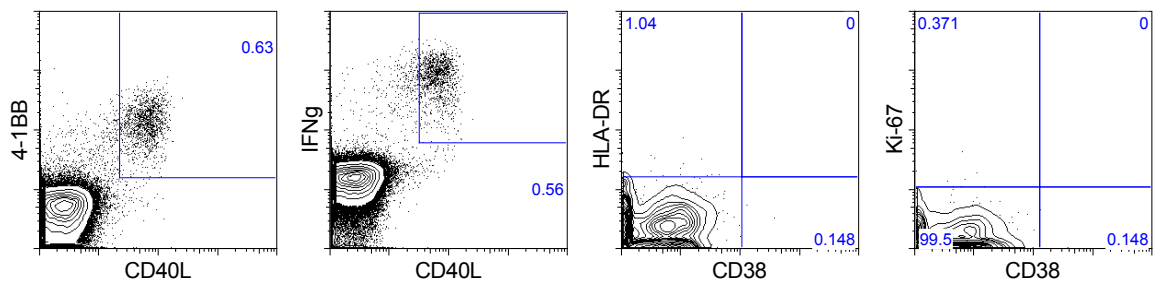

**HD17  
SEB/TSST1**

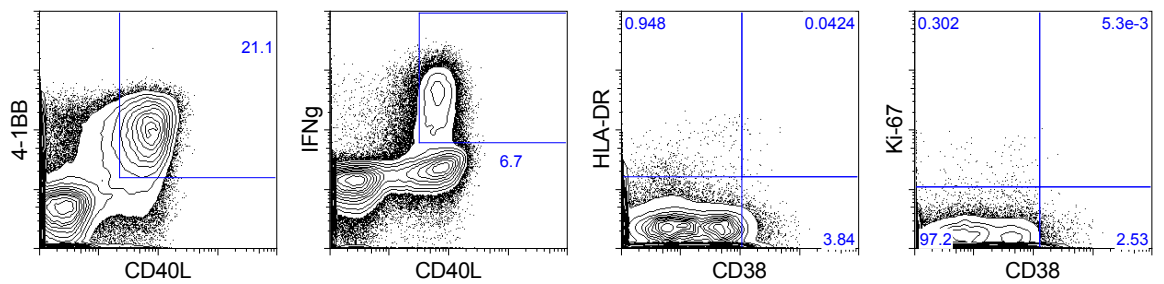

**HD18  
unstimulated**

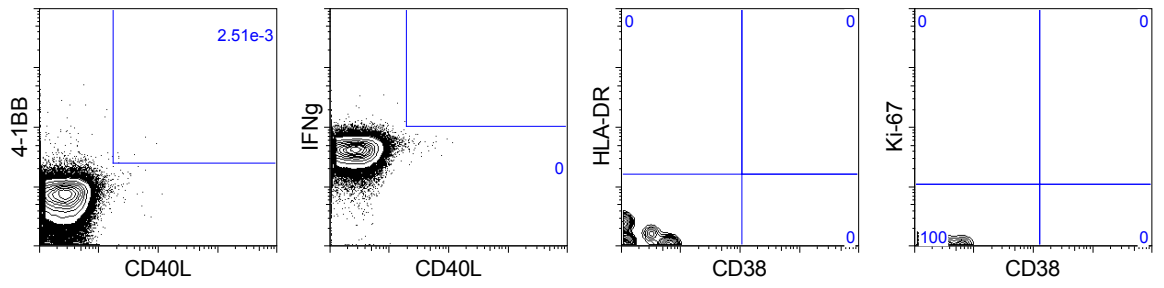

**HD18  
S-I (N-term)**

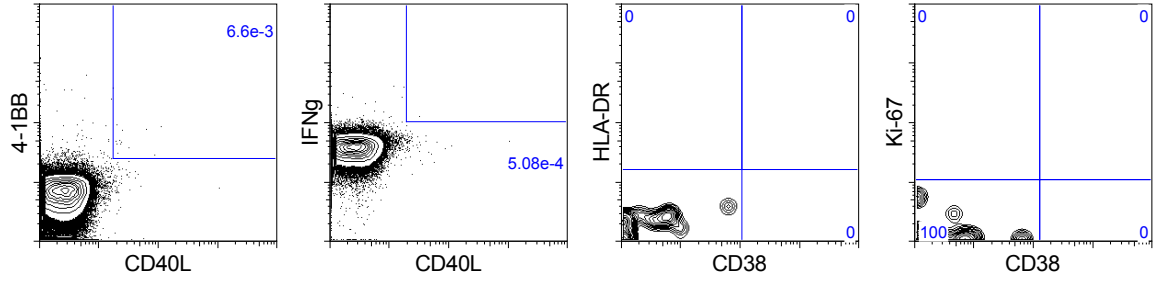

**HD18  
S-II (C-term)**

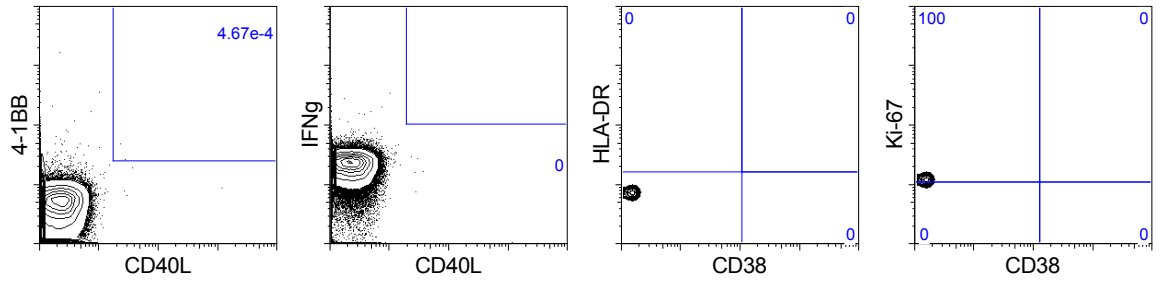

**HD18  
CMVpp65**

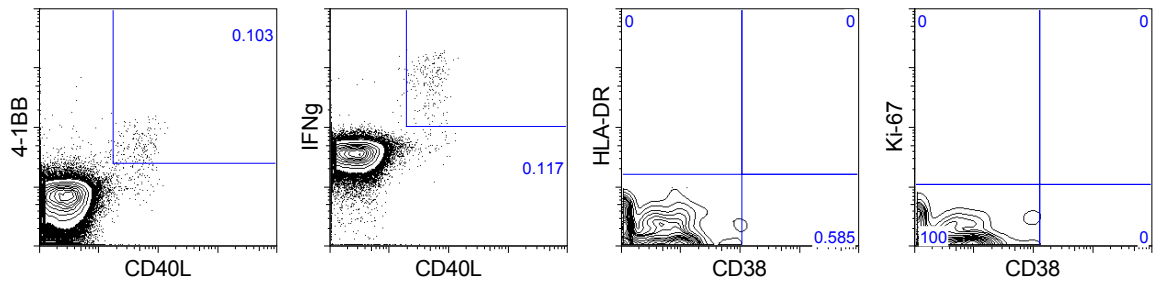

**HD18  
SEB/TSST1**

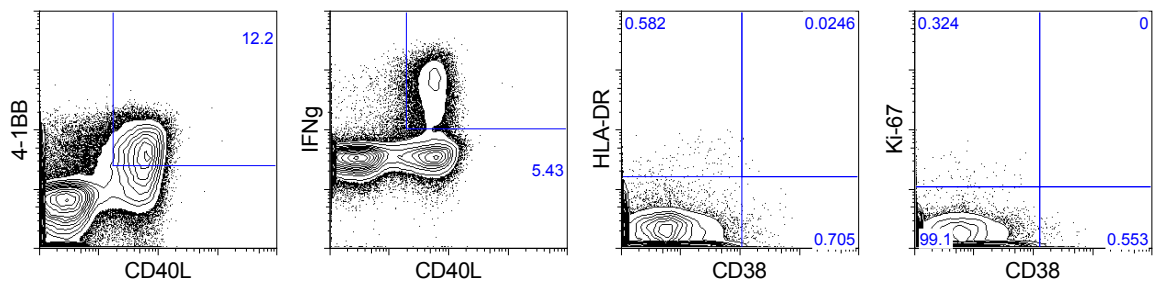

**HD19  
unstimulated**

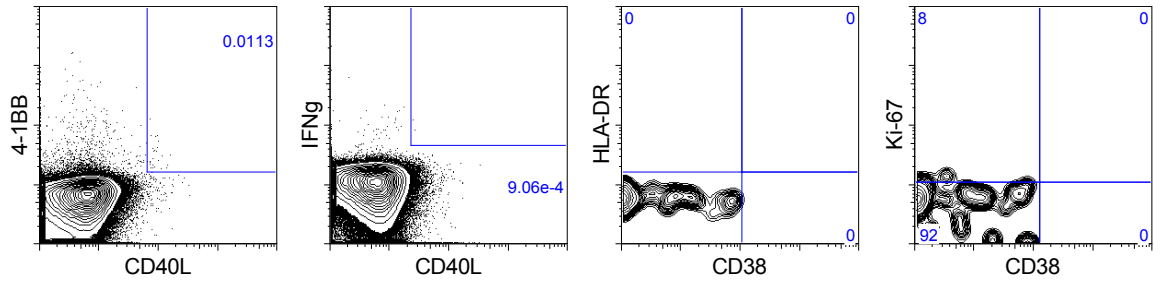

**HD19  
S-I (N-term)**

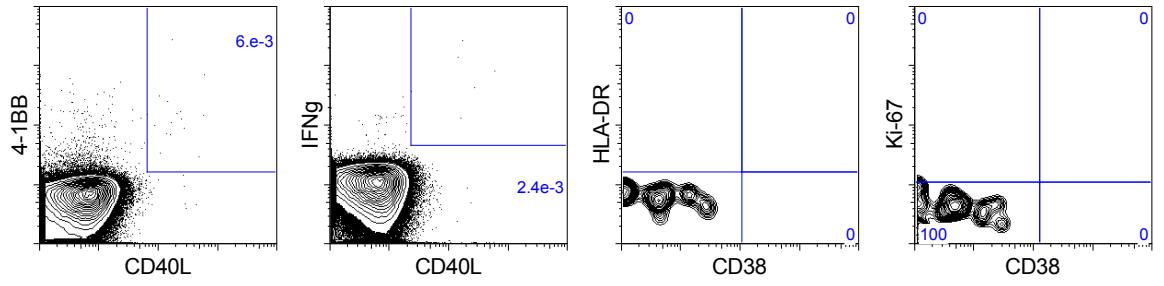

**HD19  
S-II (C-term)**

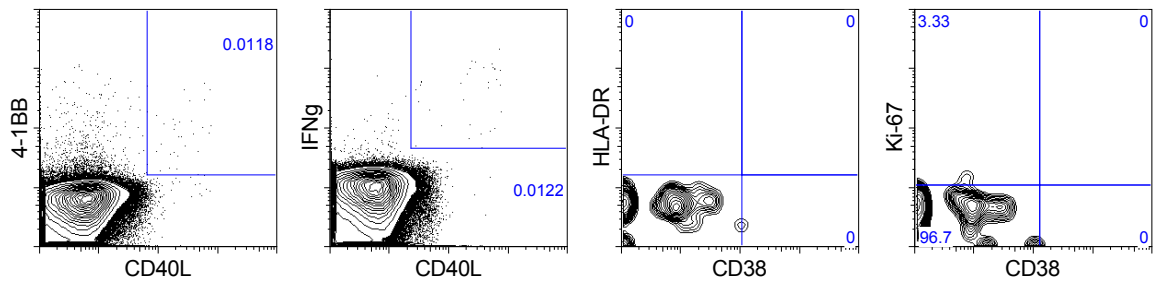

**HD19  
CMVpp65**

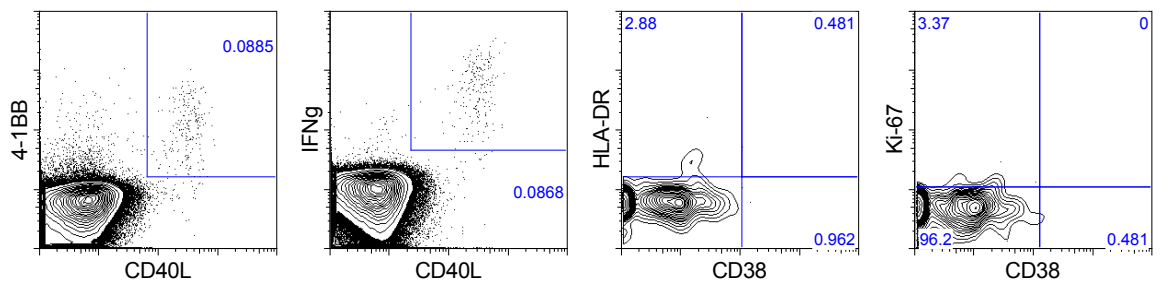

**HD19  
SEB/TSST1**

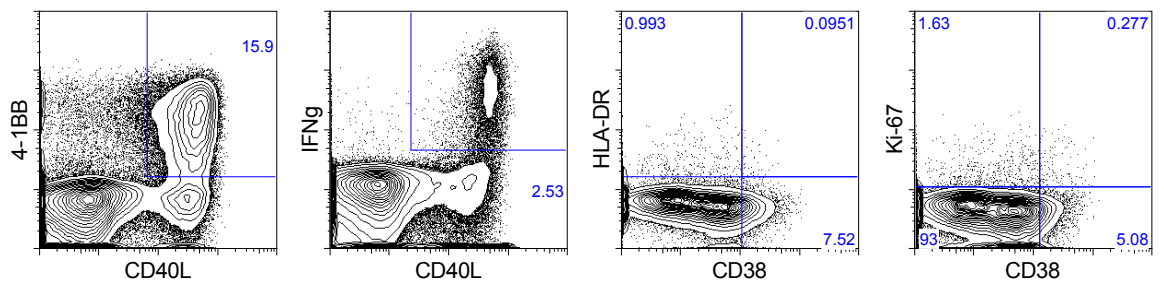

**HD23  
unstimulated**

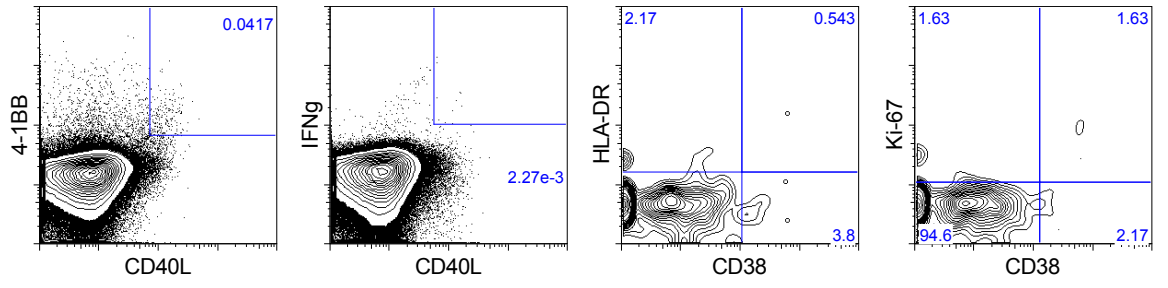

**HD23  
S-I (N-term)**

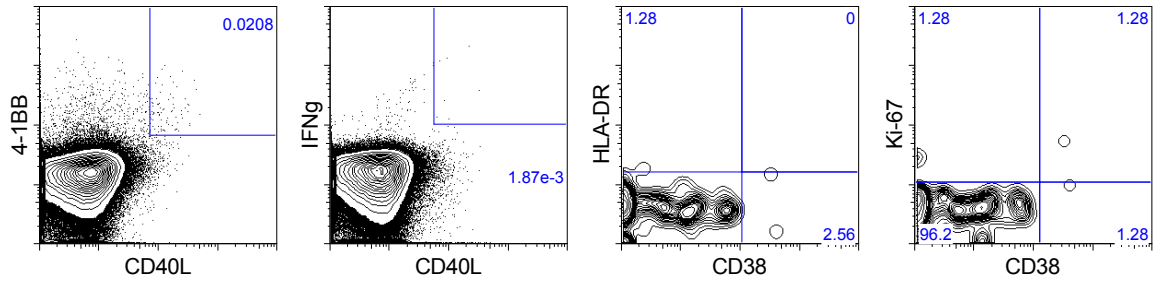

**HD23  
S-II (C-term)**

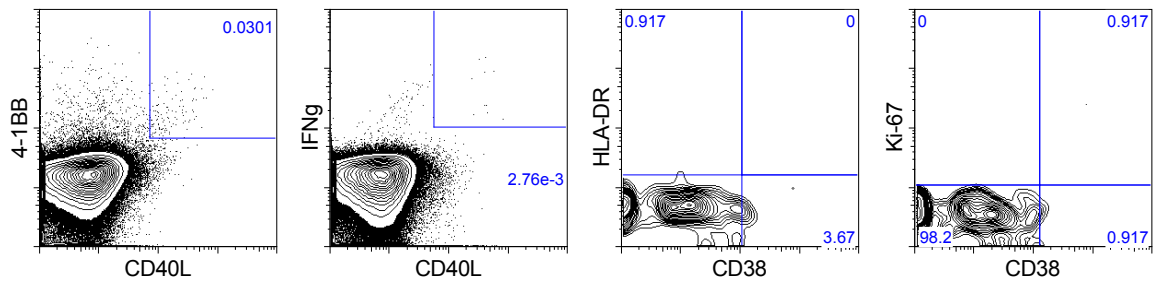

**HD23  
CMVpp65**

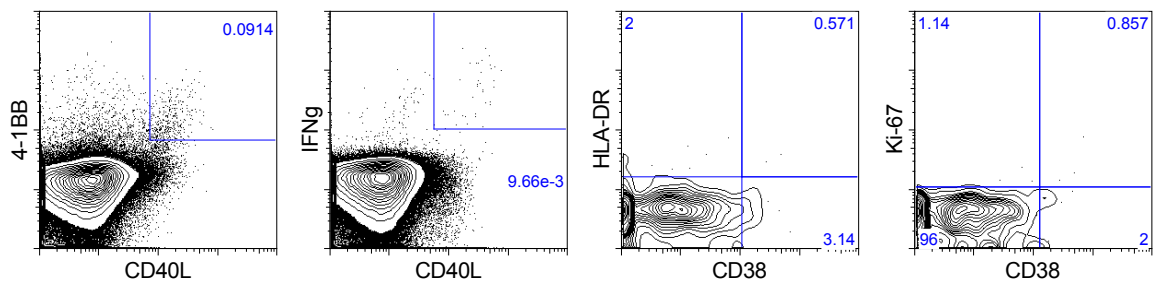

**HD23  
SEB/TSST1**

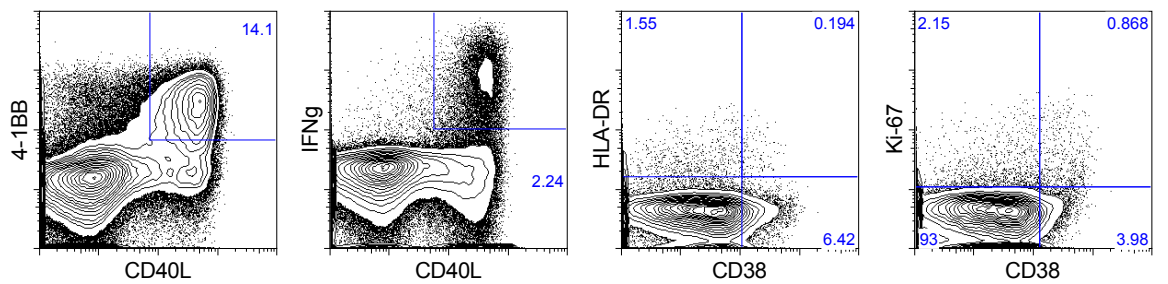

**HD24  
unstimulated**

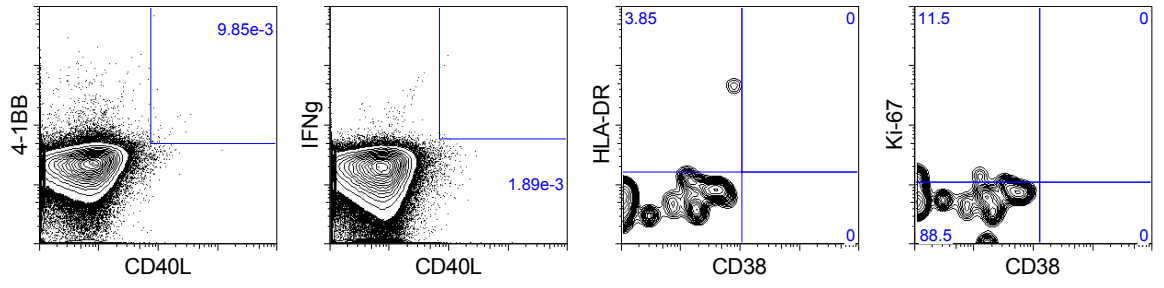

**HD24  
S-I (N-term)**

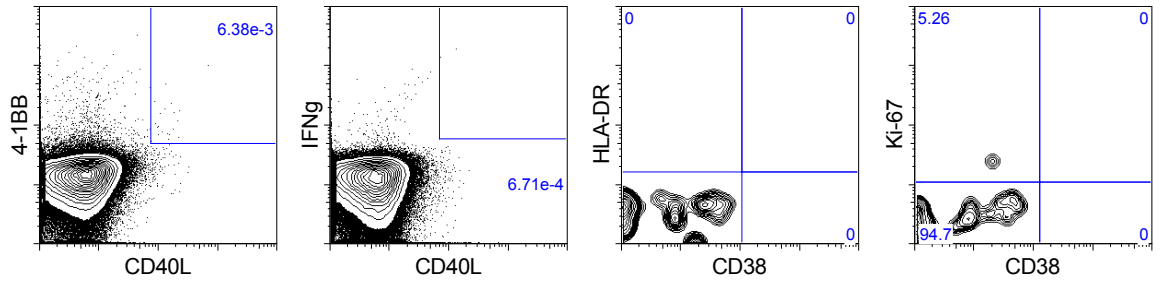

**HD24  
S-II (C-term)**

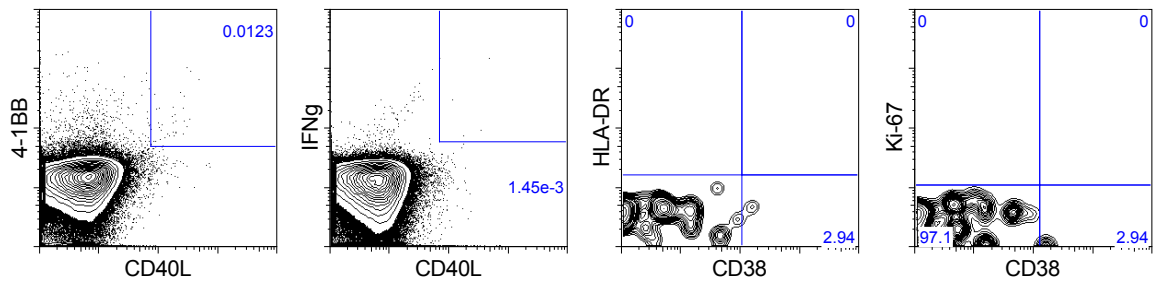

**HD24  
CMVpp65**

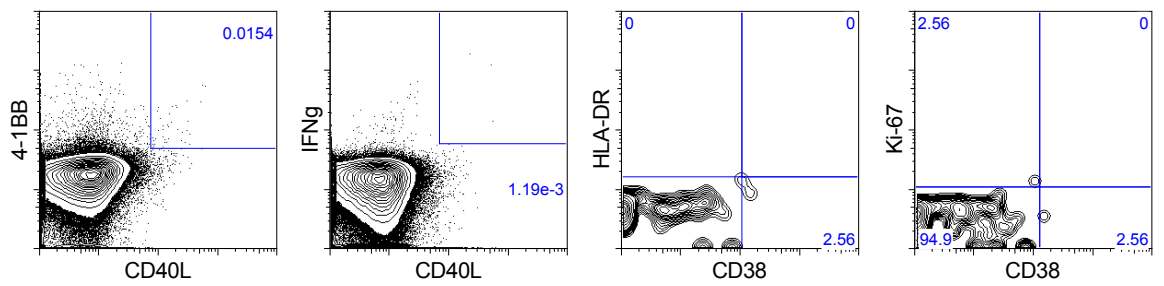

**HD24  
SEB/TSST1**

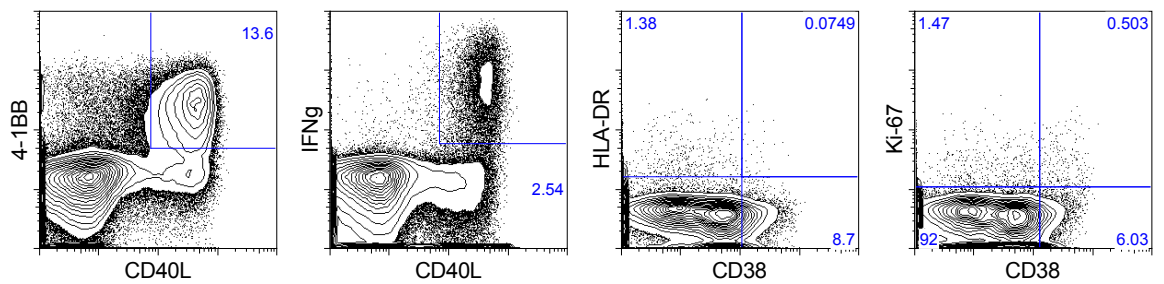



**HD25  
unstimulated**

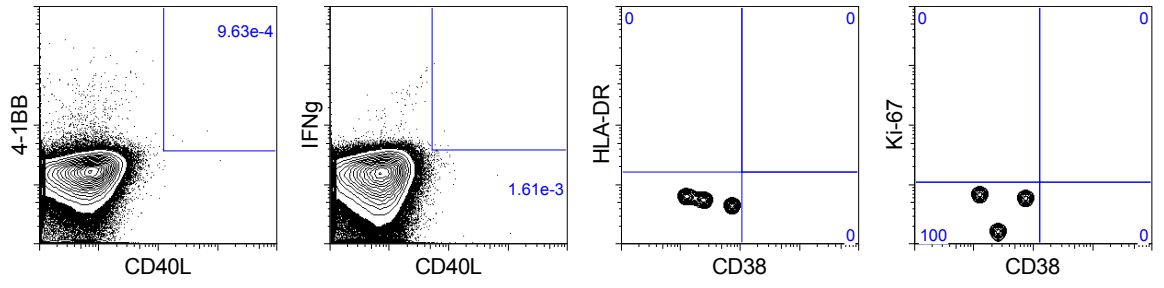

**HD25  
S-I (N-term)**

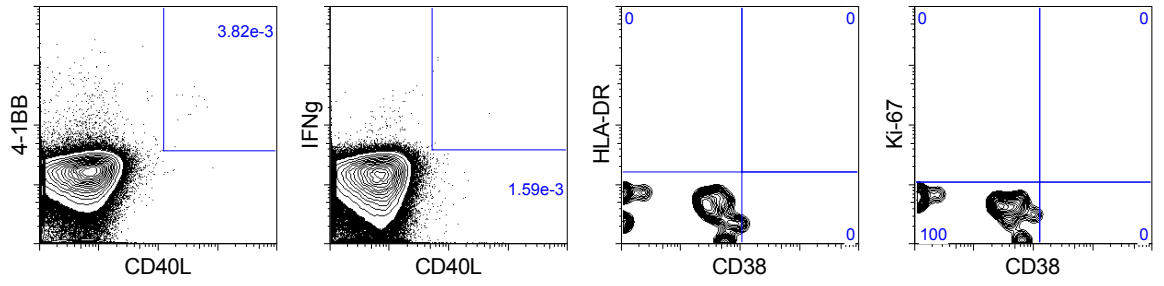

**HD25  
S-II (C-term)**

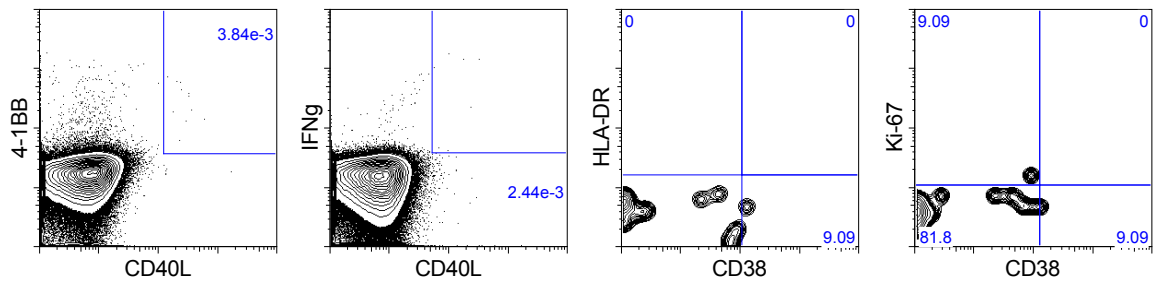

**HD25  
CMVpp65**

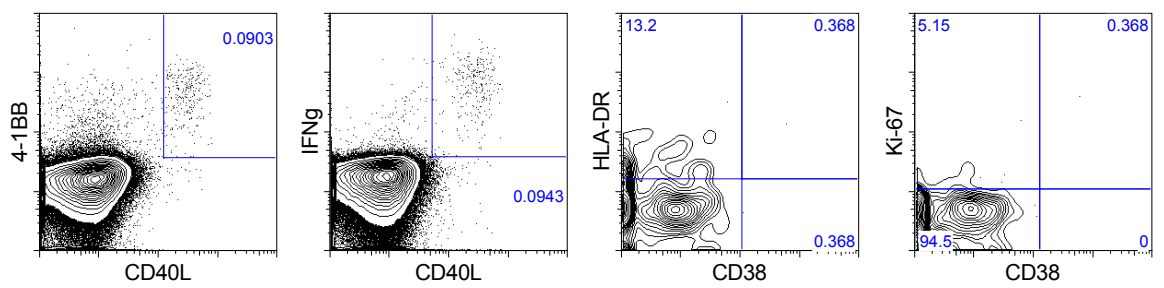

**HD25  
SEB/TSST1**

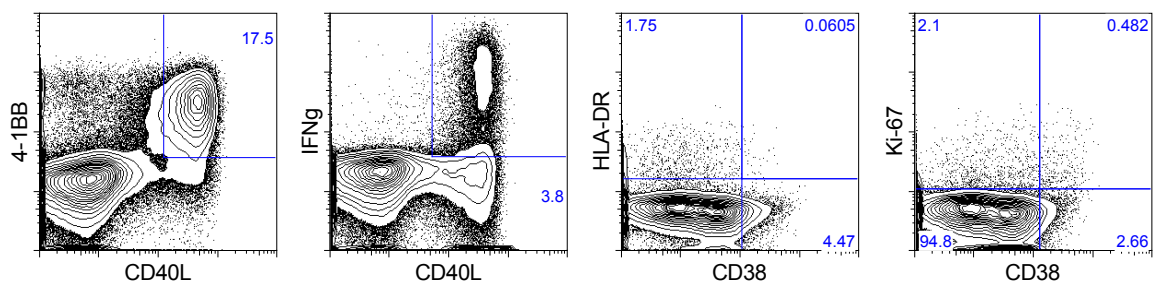



**HD26  
unstimulated**

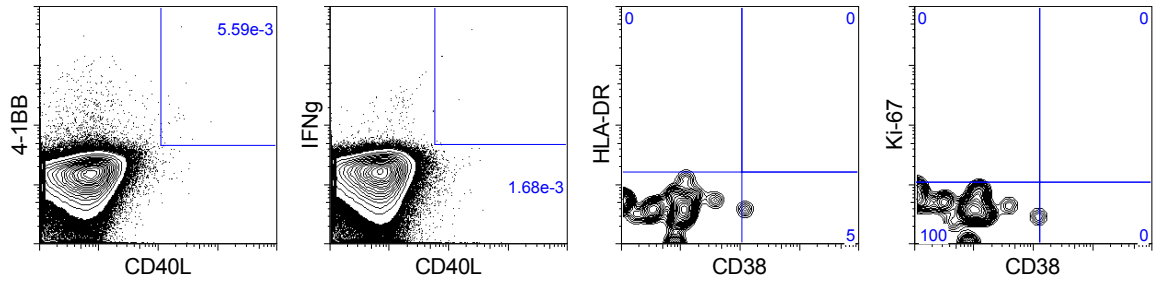

**HD26  
S-I (N-term)**

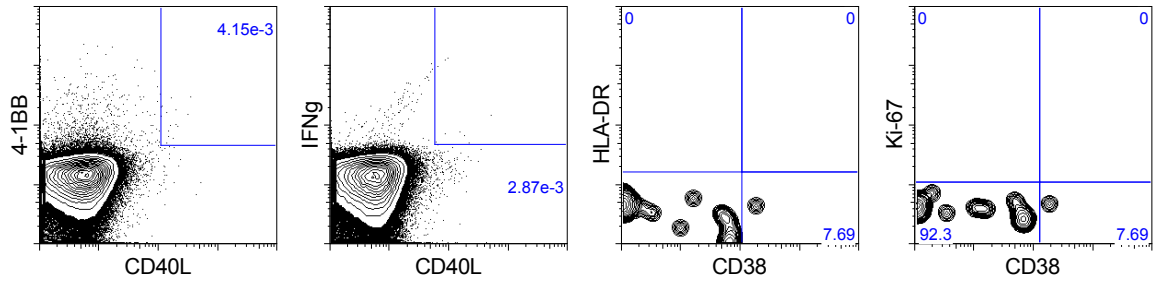

**HD26  
S-II (C-term)**

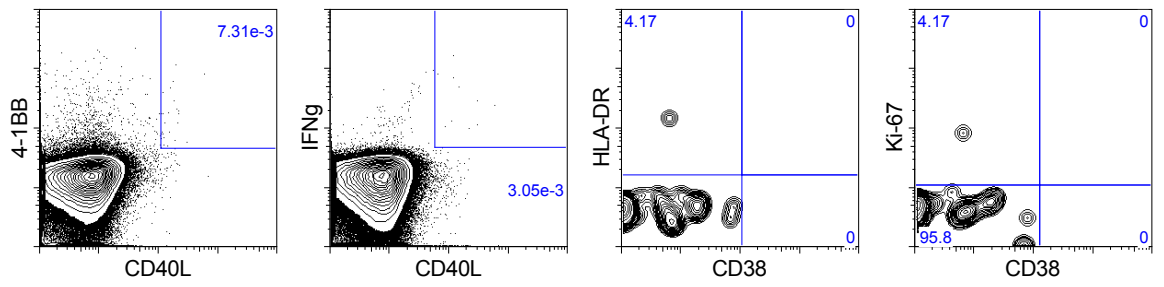

**HD26  
CMVpp65**

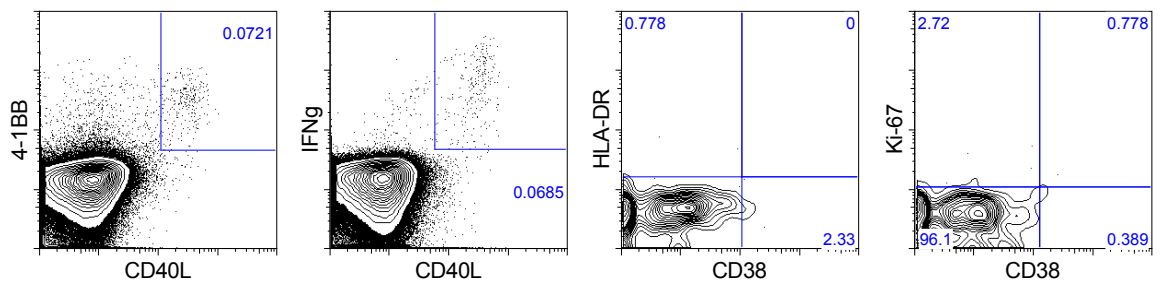

**HD26  
SEB/TSST1**

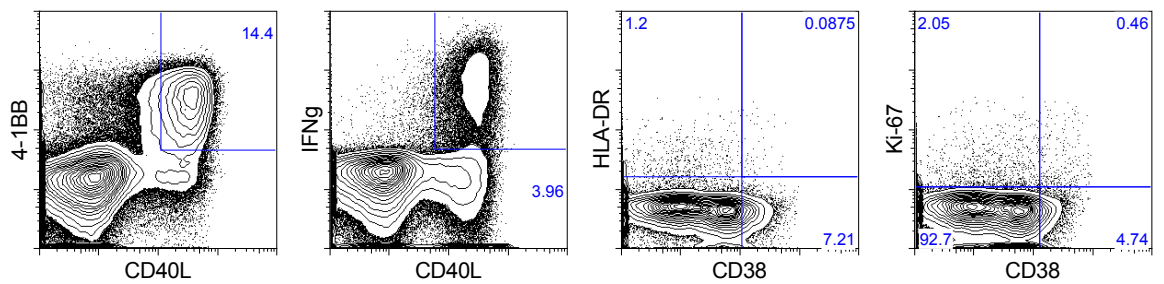

**HD27  
unstimulated**

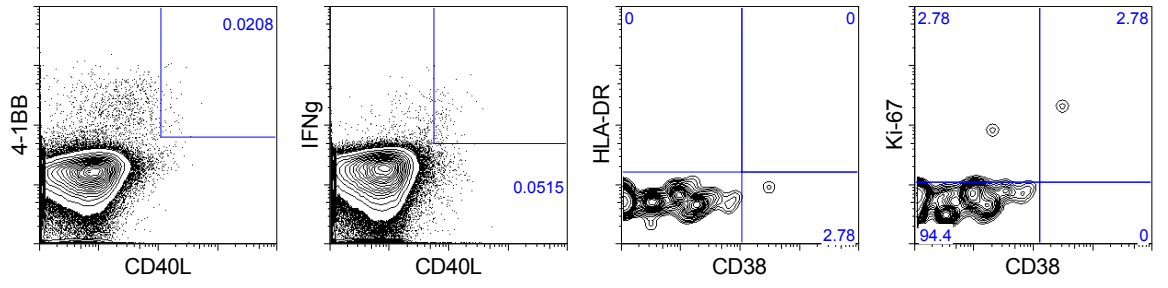

**HD27  
S-I (N-term)**

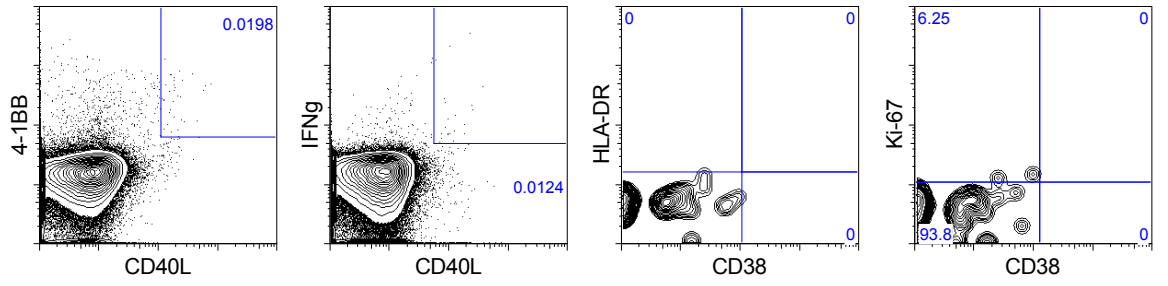

**HD27  
S-II (C-term)**

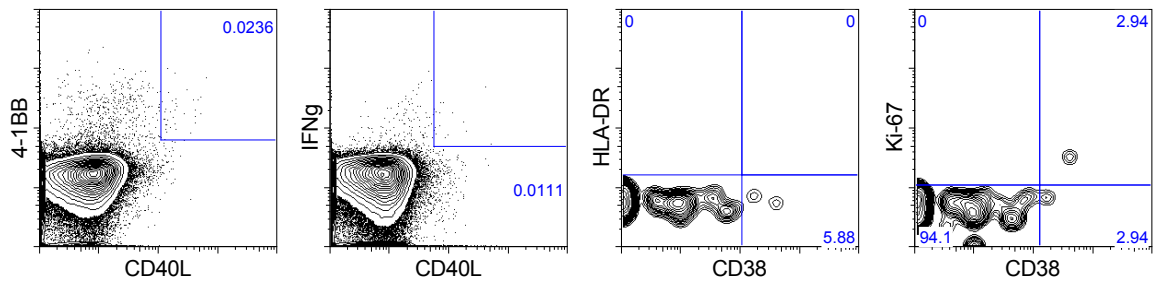

**HD27  
CMVpp65**

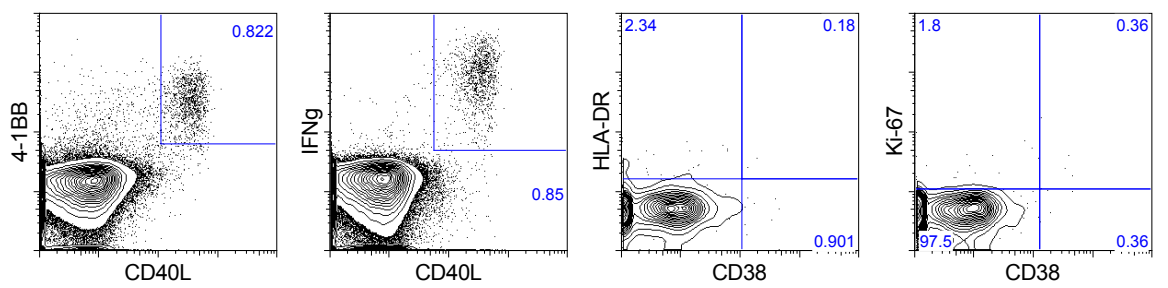

**HD27  
SEB/TSST1**

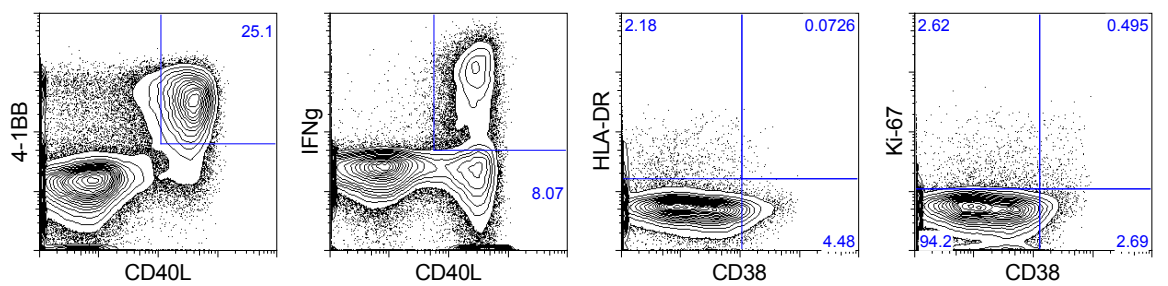

**HD28  
unstimulated**

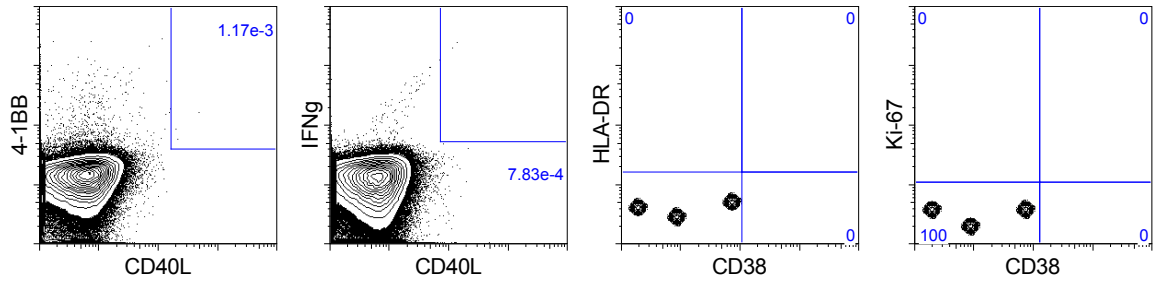

**HD28  
S-I (N-term)**

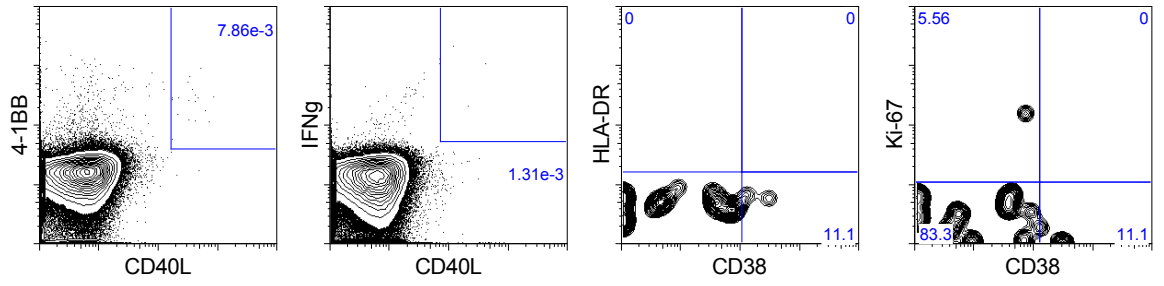

**HD28  
S-II (C-term)**

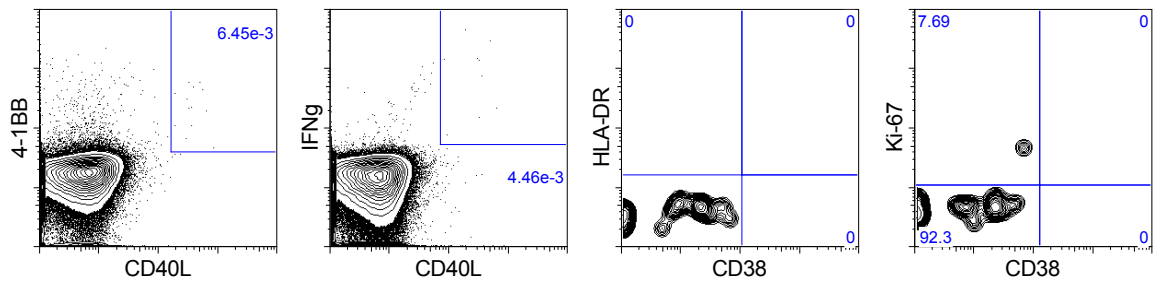

**HD28  
CMVpp65**

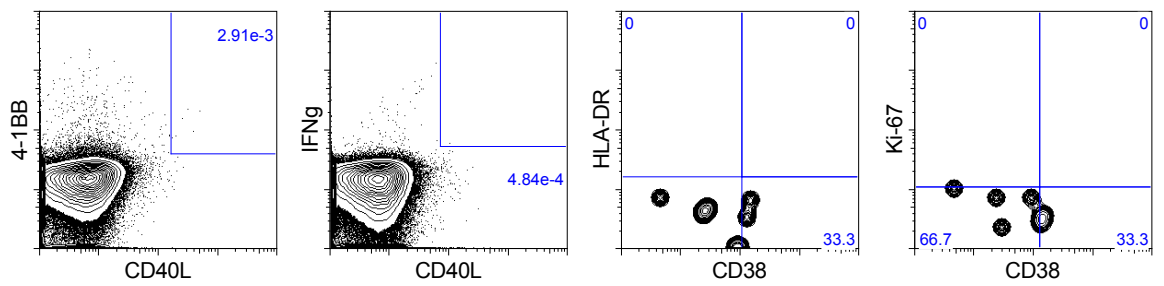

**HD28  
SEB/TSST1**

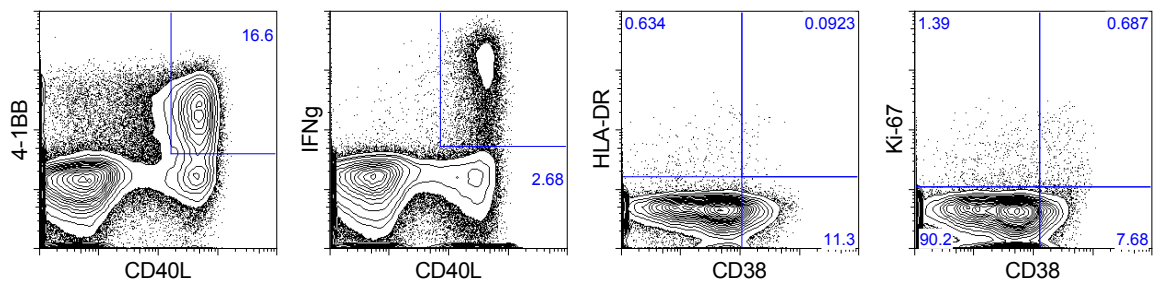

**HD29  
unstimulated**

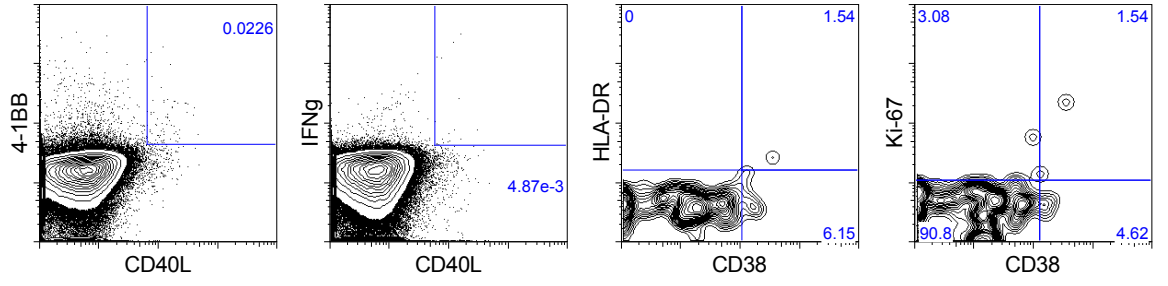

**HD29  
S-I (N-term)**

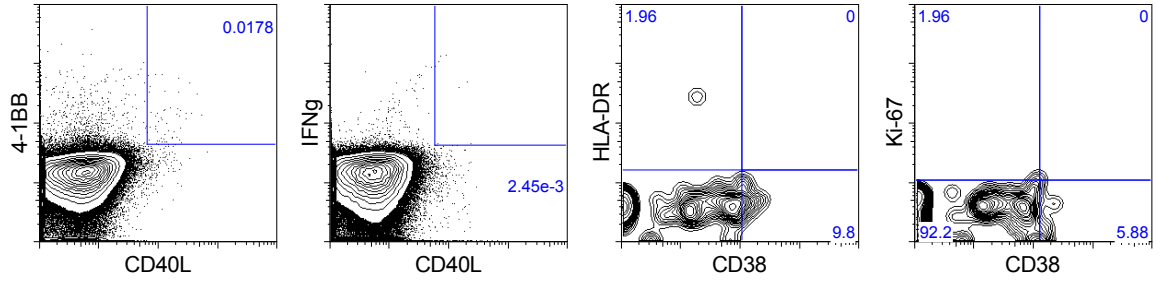

**HD29  
S-II (C-term)**

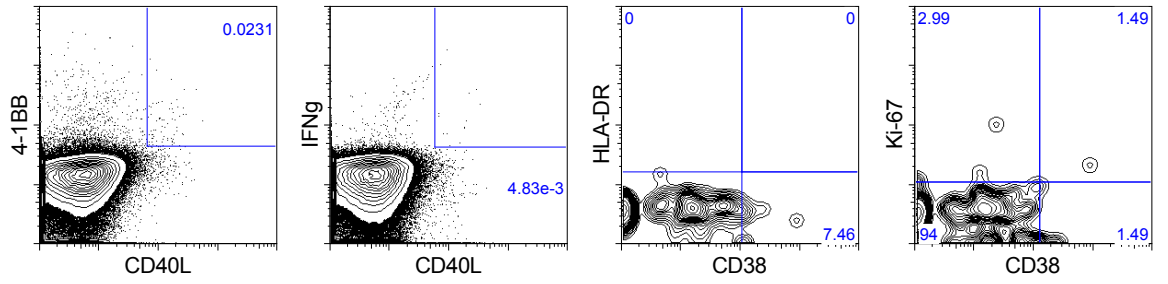

**HD29  
CMVpp65**

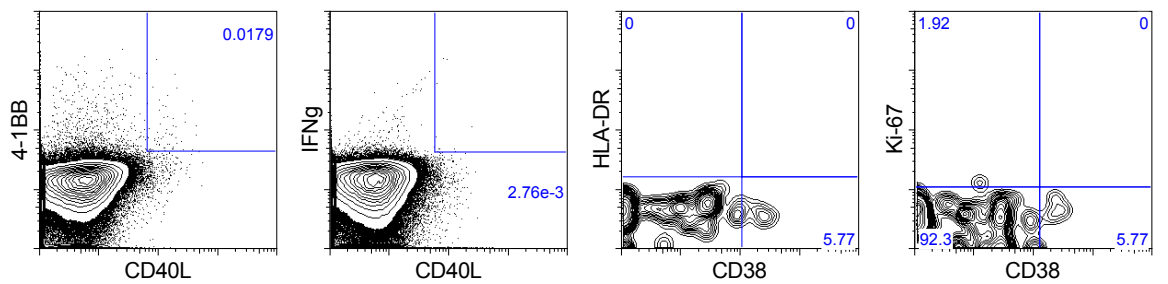

**HD29  
SEB/TSST1**

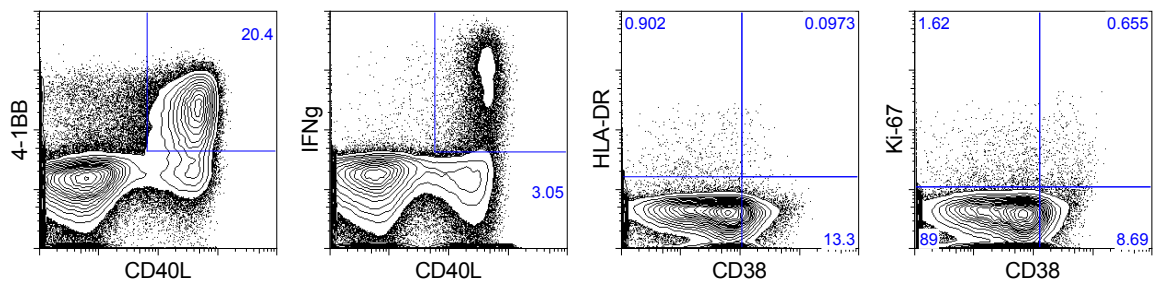

**HD40  
unstimulated**

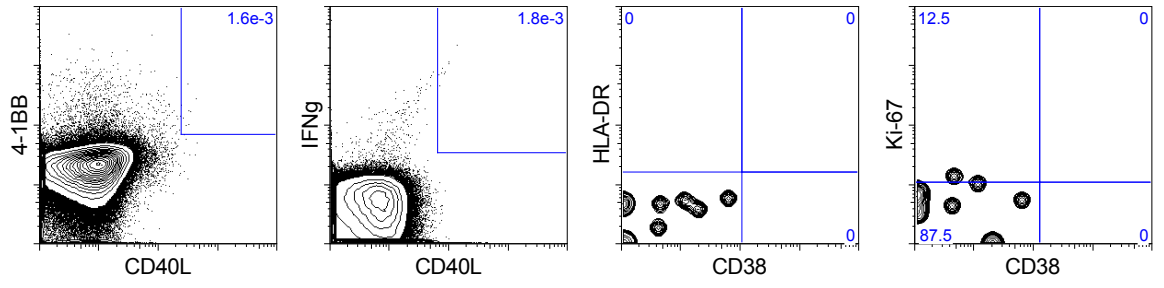

**HD40  
S-I (N-term)**

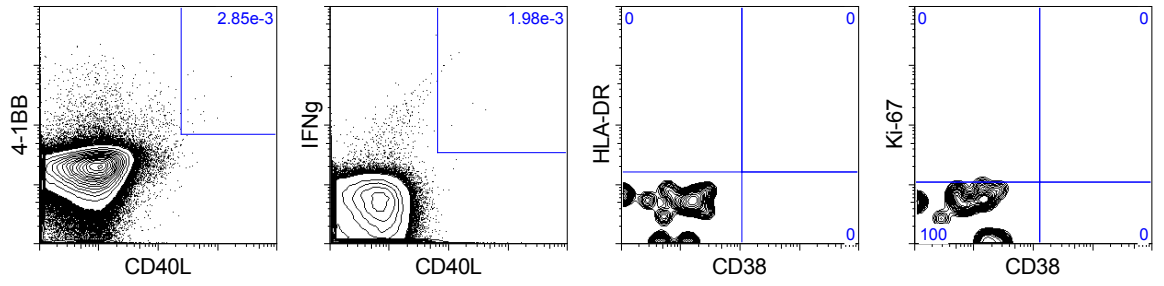

**HD40  
S-II (C-term)**

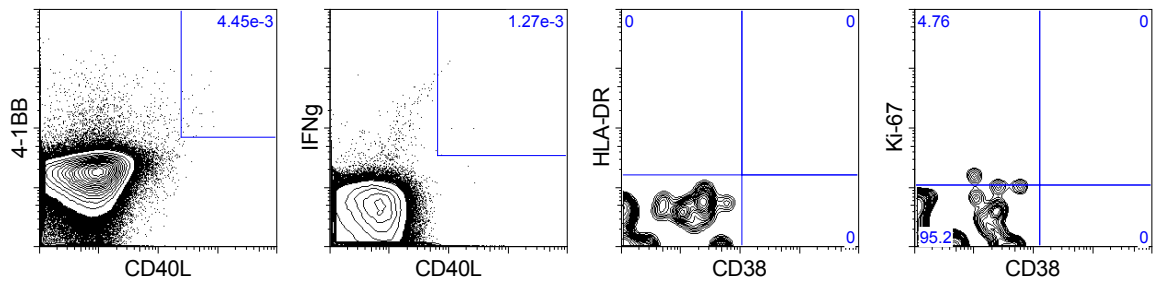

**HD40  
CMVpp65**

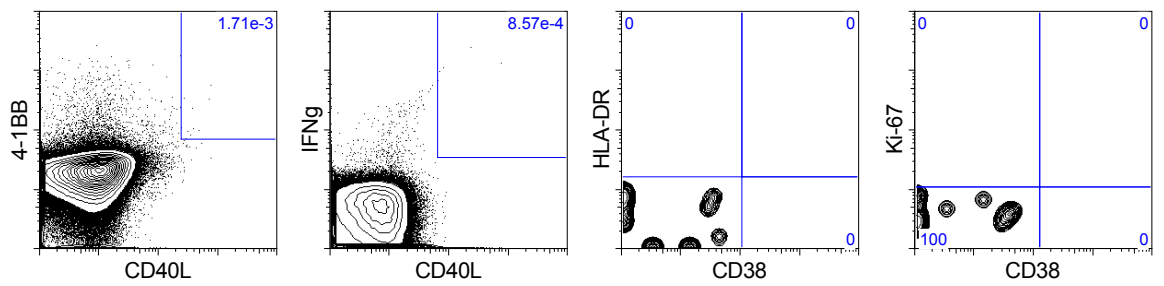

**HD40  
SEB/TSST1**

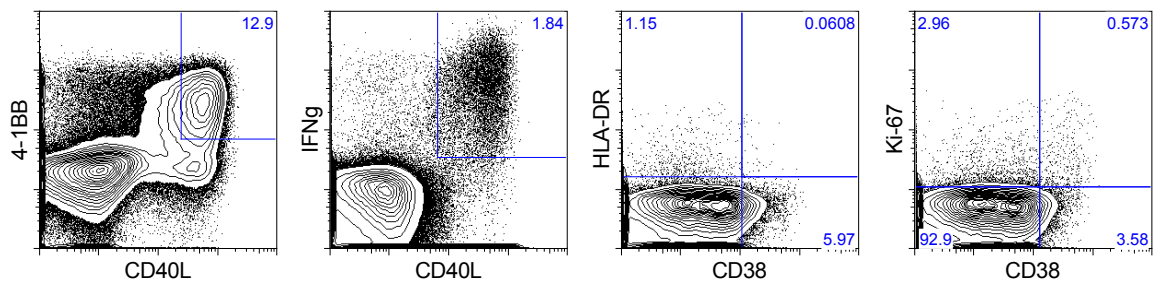

**HD42  
unstimulated**

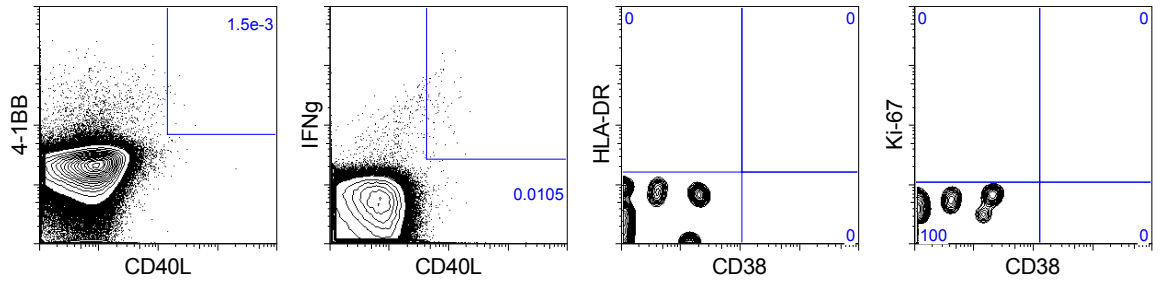

**HD42  
S-I (N-term)**

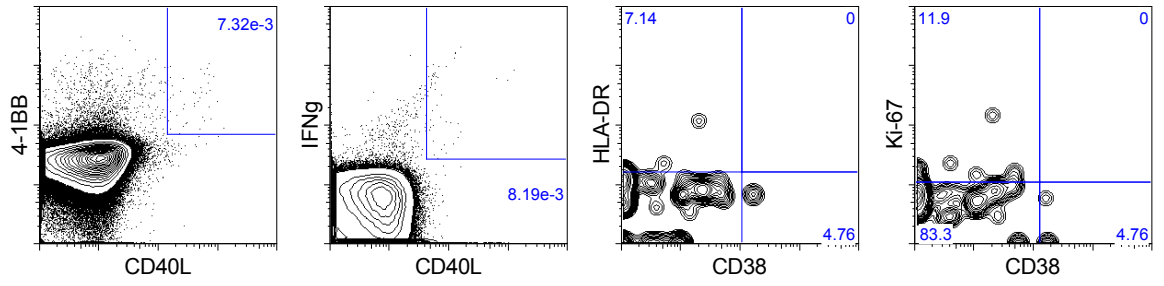

**HD42  
S-II (C-term)**

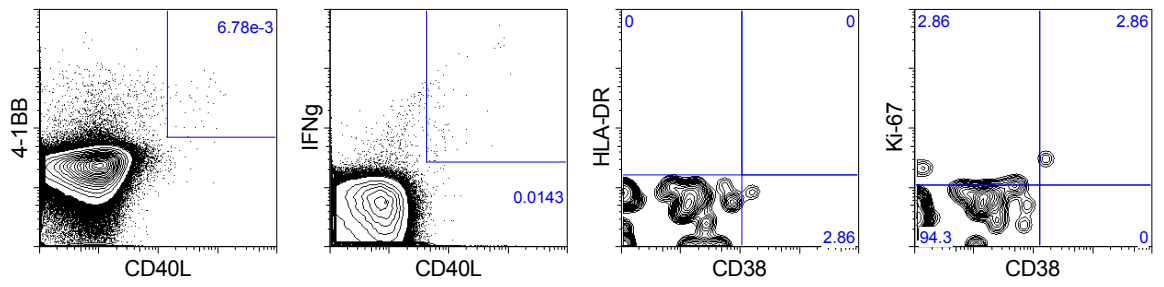

**HD42  
CMVpp65**

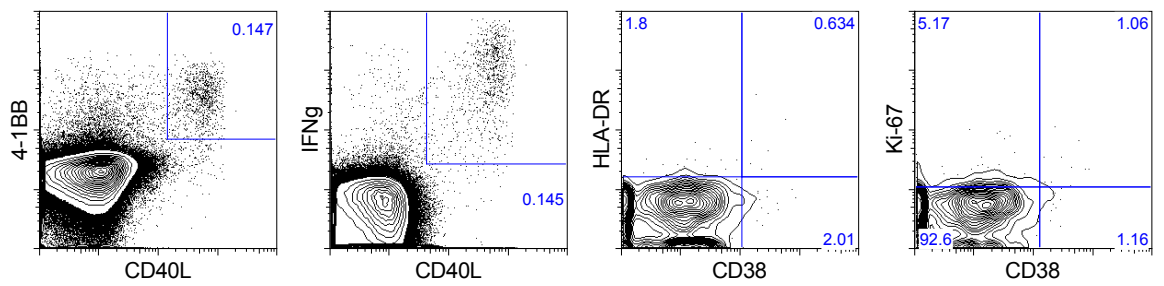

**HD42  
SEB/TSST1**

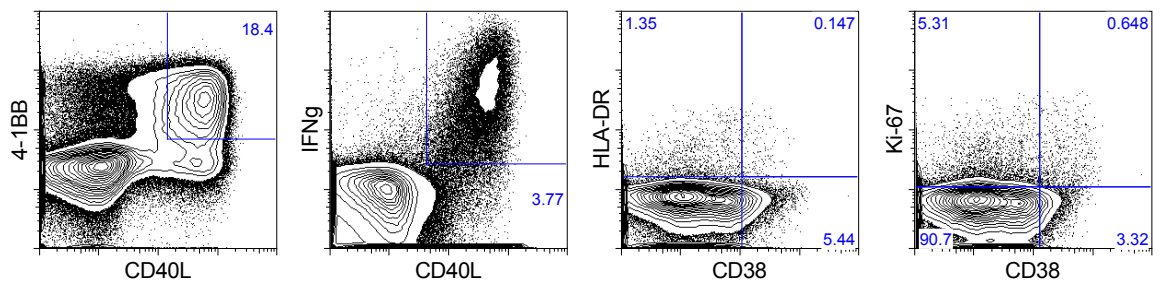



**HD46  
unstimulated**

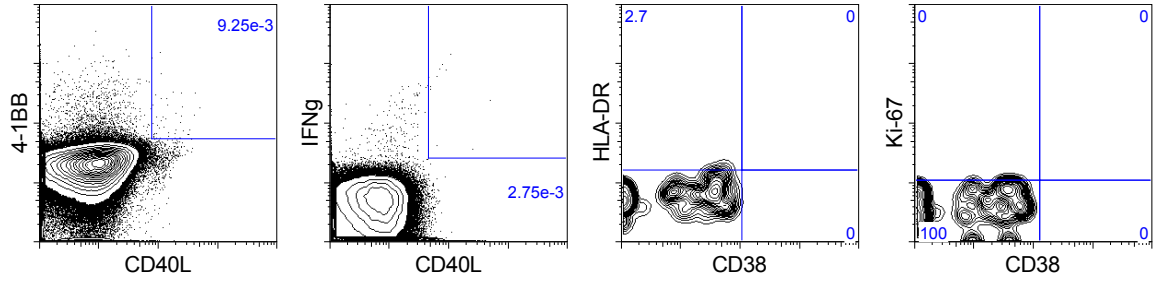

**HD46  
S-I (N-term)**

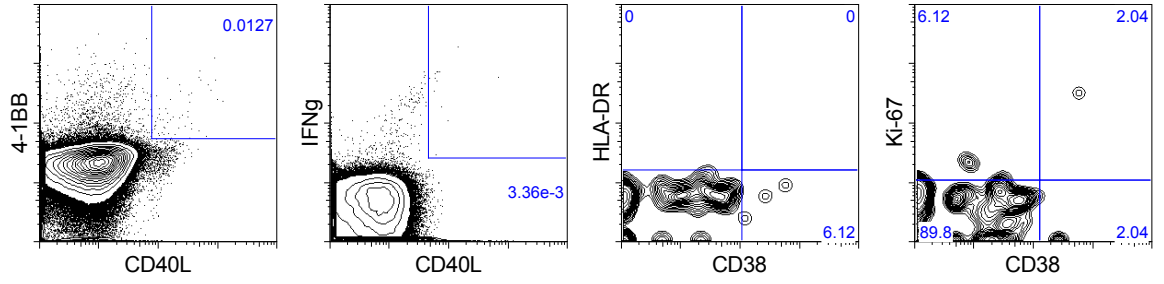

**HD46  
S-II (C-term)**

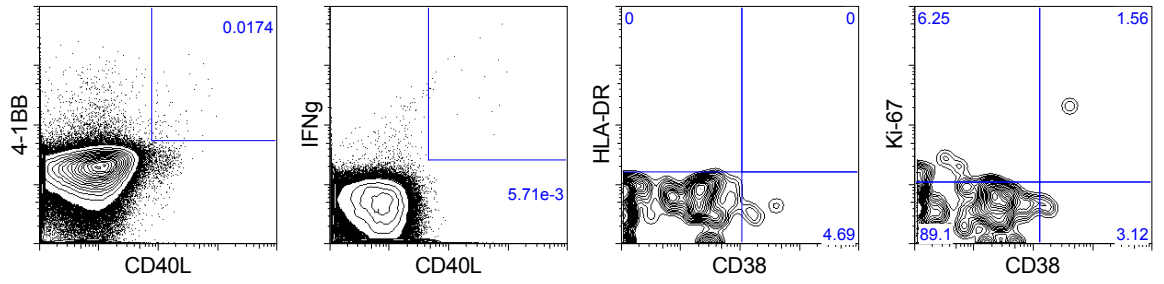

**HD46  
CMVpp65**

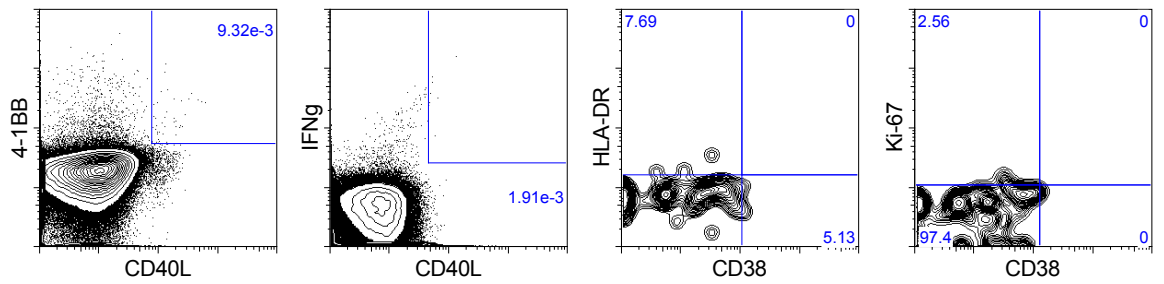

**HD46  
SEB/TSST1**

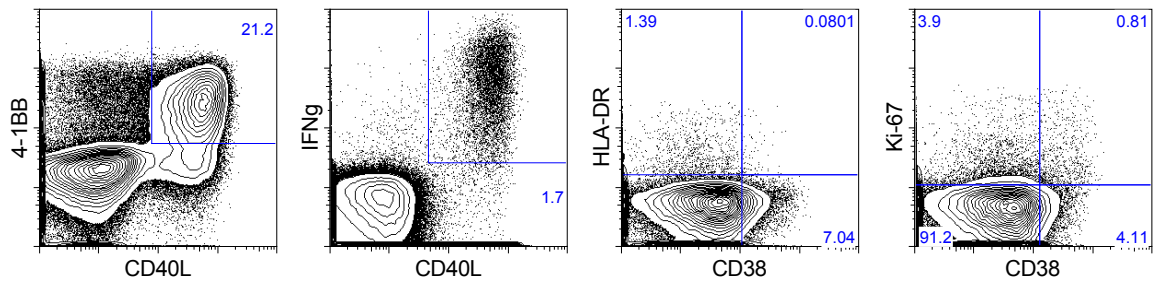



**HD47  
unstimulated**

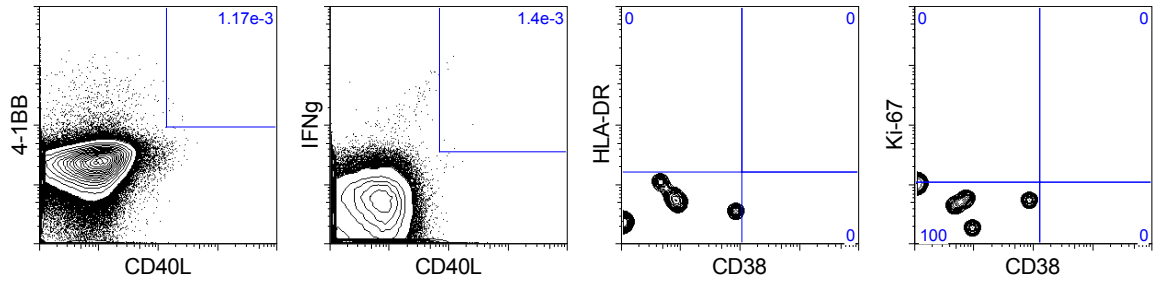

**HD47  
S-I (N-term)**

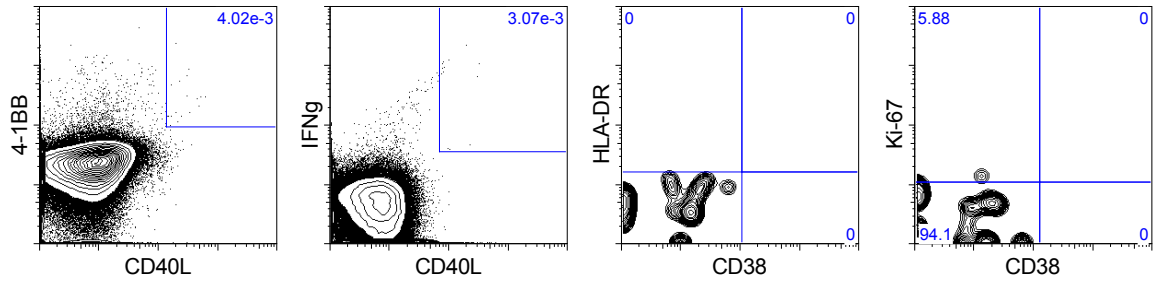

**HD47  
S-II (C-term)**

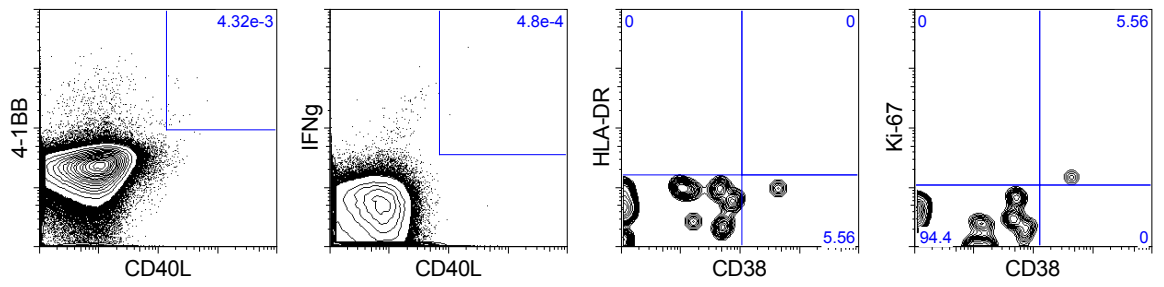

**HD47  
CMVpp65**

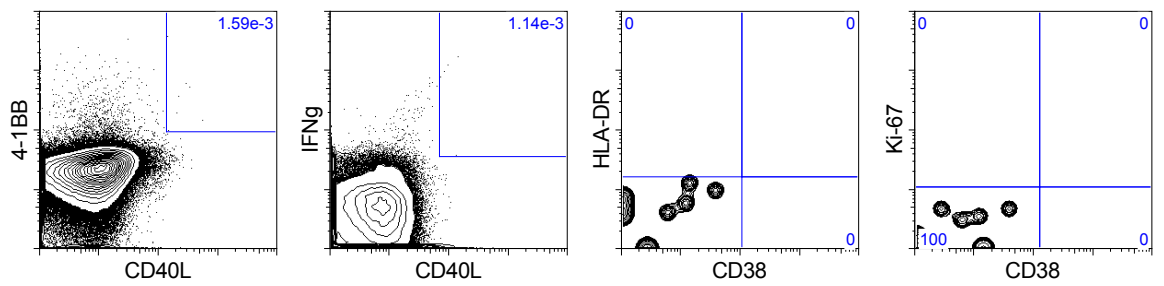

**HD47  
SEB/TSST1**

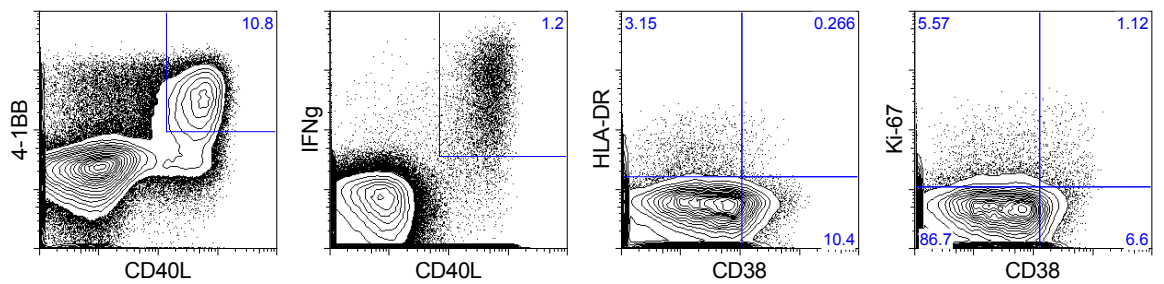

**HD48  
unstimulated**

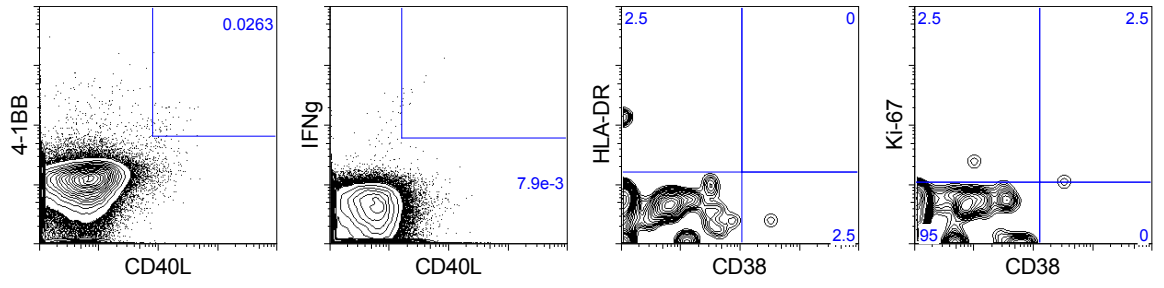

**HD48  
S-I (N-term)**

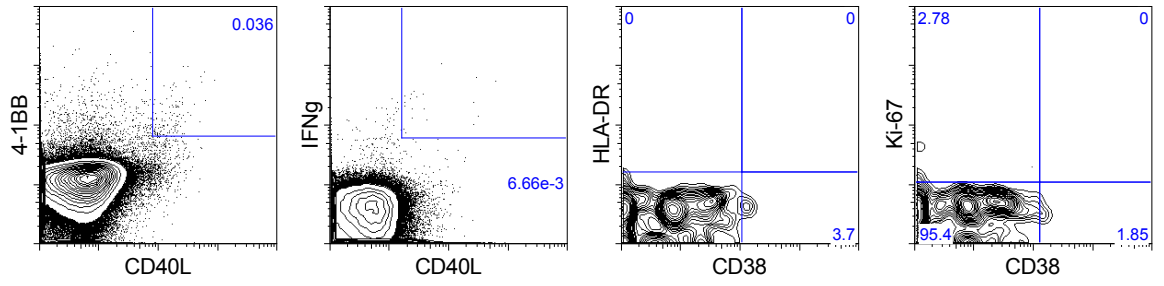

**HD48  
S-II (C-term)**

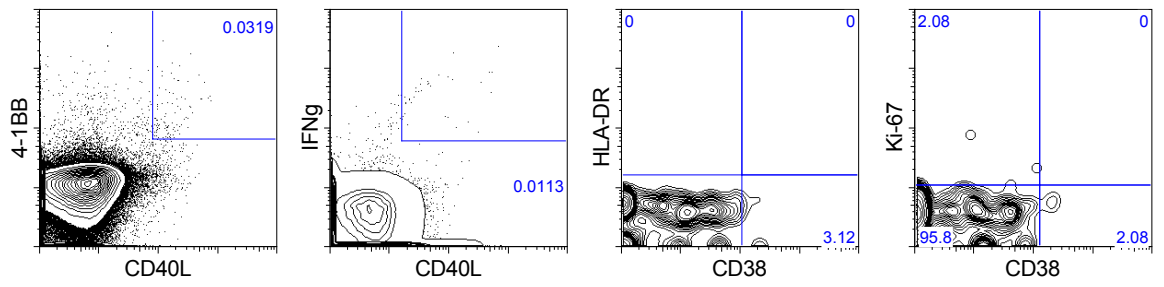

**HD48  
CMVpp65**

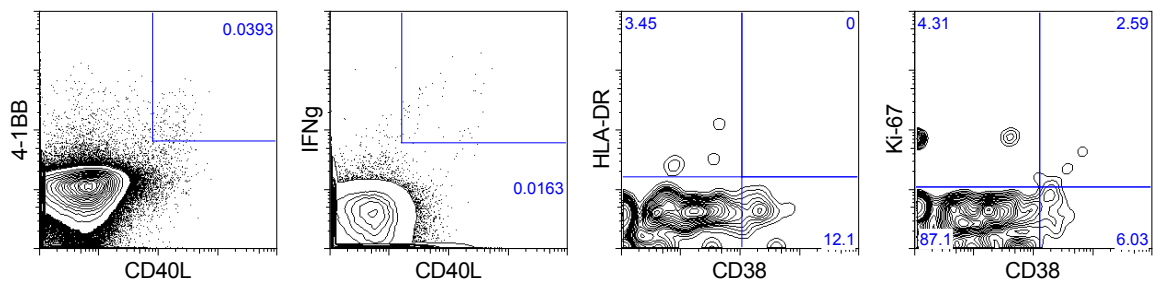

**HD48  
SEB/TSST1**

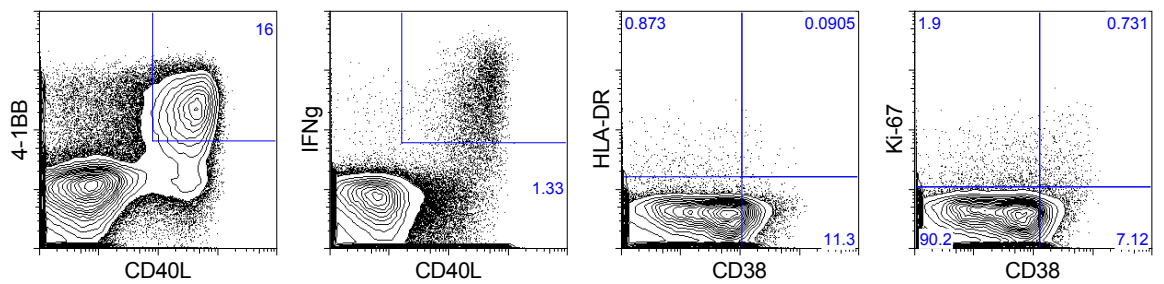

**HD49  
unstimulated**

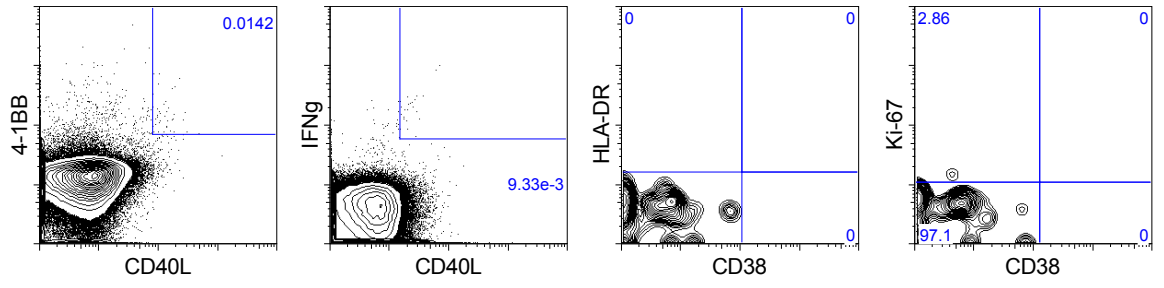

**HD49  
S-I (N-term)**

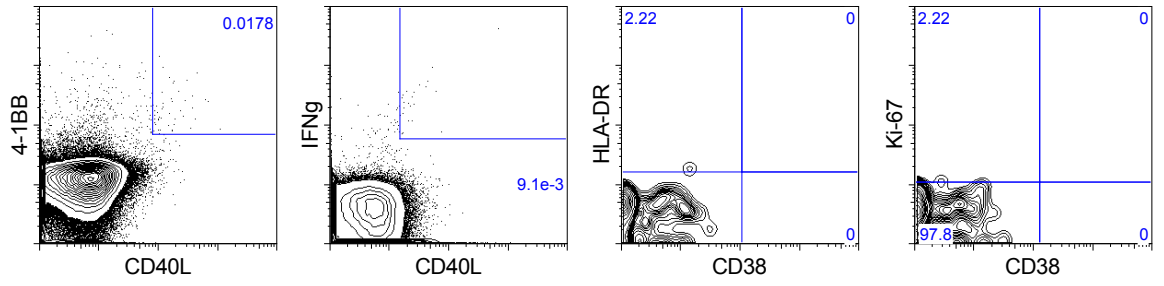

**HD49  
S-II (C-term)**

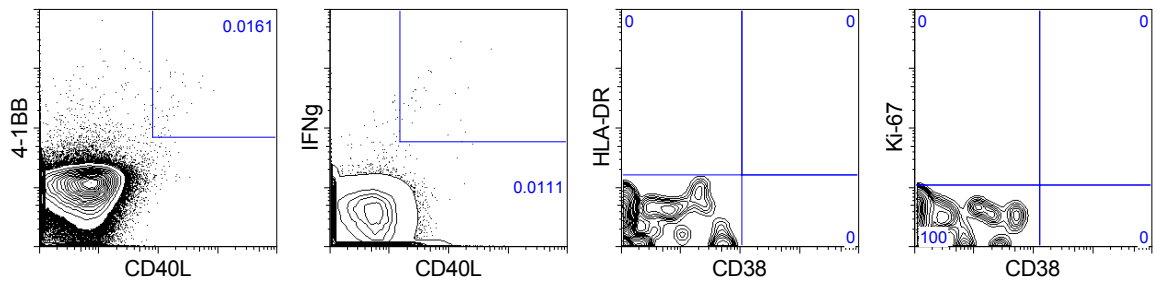

**HD49  
CMVpp65**

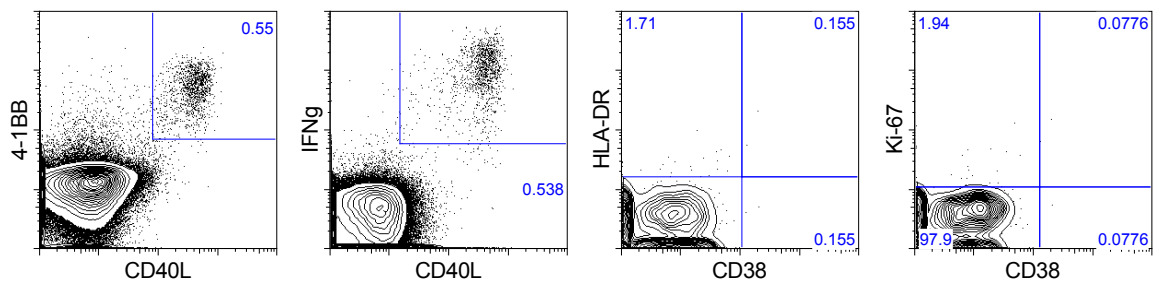

**HD49  
SEB/TSST1**

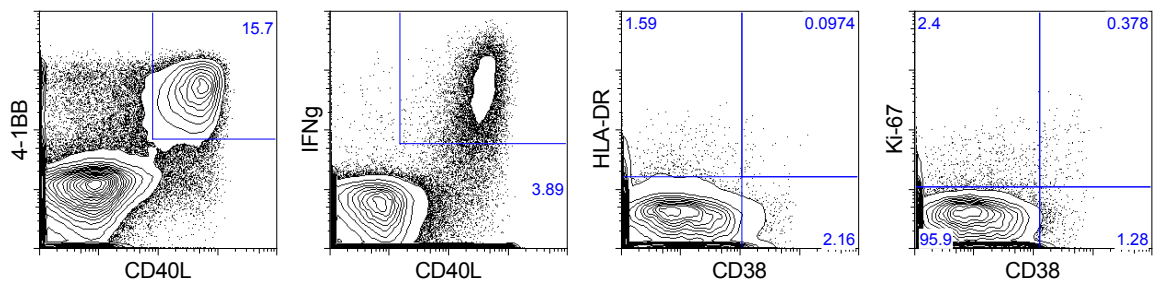

**HD50  
unstimulated**

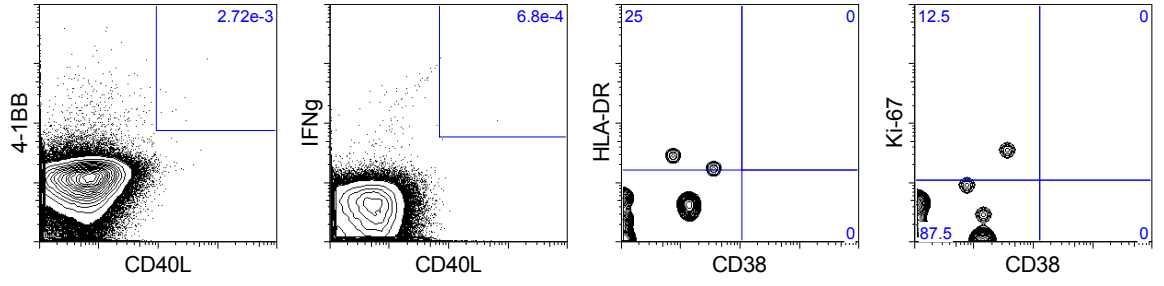

**HD50  
S-I (N-term)**

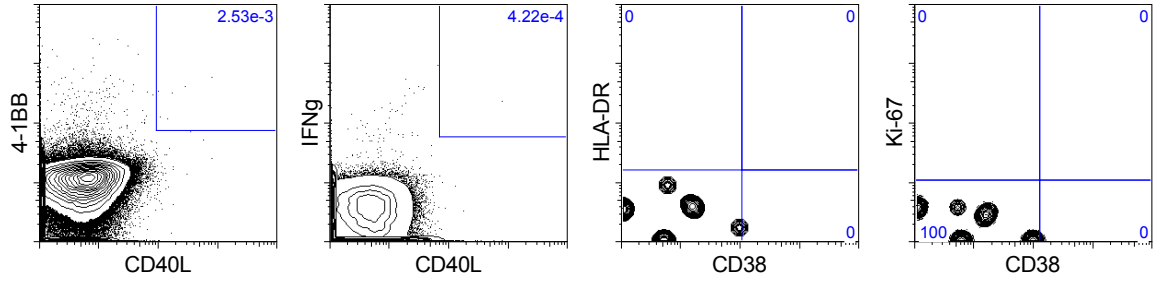

**HD50  
S-II (C-term)**

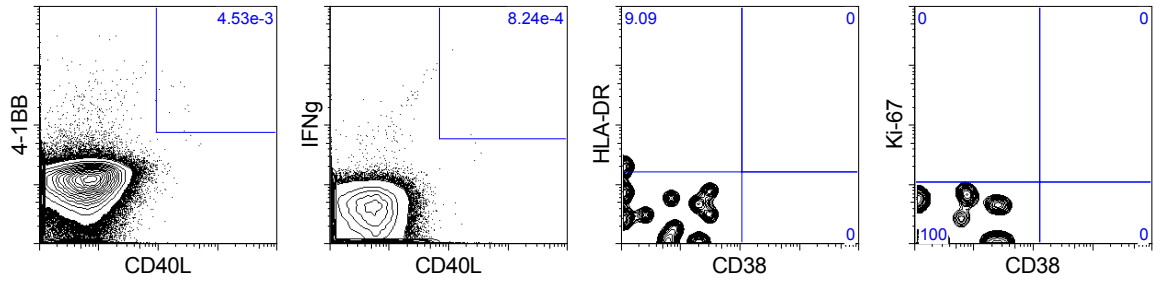

**HD50  
CMVpp65**

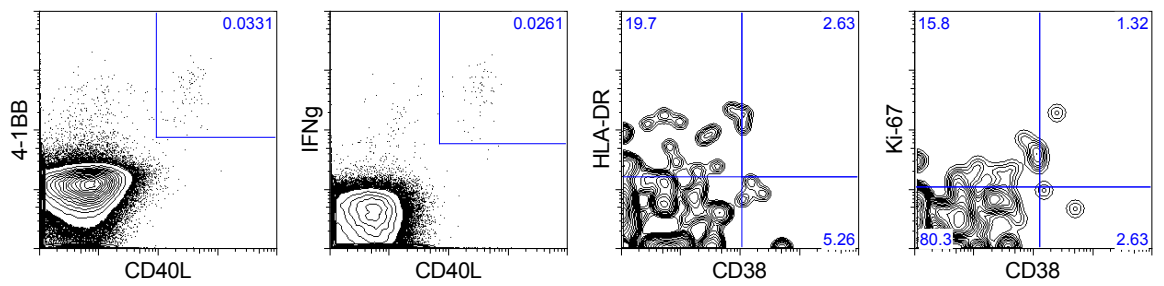

**HD50  
SEB/TSST1**

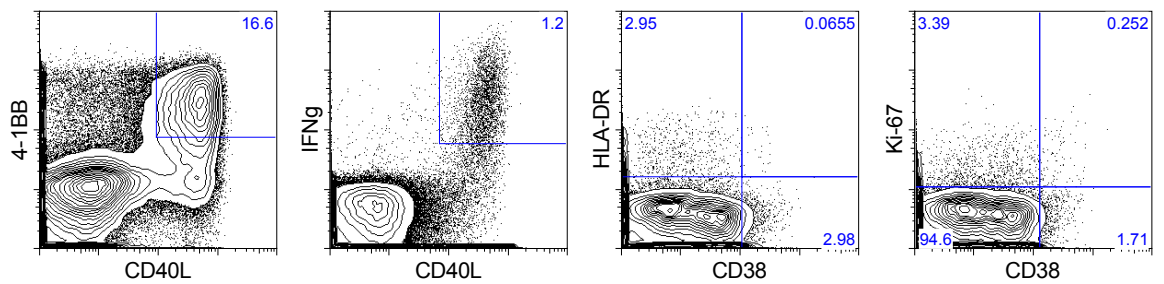

**HD51  
unstimulated**

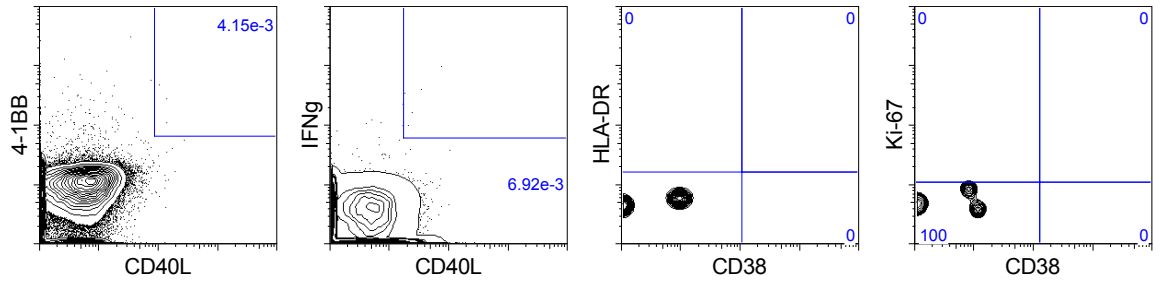

**HD51  
S-I (N-term)**

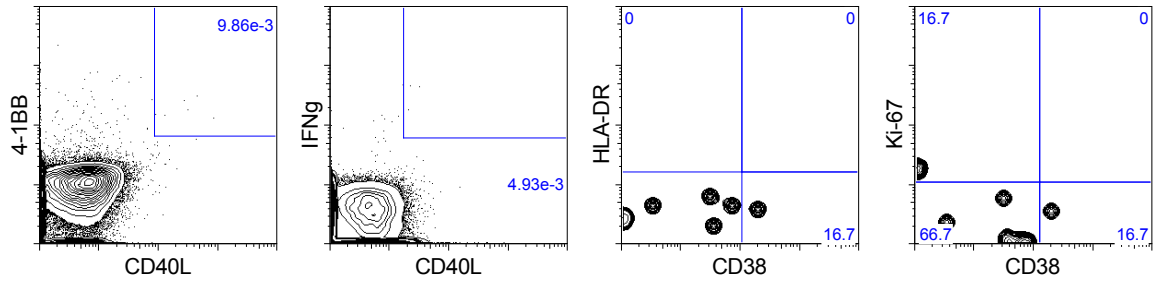

**HD51  
S-II (C-term)**

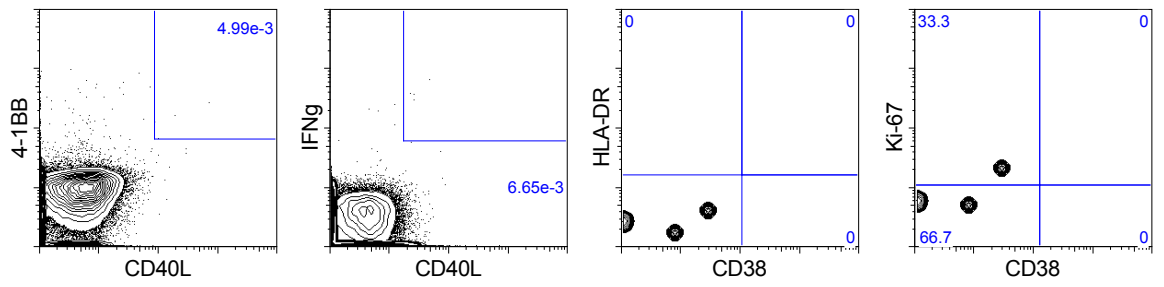

**HD51  
CMVpp65**

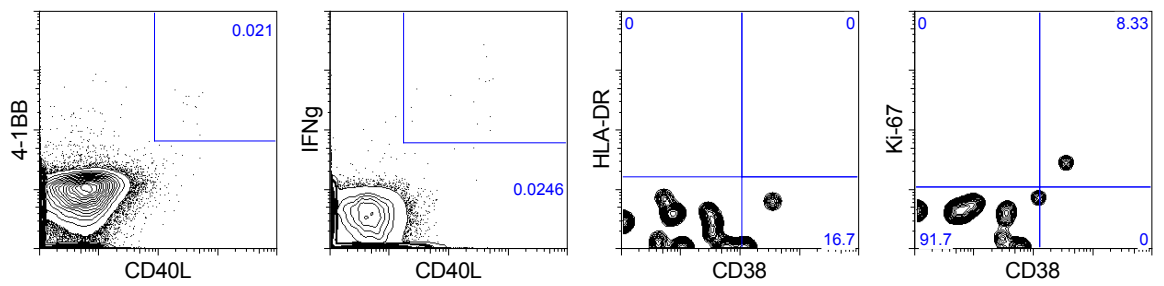

**HD51  
SEB/TSST1**

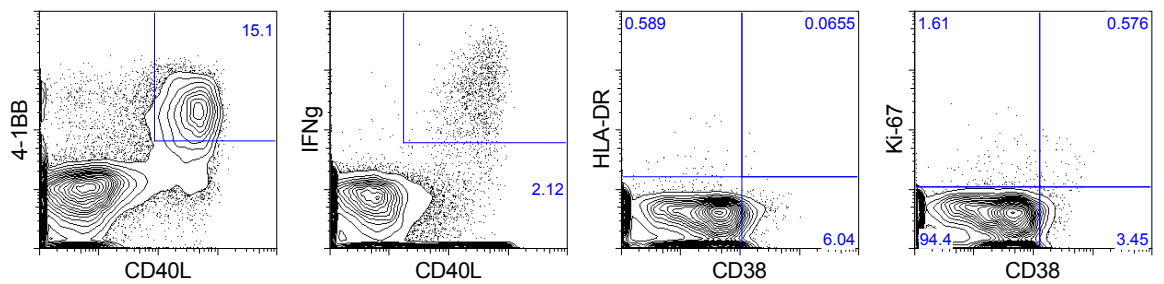

**HD52  
unstimulated**

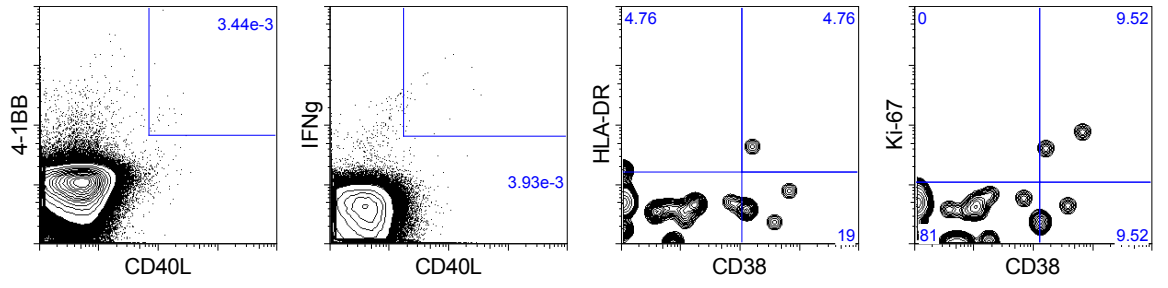

**HD52  
S-I (N-term)**

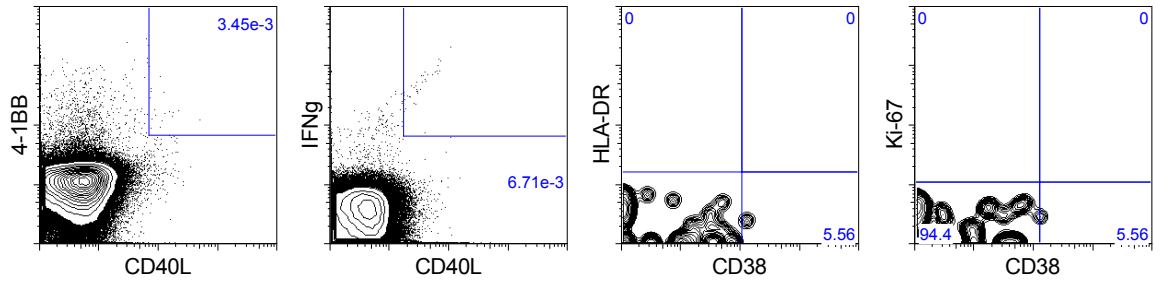

**HD52  
S-II (C-term)**

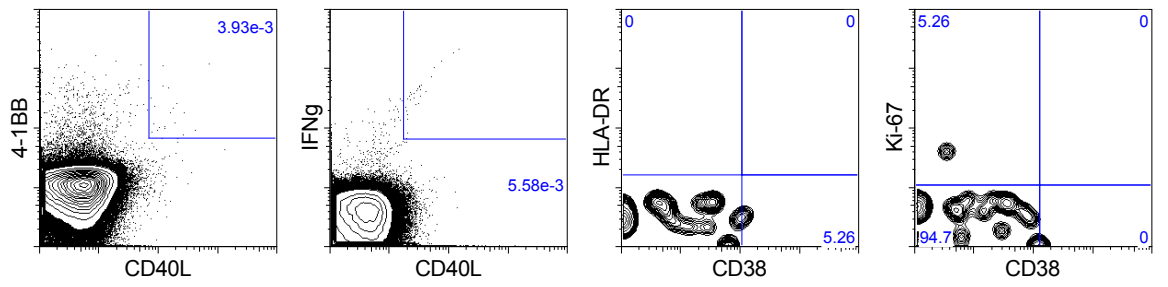

**HD52  
CMVpp65**

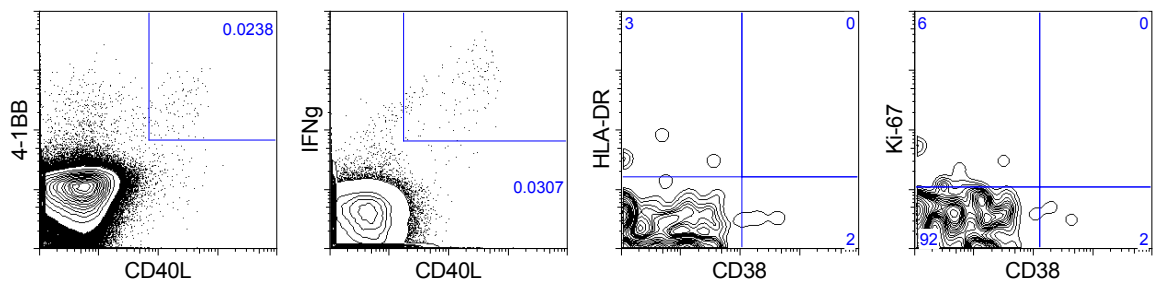

**HD52  
SEB/TSST1**

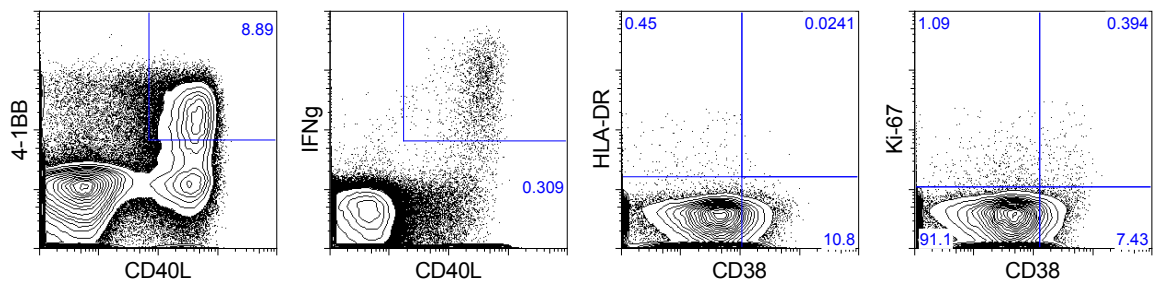

**HD53  
unstimulated**

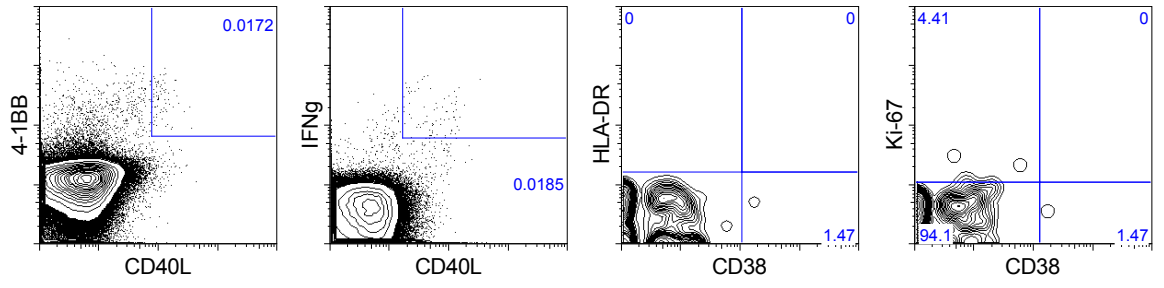

**HD53  
S-I (N-term)**

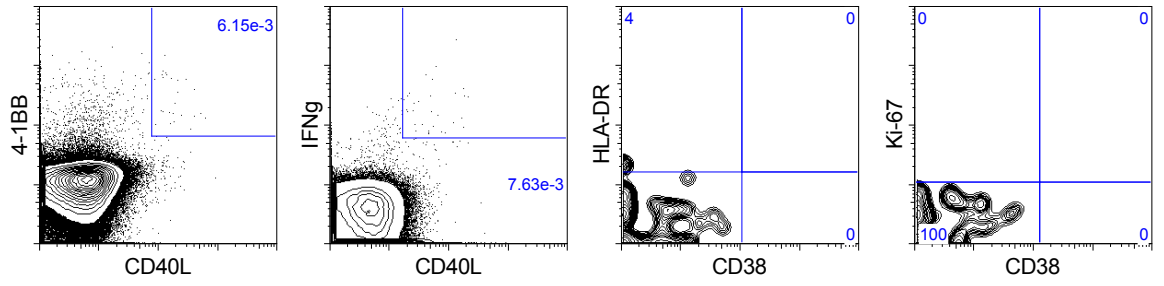

**HD53  
S-II (C-term)**

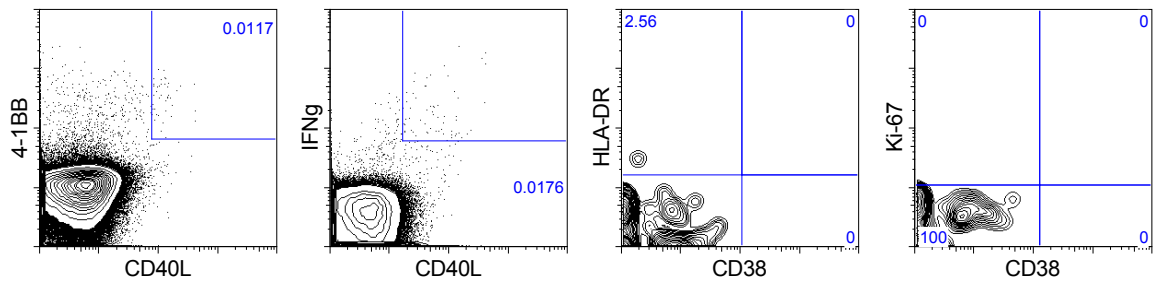

**HD53  
CMVpp65**

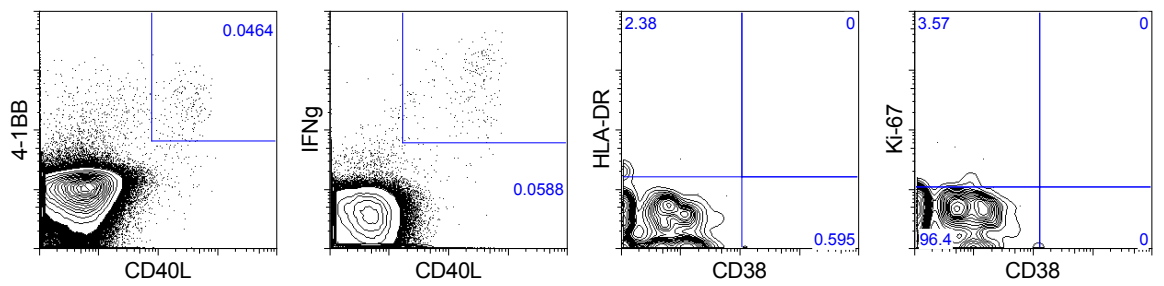

**HD53  
SEB/TSST1**

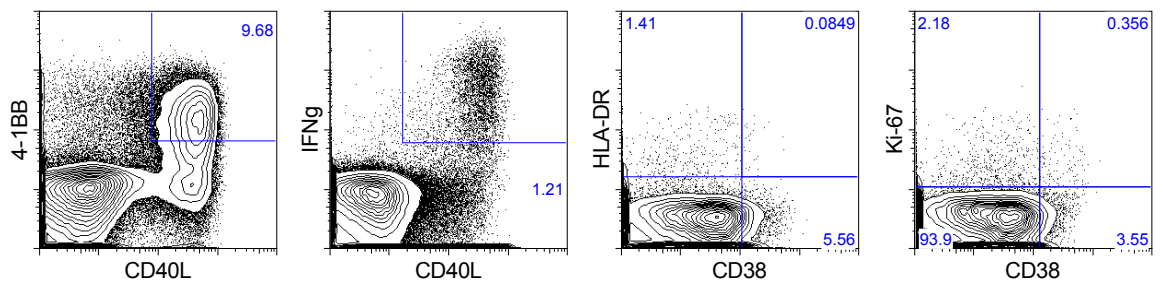



**HD55  
unstimulated**

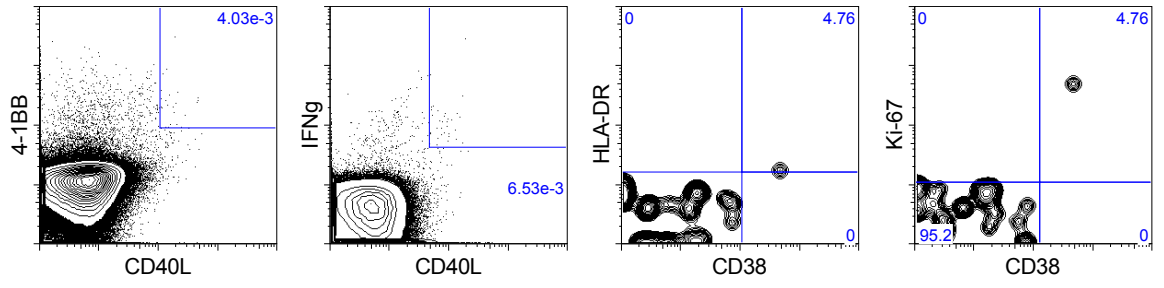

**HD55  
S-I (N-term)**

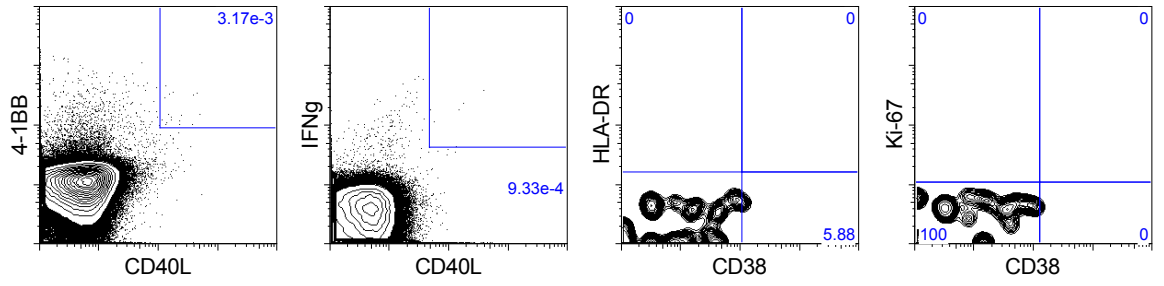

**HD55  
S-II (C-term)**

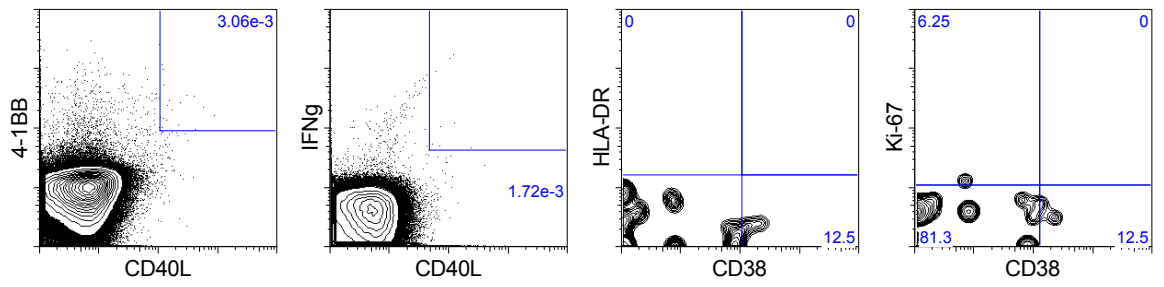

**HD55  
CMVpp65**

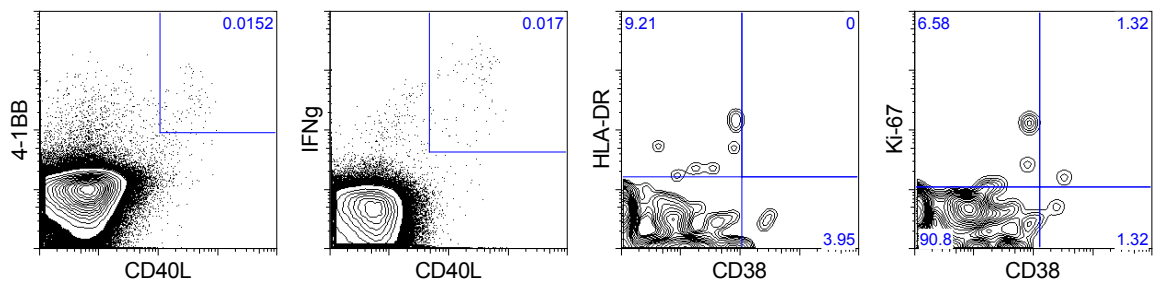

**HD55  
SEB/TSST1**

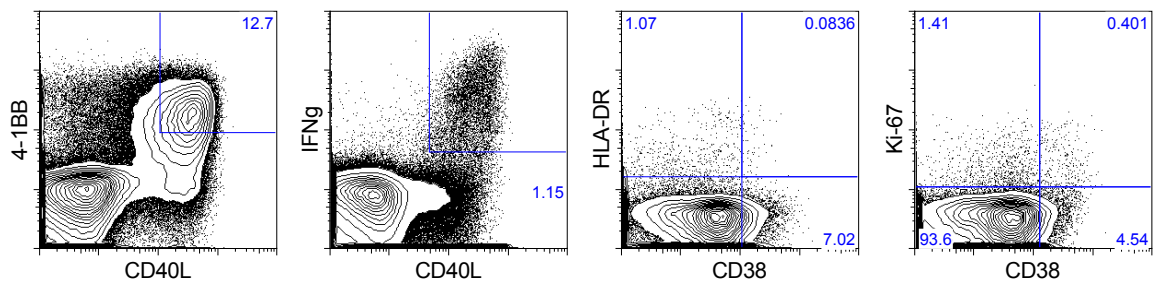

**HD56  
unstimulated**

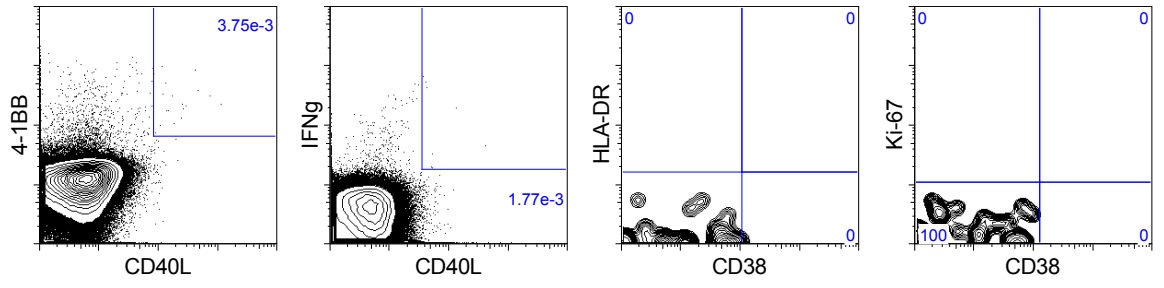

**HD56  
S-I (N-term)**

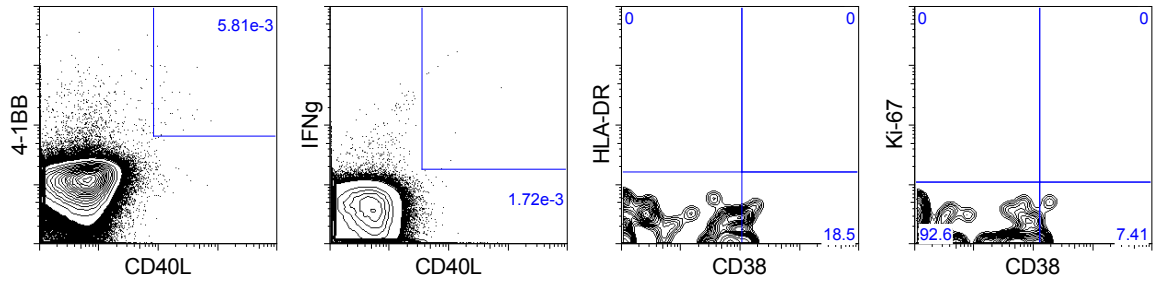

**HD56  
S-II (C-term)**

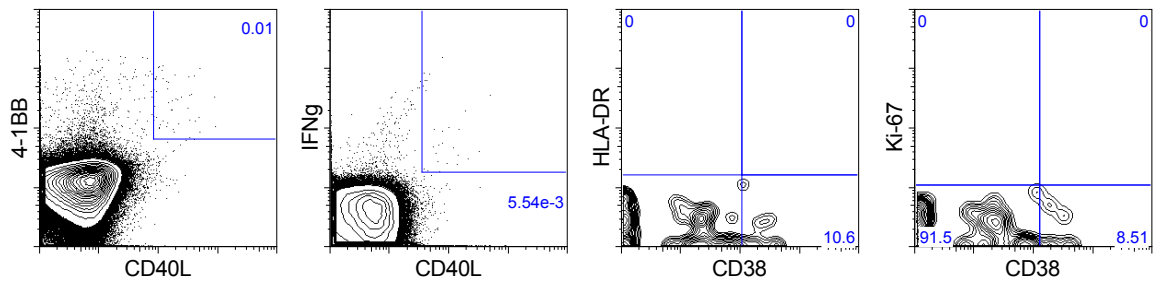

**HD56  
CMVpp65**

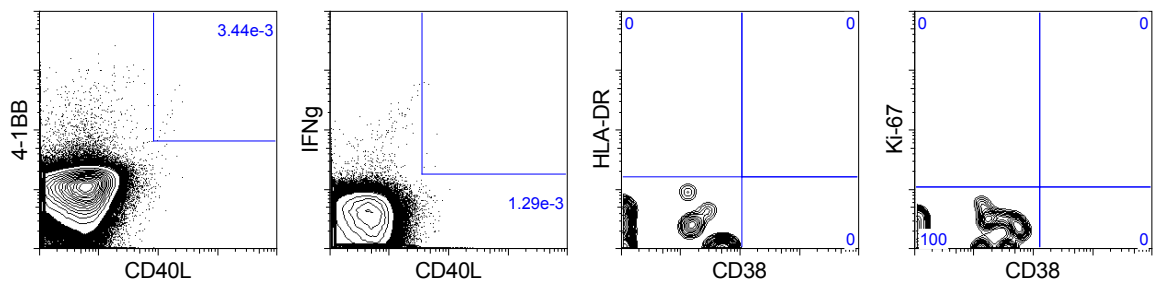

**HD56  
SEB/TSST1**

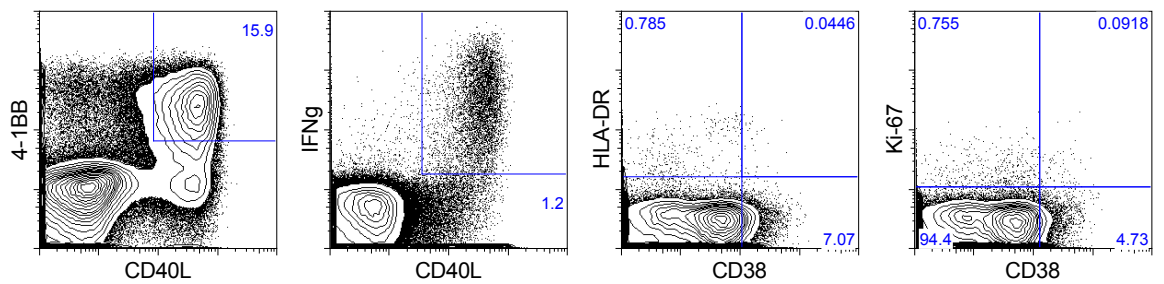

**HD57  
unstimulated**

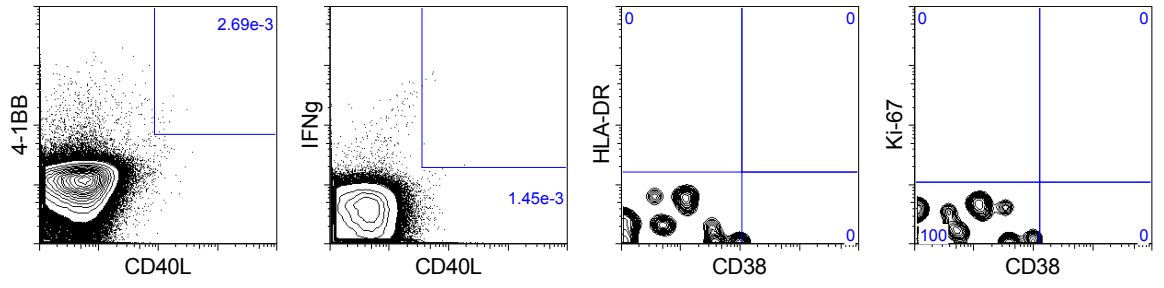

**HD57  
S-I (N-term)**

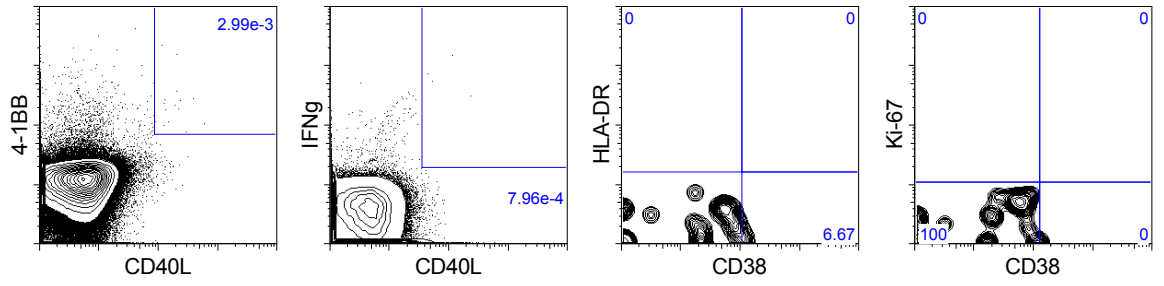

**HD57  
S-II (C-term)**

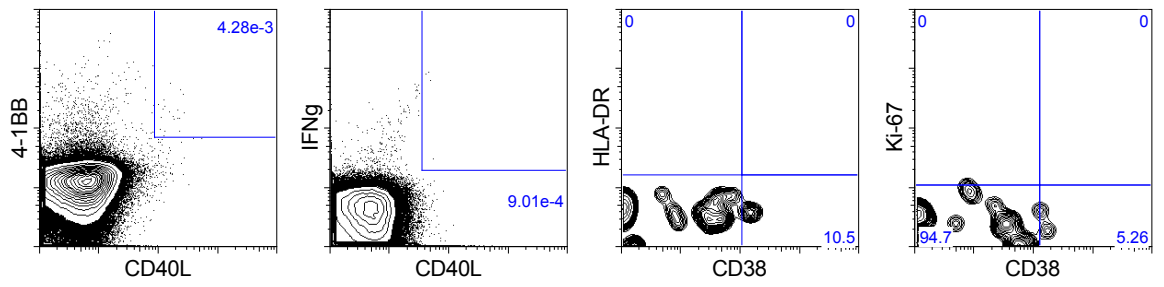

**HD57  
CMVpp65**

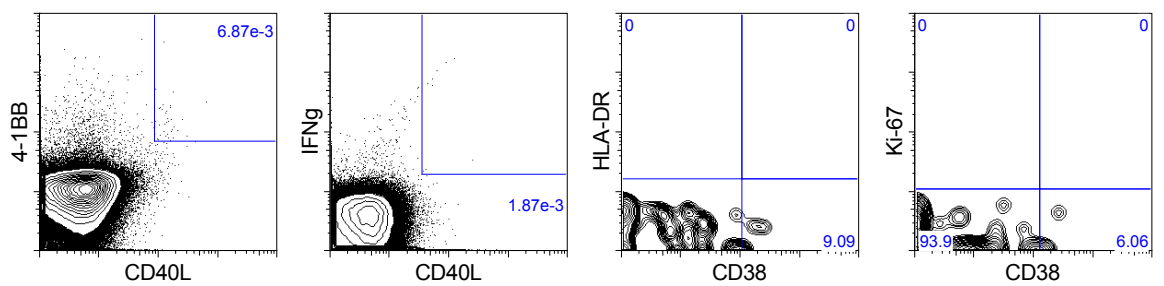

**HD57  
SEB/TSST1**

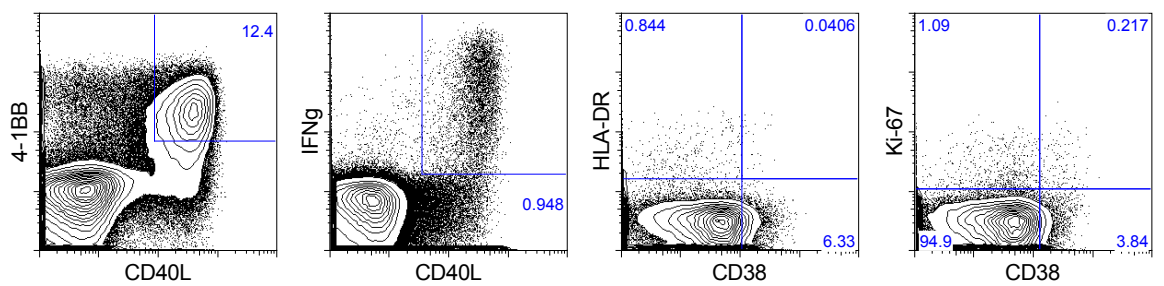

**HD58  
unstimulated**

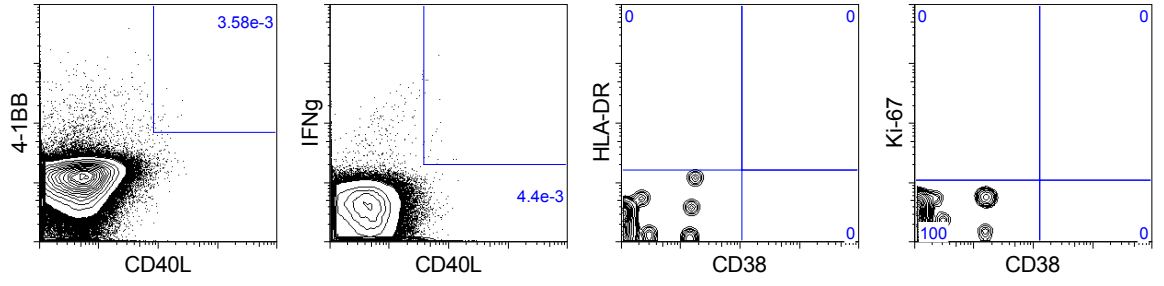

**HD58  
S-I (N-term)**

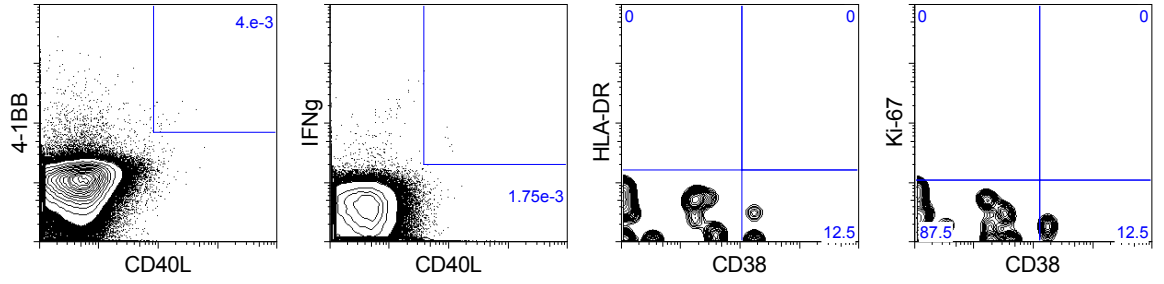

**HD58  
S-II (C-term)**

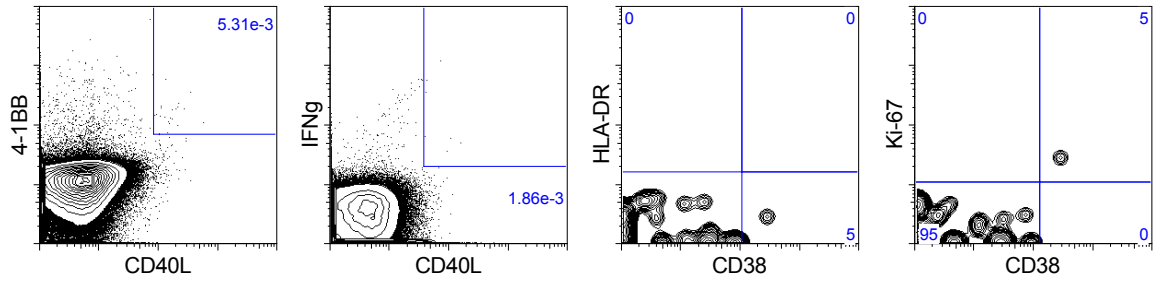

**HD58  
CMVpp65**

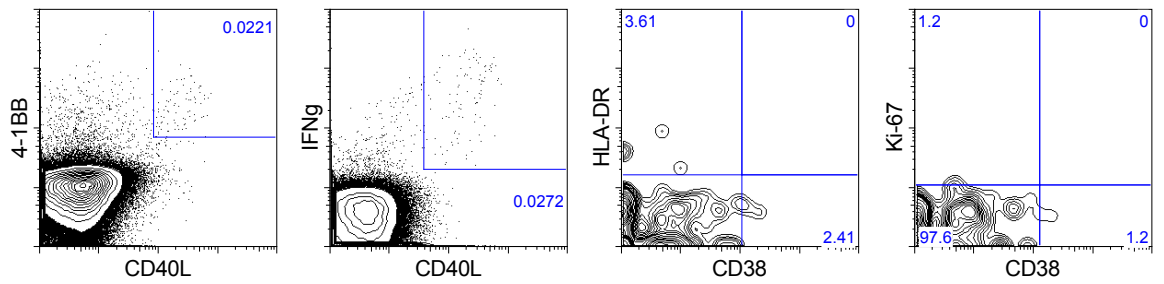

**HD58  
SEB/TSST1**

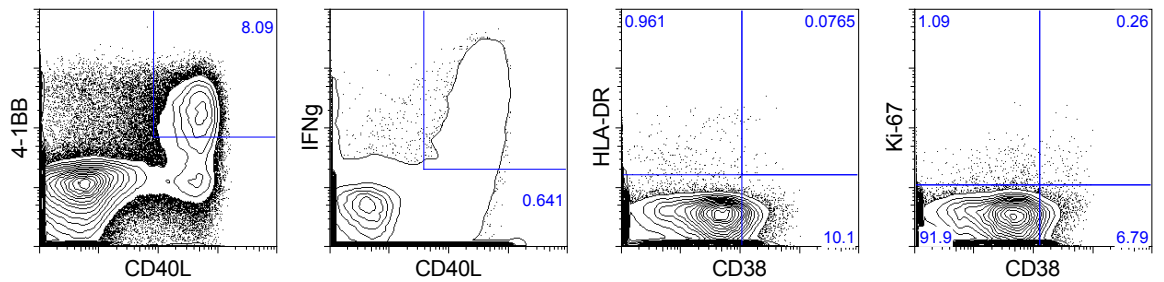

**HD59  
unstimulated**

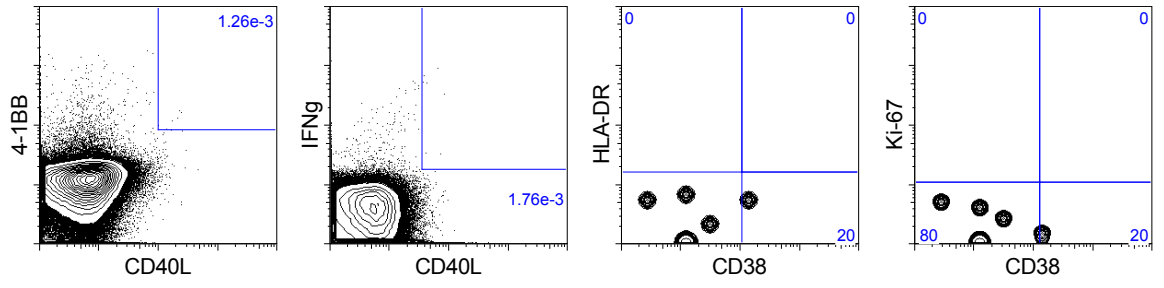

**HD59  
S-I (N-term)**

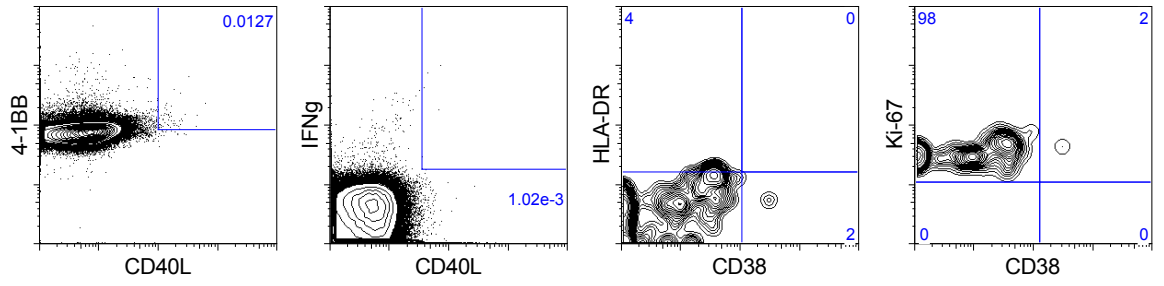

**HD59  
S-II (C-term)**

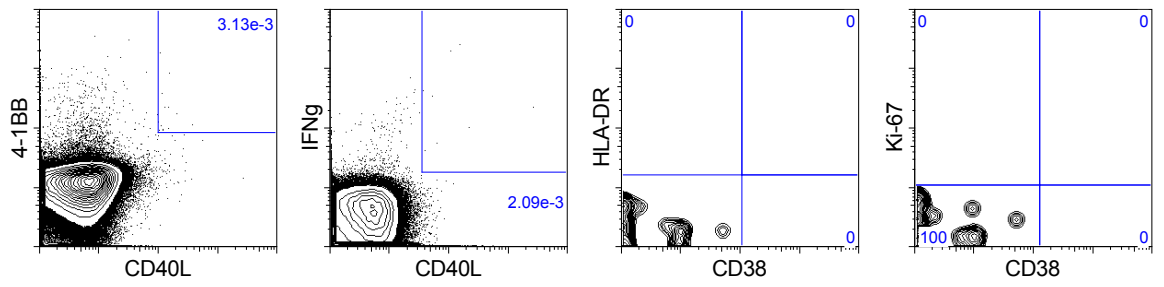

**HD59  
CMVpp65**

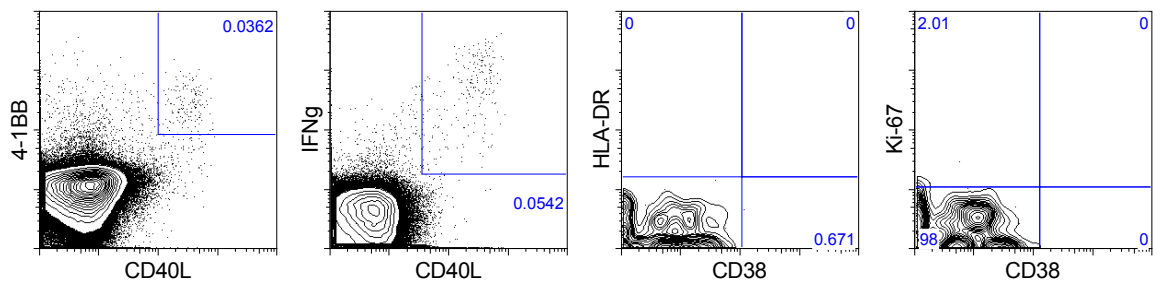

**HD59  
SEB/TSST1**

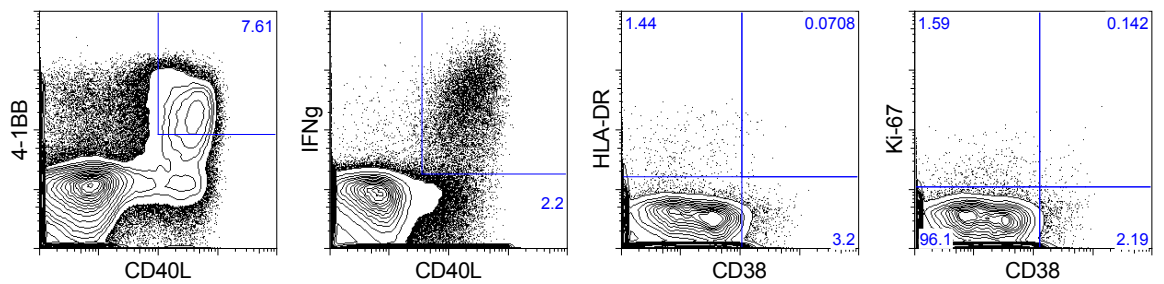

**HD61  
unstimulated**

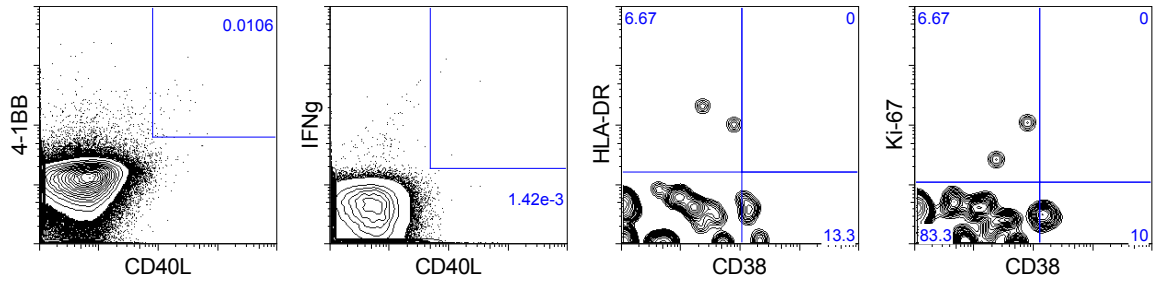

**HD61  
S-I (N-term)**

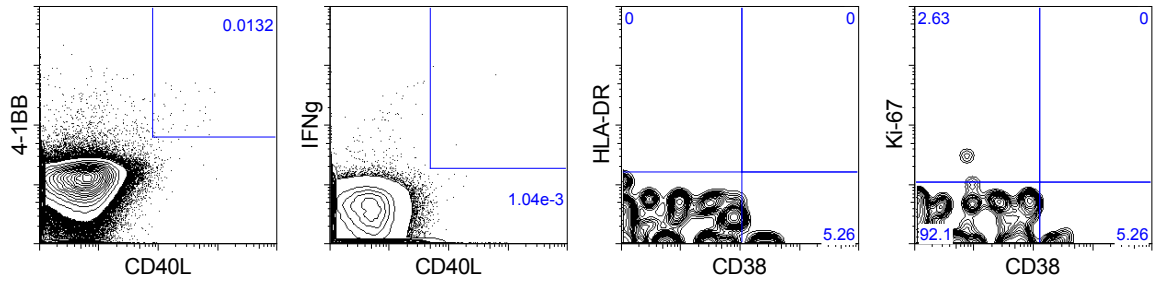

**HD61  
S-II (C-term)**

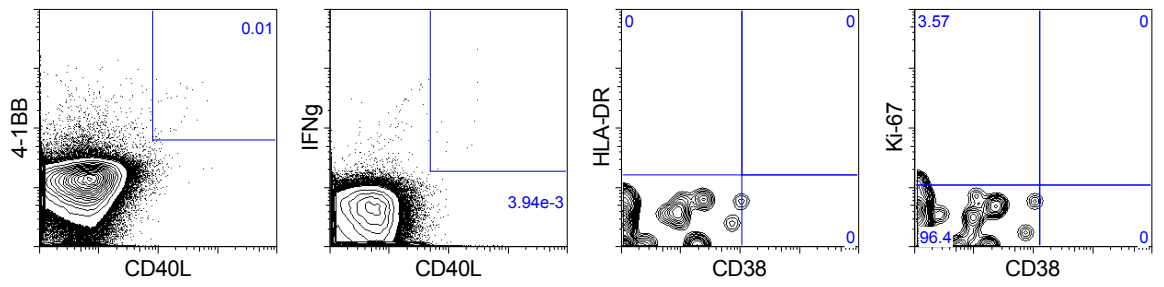

**HD61  
CMVpp65**

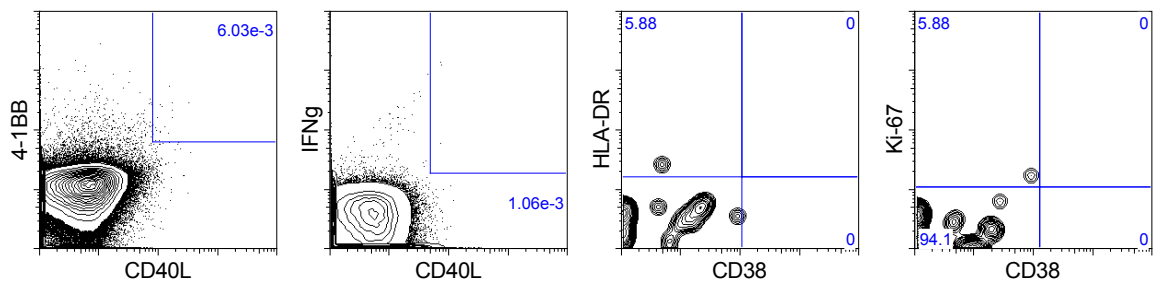

**HD61  
SEB/TSST1**

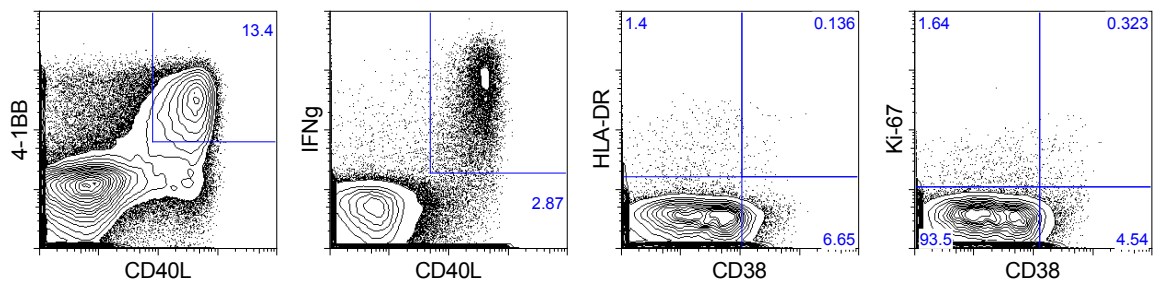

**HD62  
unstimulated**

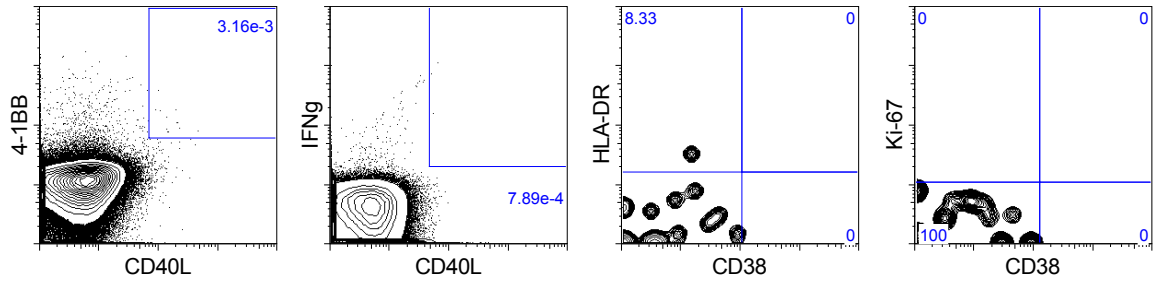

**HD62  
S-I (N-term)**

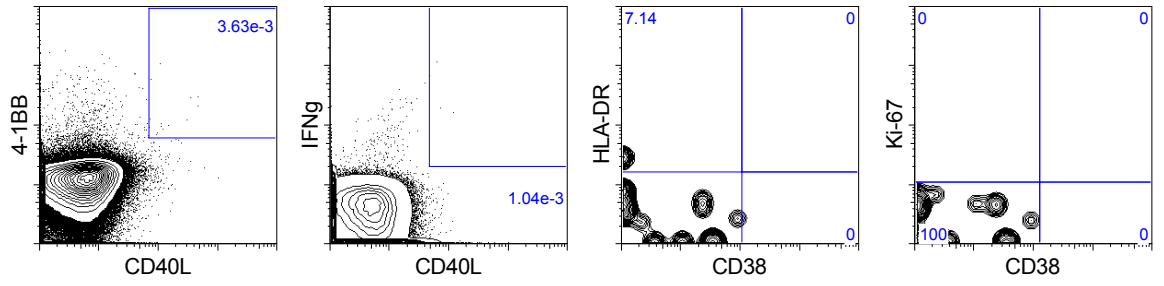

**HD62  
S-II (C-term)**

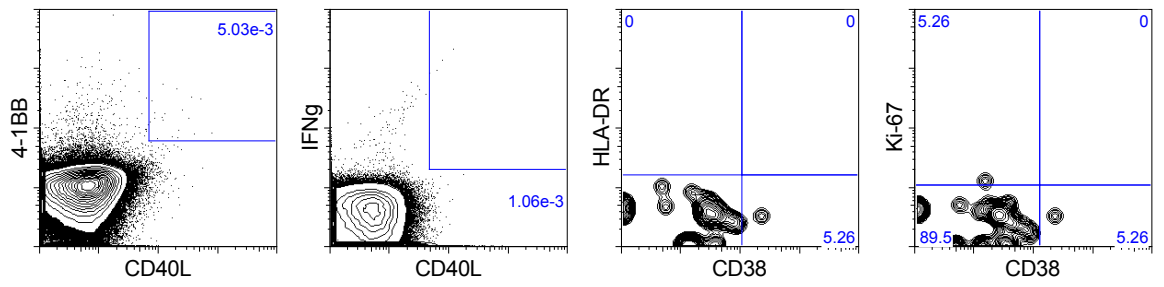

**HD62  
CMVpp65**

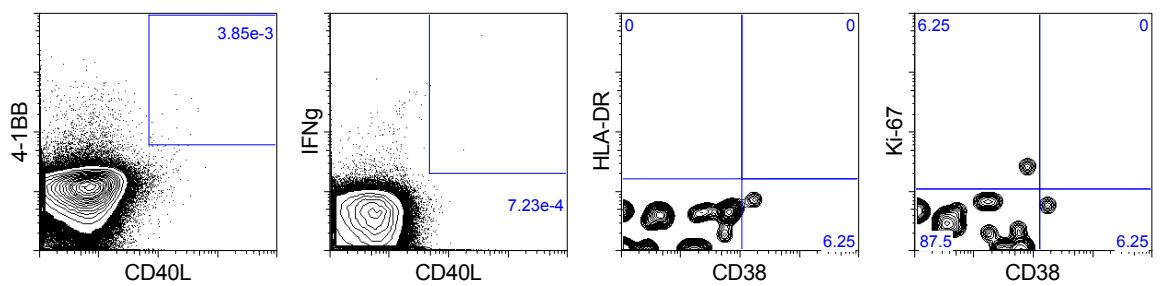

**HD62  
SEB/TSST1**

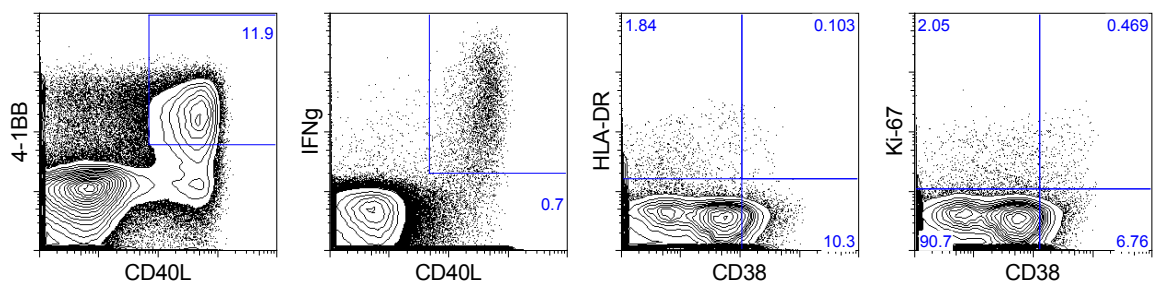



**HD63  
unstimulated**

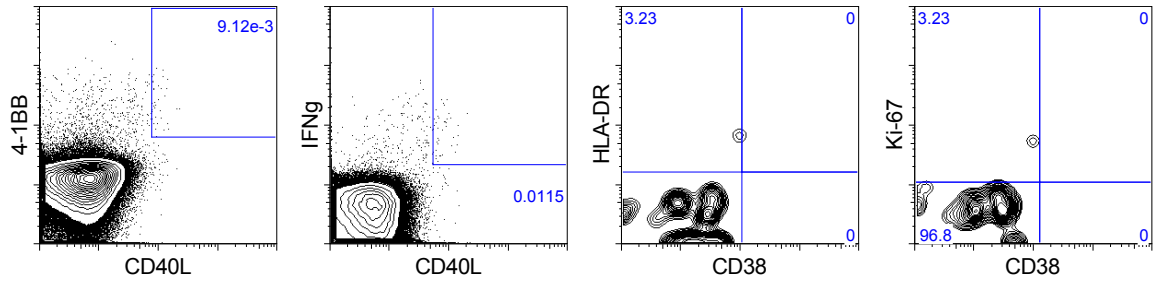

**HD63  
S-I (N-term)**

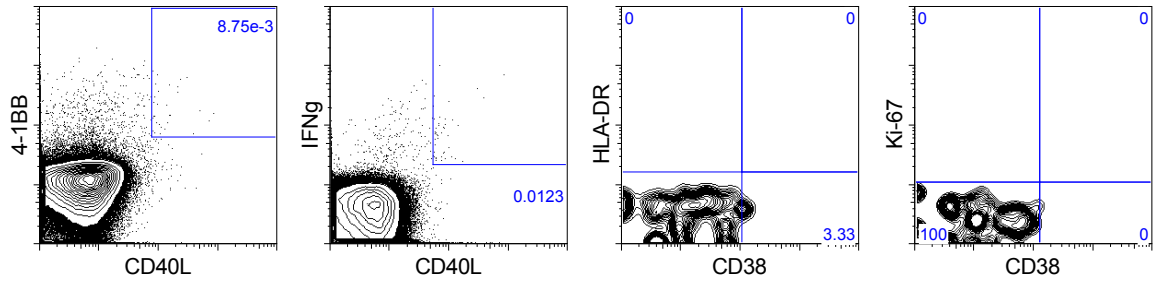

**HD63  
S-II (C-term)**

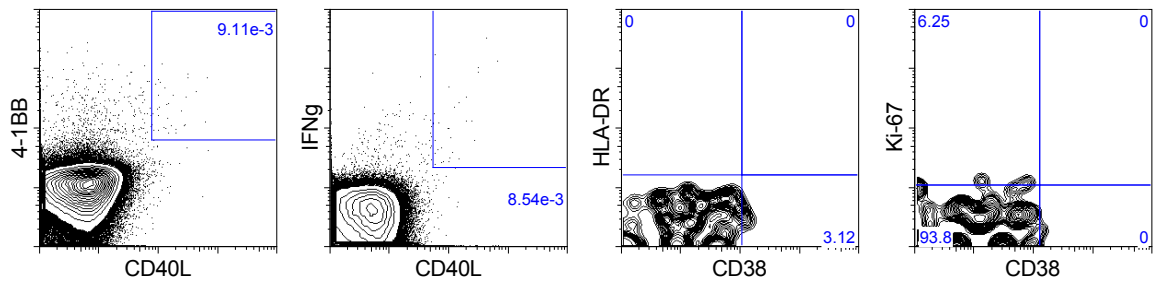

**HD63  
CMVpp65**

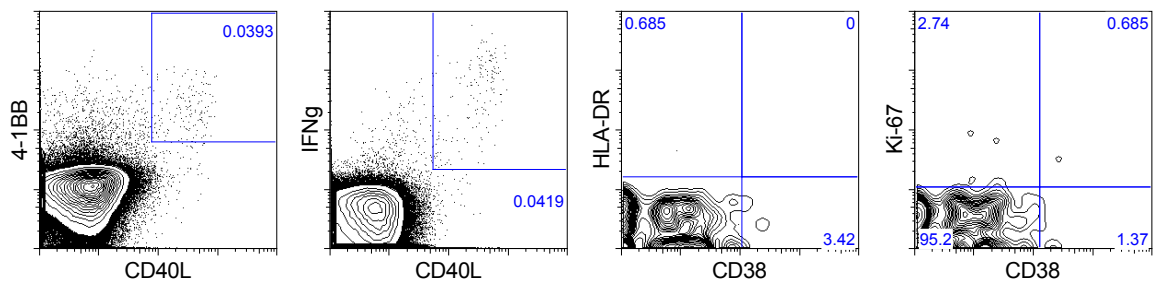

**HD63  
SEB/TSST1**

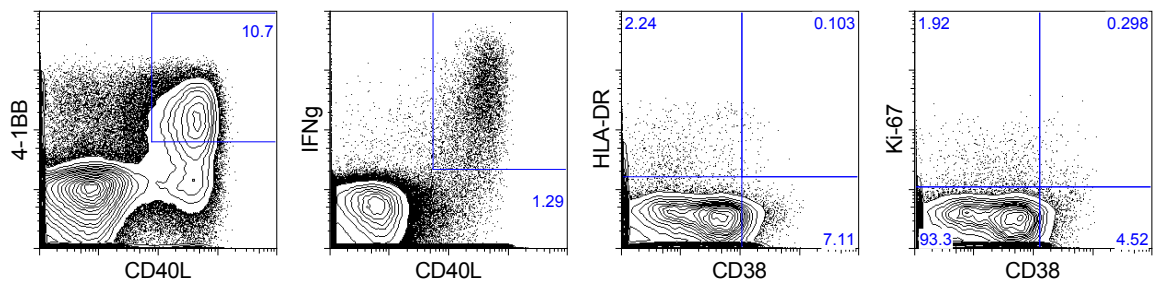

**HD64  
unstimulated**

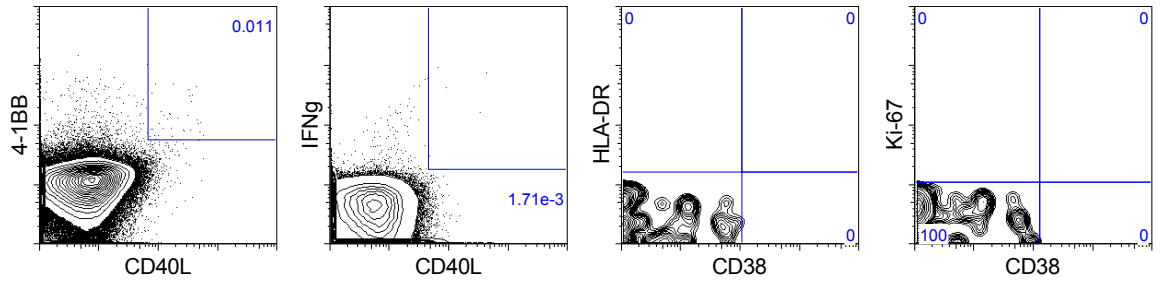

**HD64  
S-I (N-term)**

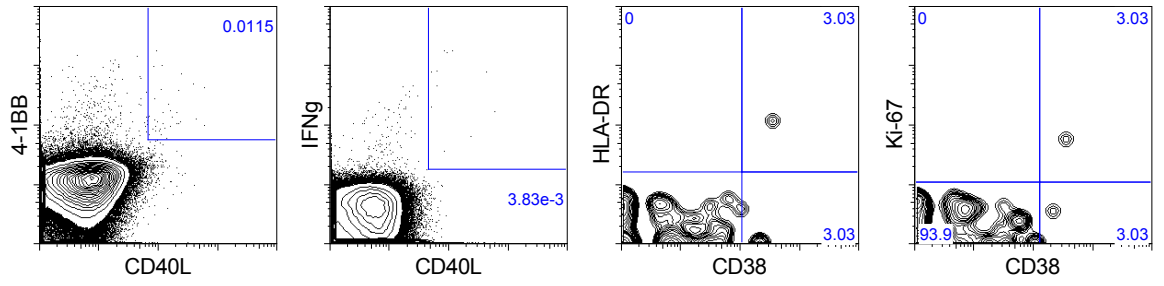

**HD64  
S-II (C-term)**

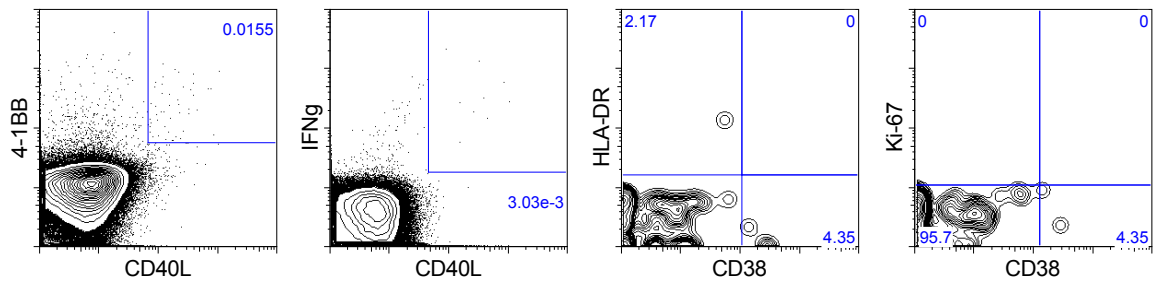

**HD64  
CMVpp65**

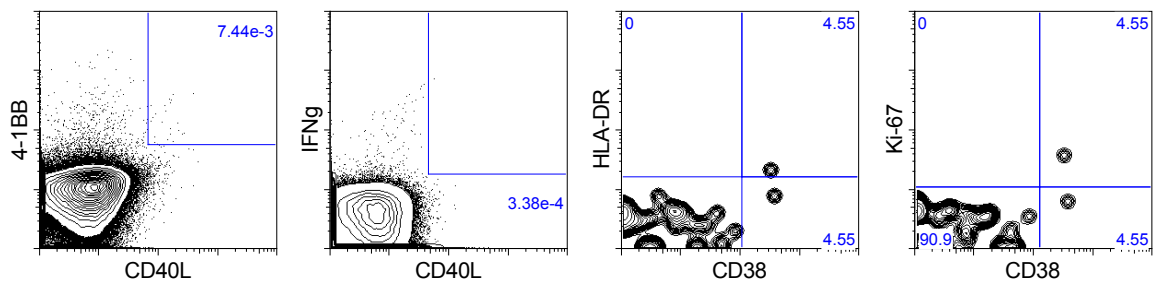

**HD64  
SEB/TSST1**

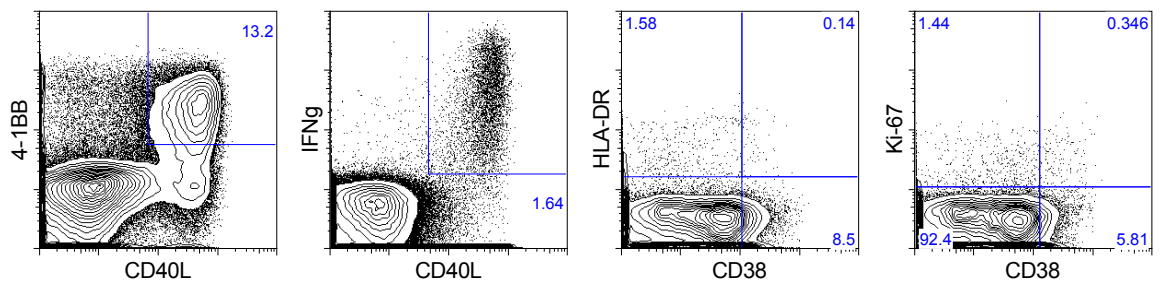

**HD65  
unstimulated**

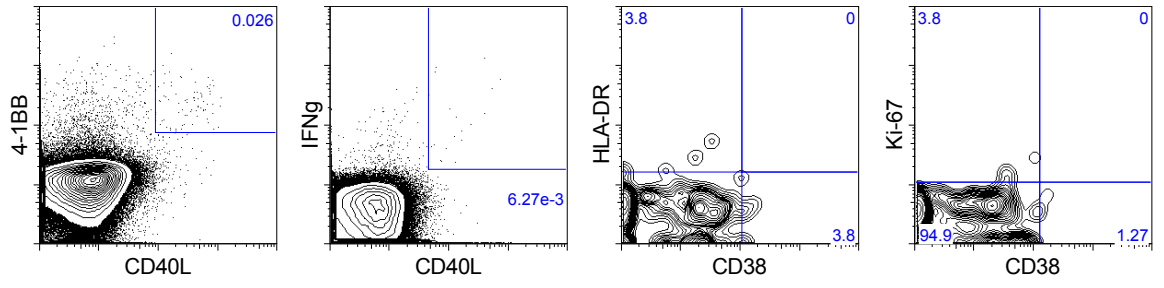

**HD65  
S-I (N-term)**

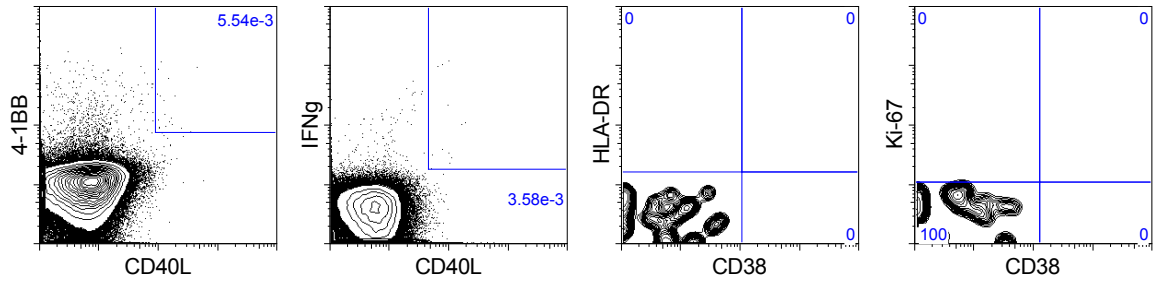

**HD65  
S-II (C-term)**

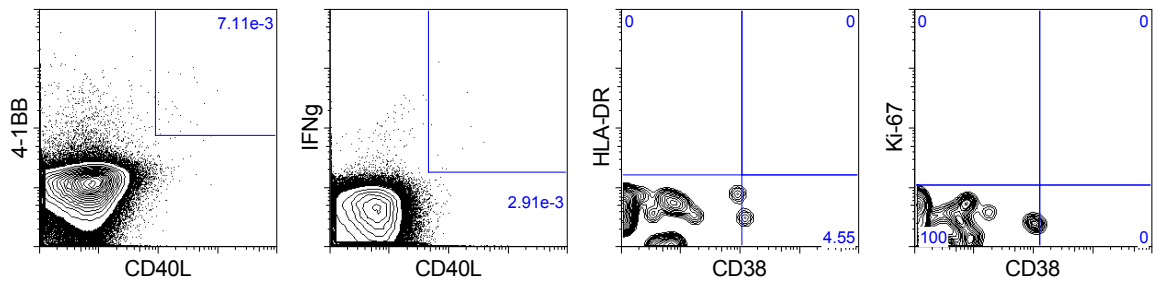

**HD65  
CMVpp65**

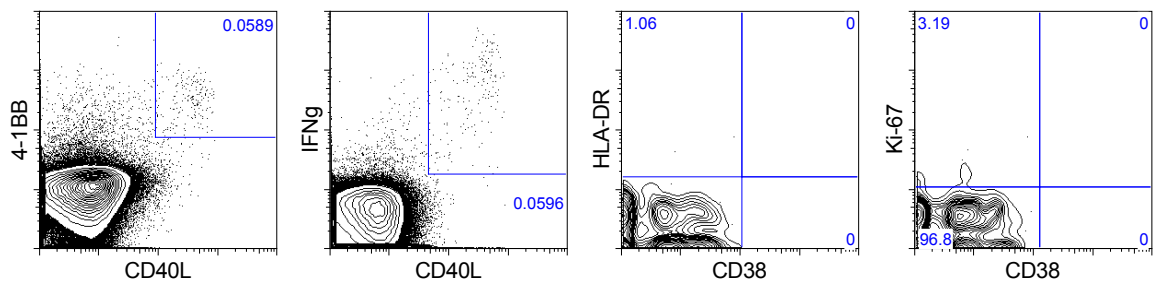

**HD65  
SEB/TSST1**

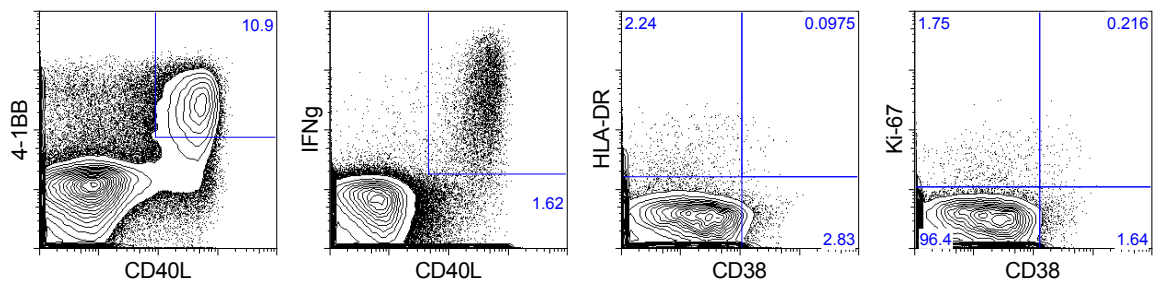

**HD66  
unstimulated**

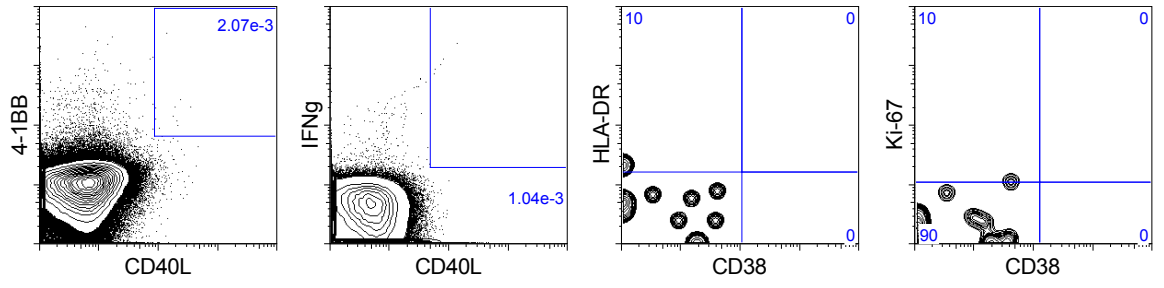

**HD66  
S-I (N-term)**

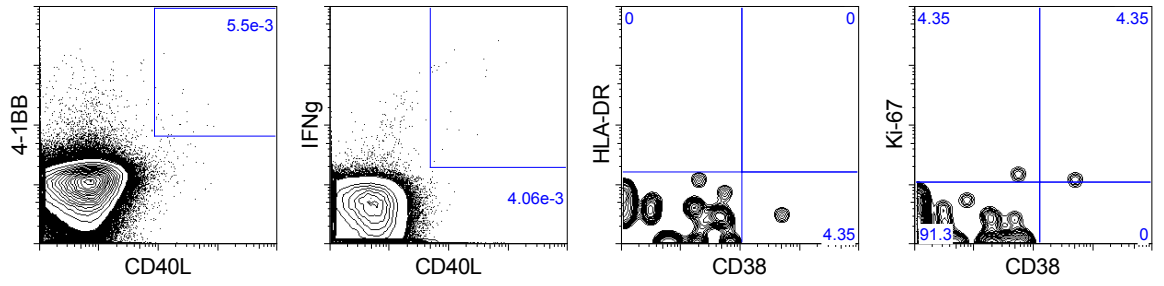

**HD66  
S-II (C-term)**

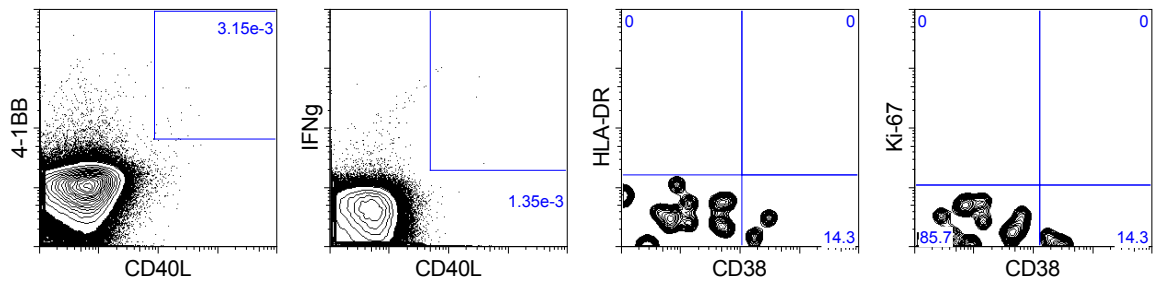

**HD66  
CMVpp65**

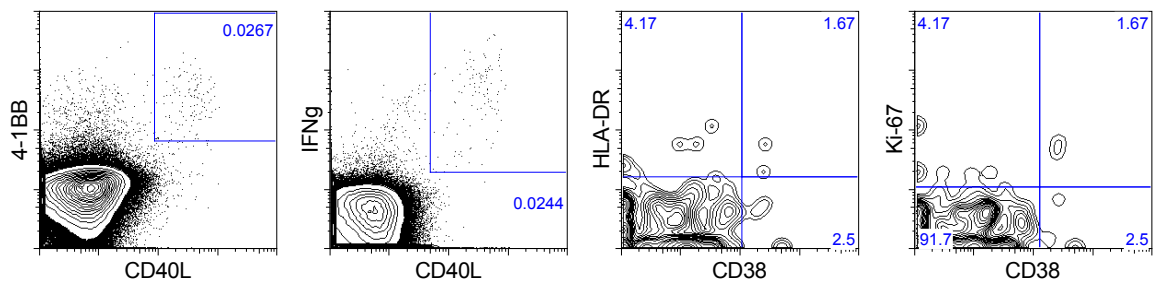

**HD66  
SEB/TSST1**

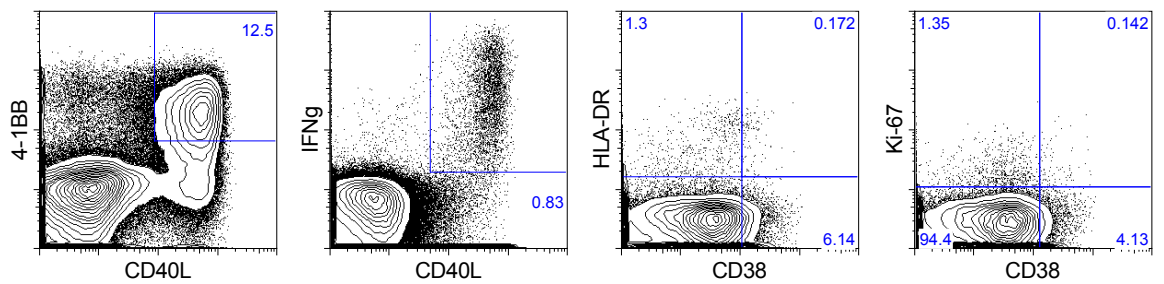

**HD67  
unstimulated**

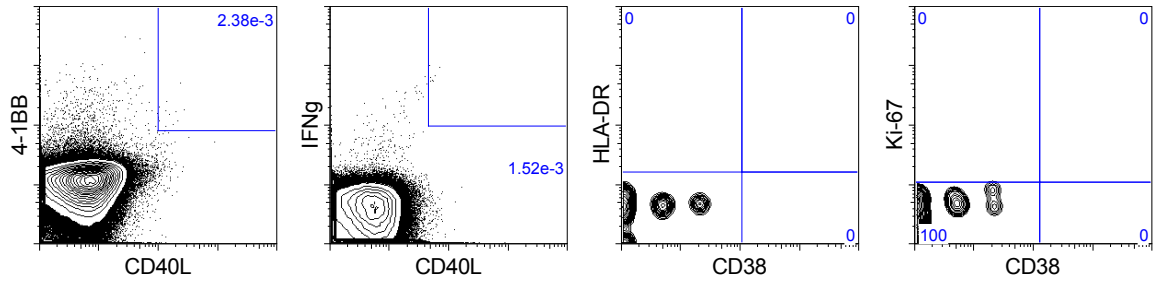

**HD67  
S-I (N-term)**

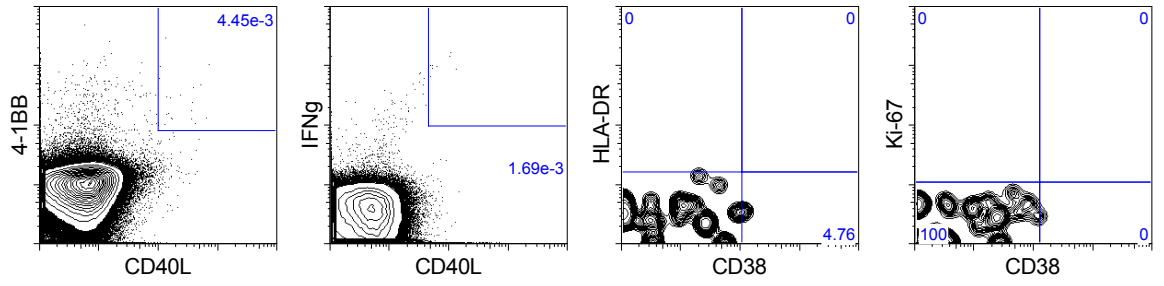

**HD67  
S-II (C-term)**

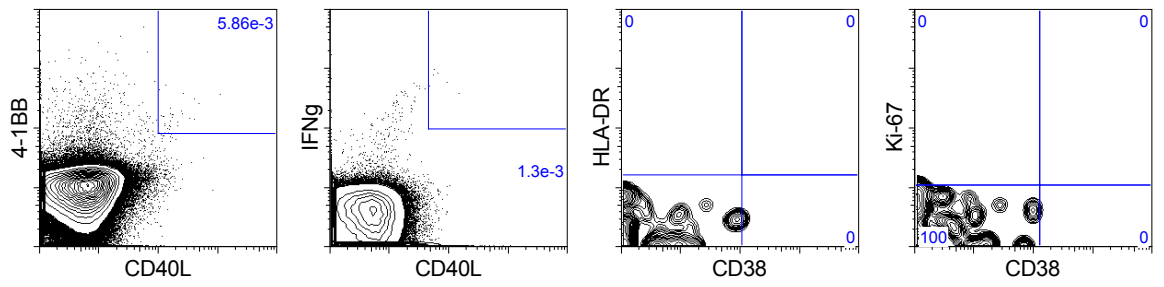

**HD67  
CMVpp65**

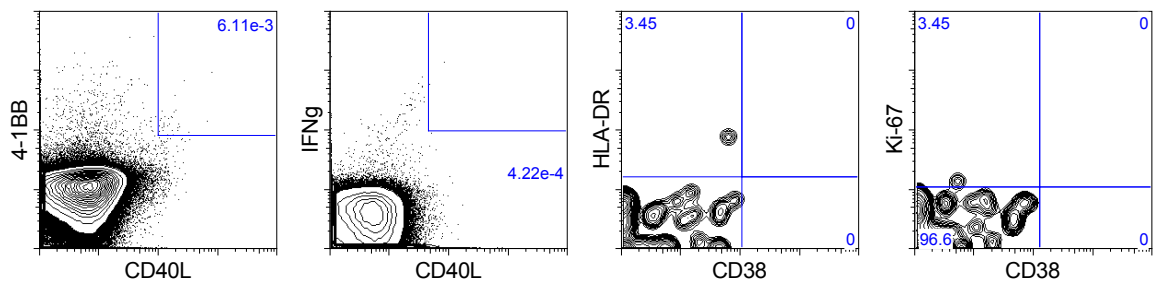

**HD67  
SEB/TSST1**

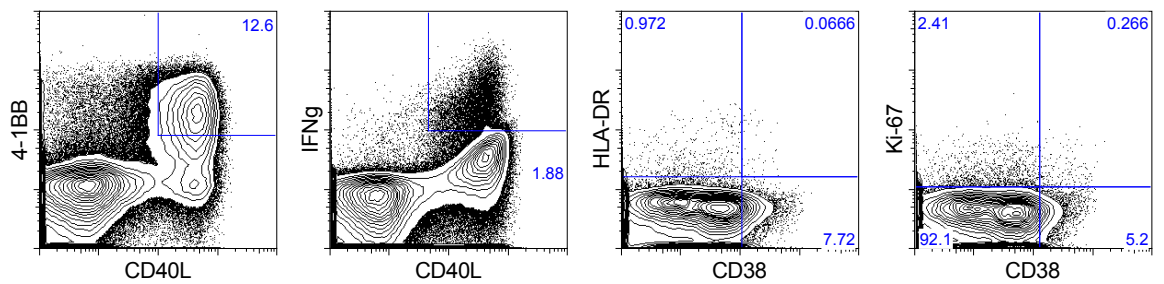

**HD68  
unstimulated**

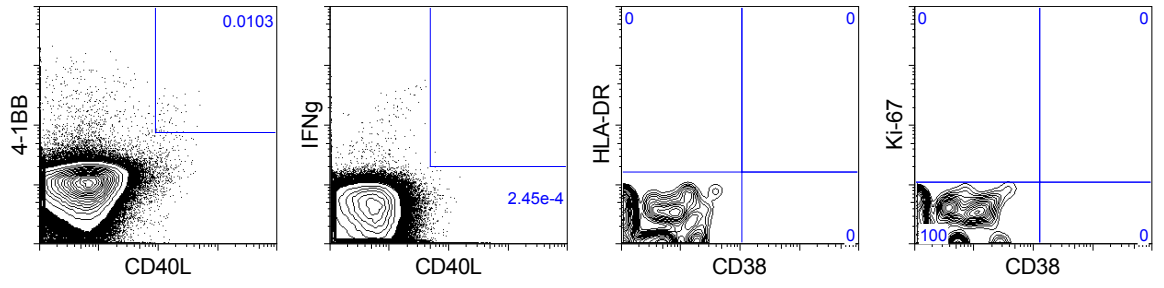

**HD68  
S-I (N-term)**

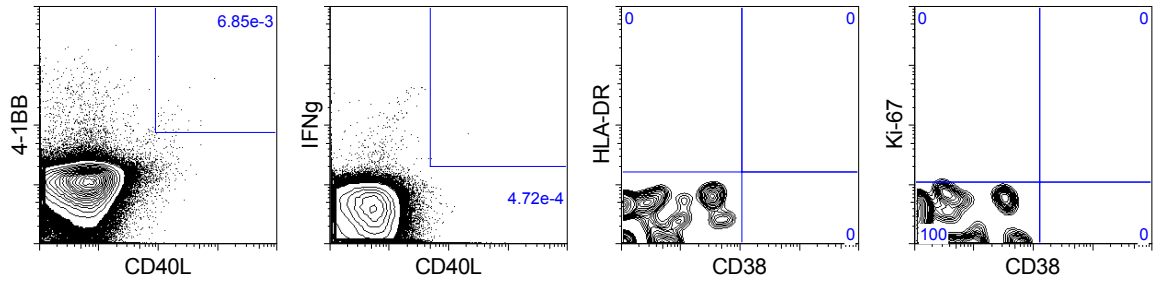

**HD68  
S-II (C-term)**

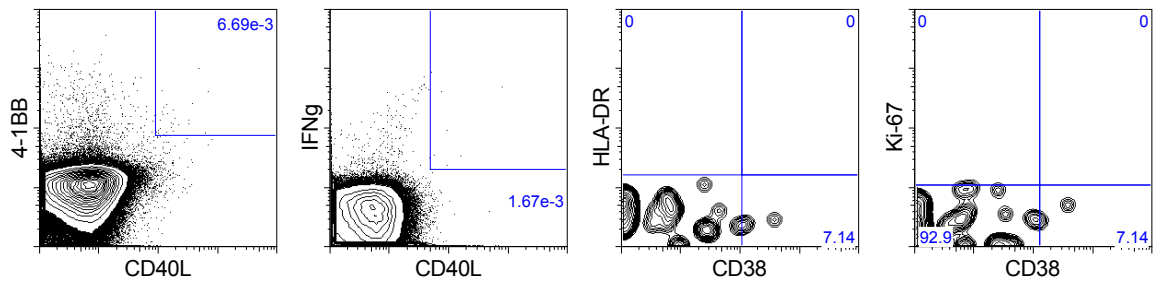

**HD68  
CMVpp65**

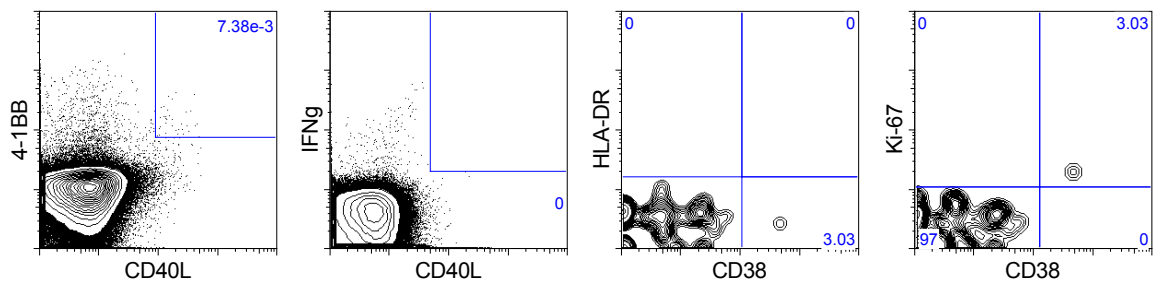

**HD68  
SEB/TSST1**

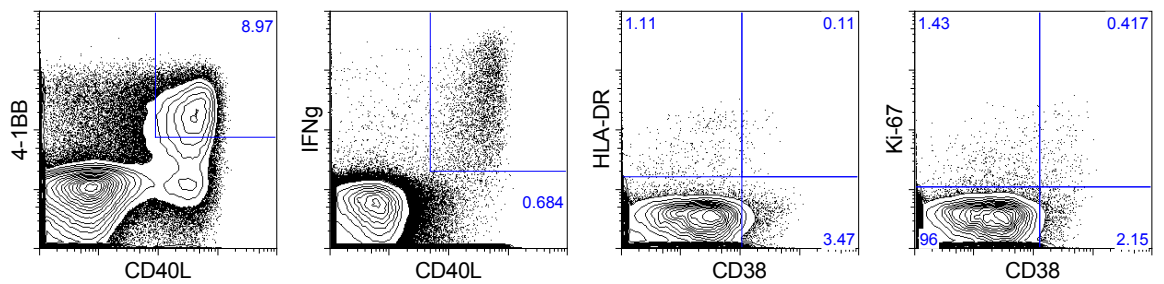



**HD70  
unstimulated**

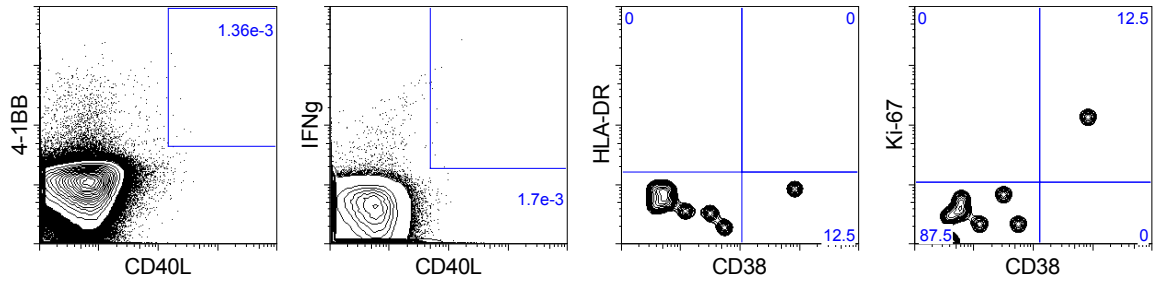

**HD70  
S-I (N-term)**

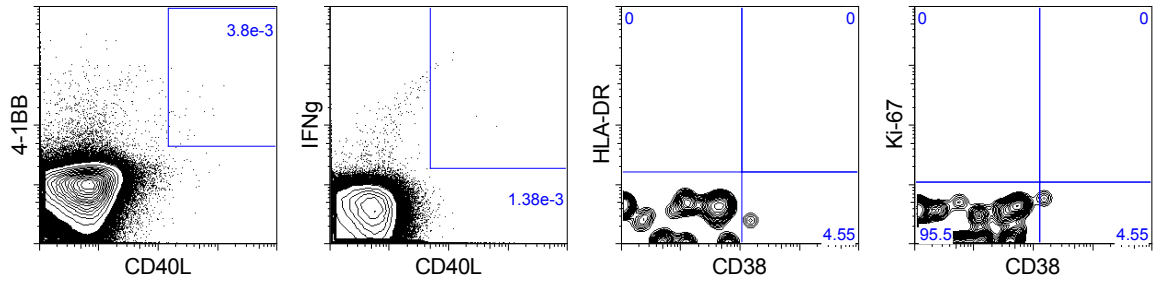

**HD70  
S-II (C-term)**

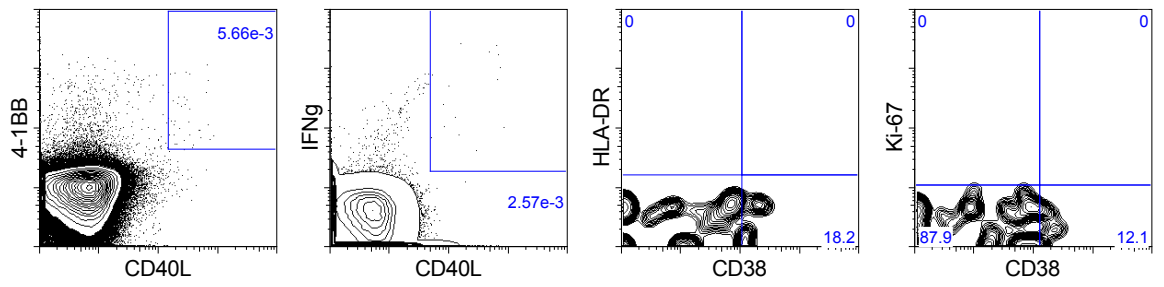

**HD70  
CMVpp65**

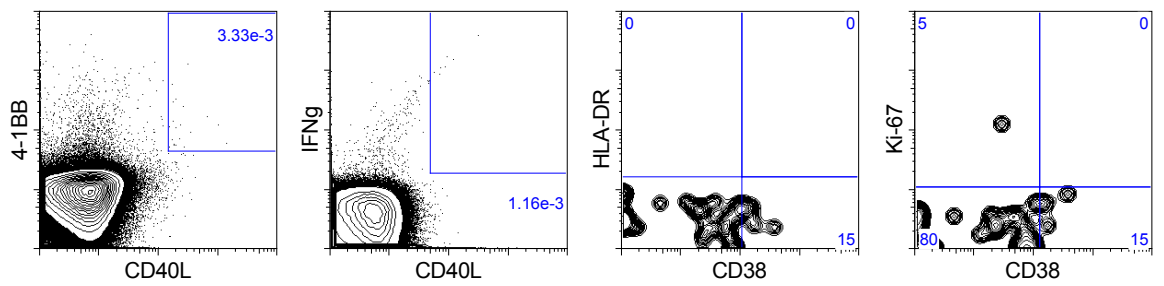

**HD70  
SEB/TSST1**

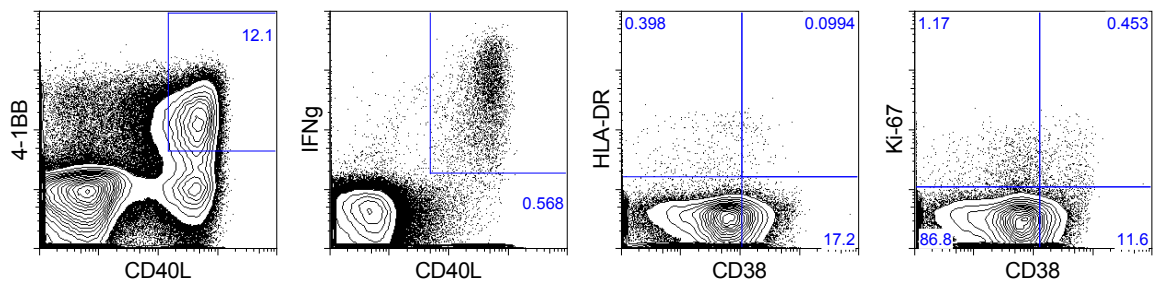



**HD72  
unstimulated**

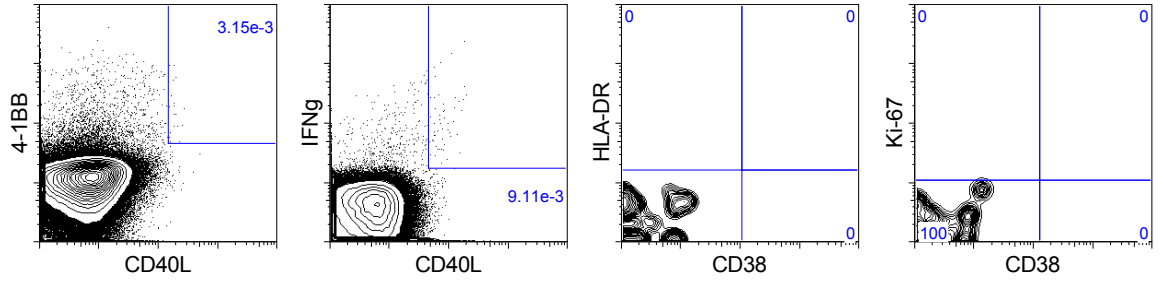

**HD72  
S-I (N-term)**

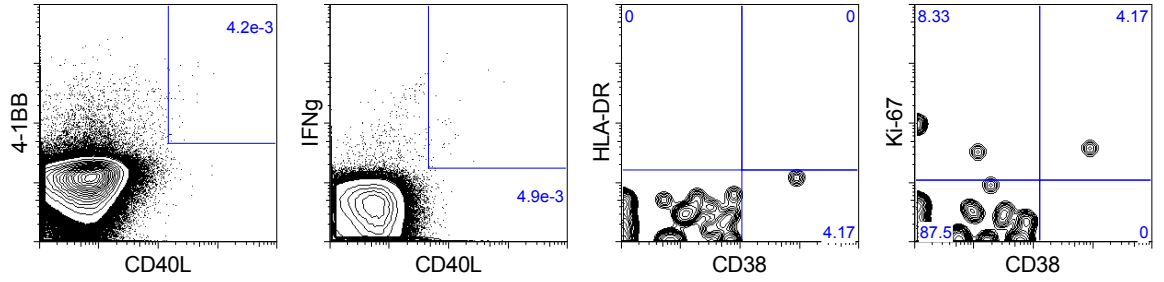

**HD72  
S-II (C-term)**

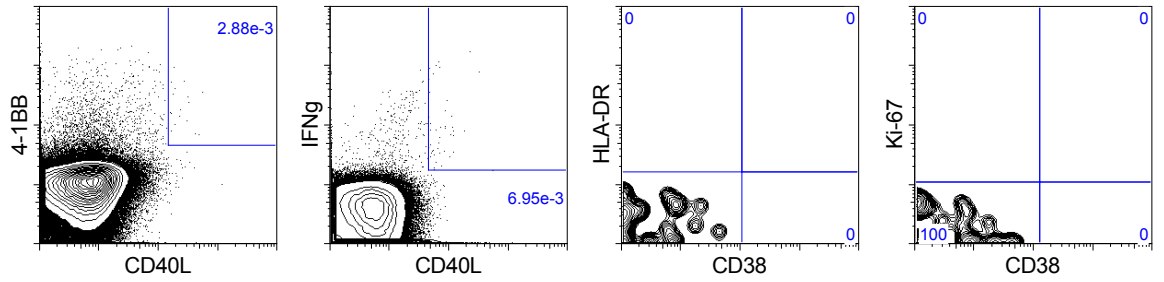

**HD72  
CMVpp65**

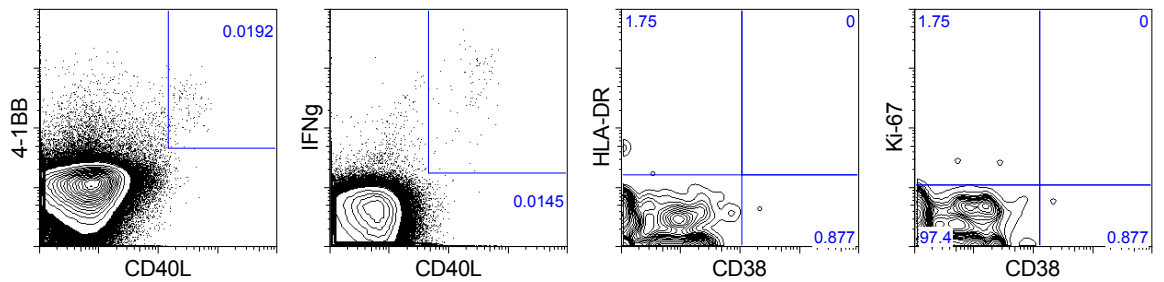

**HD72  
SEB/TSST1**

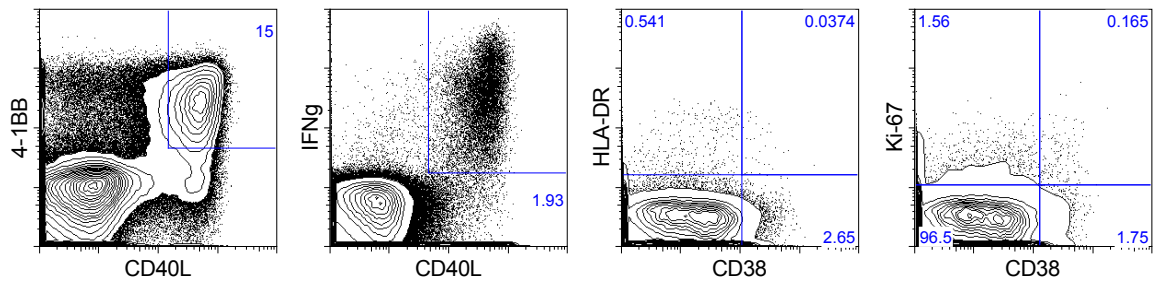

# Reactive Healthy Donors (RHD)

n=24

**HD01  
unstimulated**

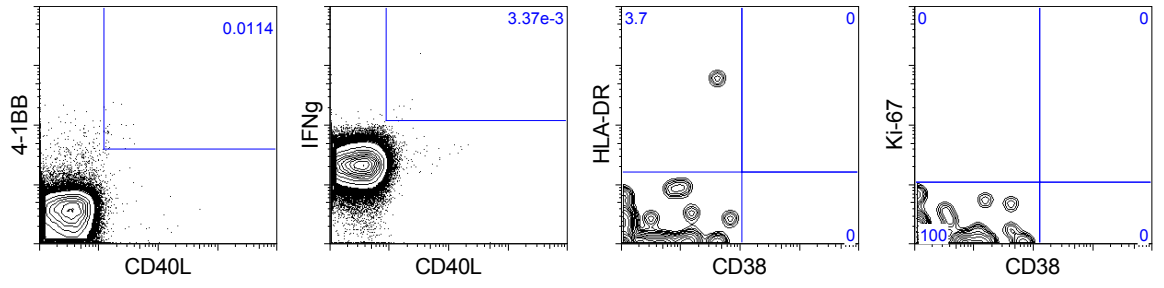

**HD01  
S-I (N-term)**

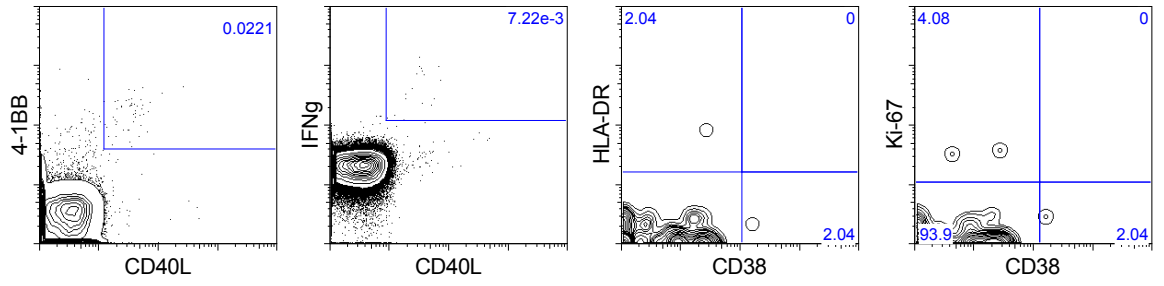

**HD01  
S-II (C-term)**

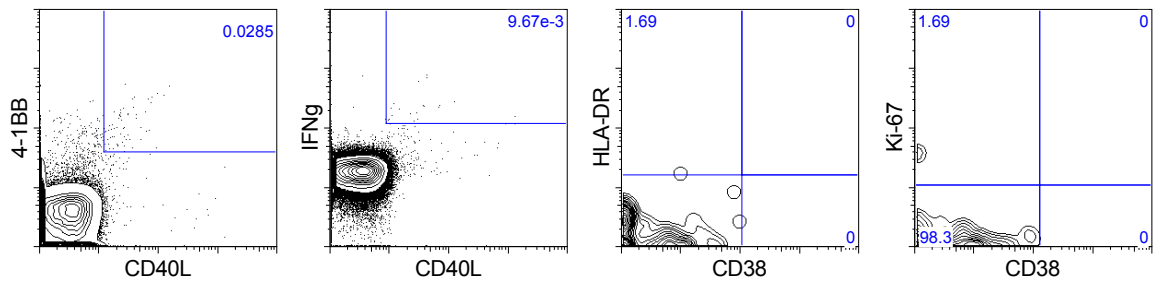

**HD01  
CMVpp65**

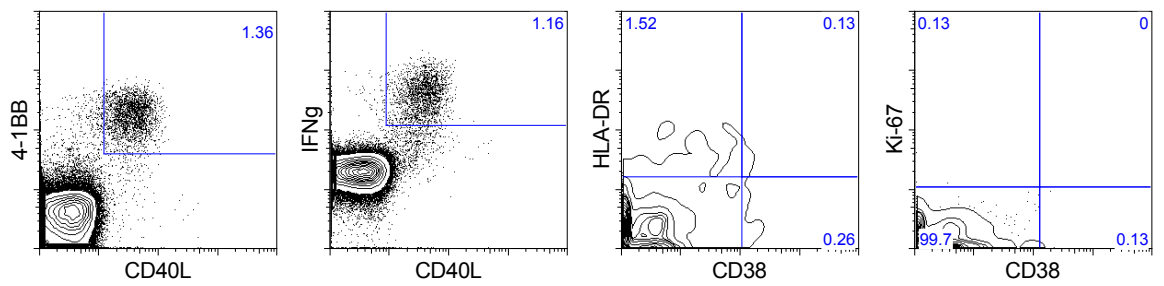

**HD01  
SEB/TSST1**

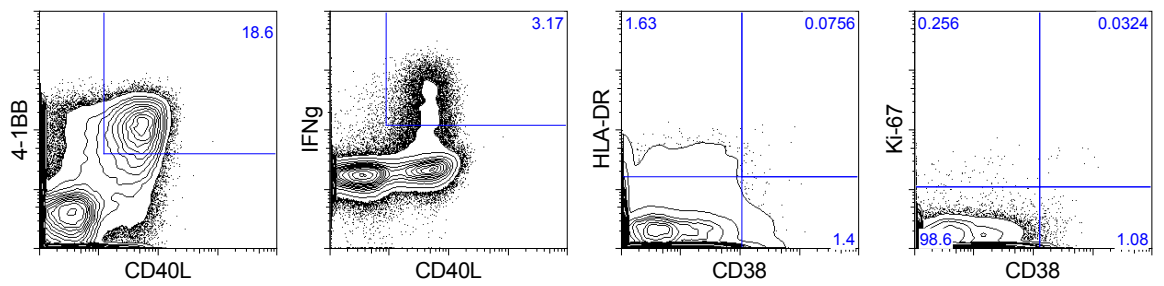

**HD02  
unstimulated**

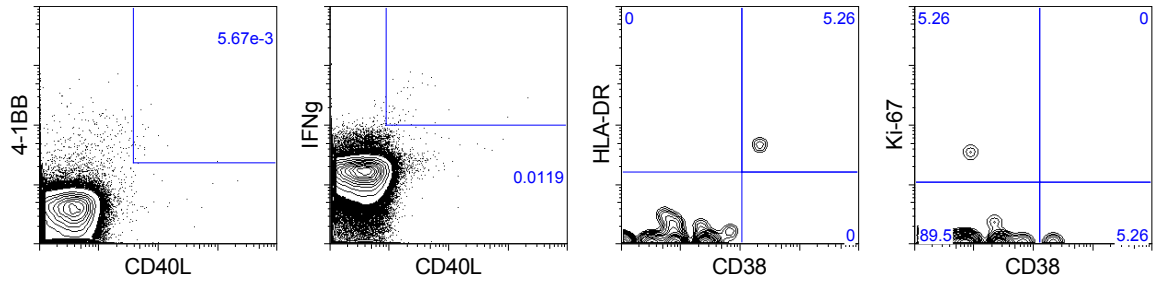

**HD02  
S-I (N-term)**

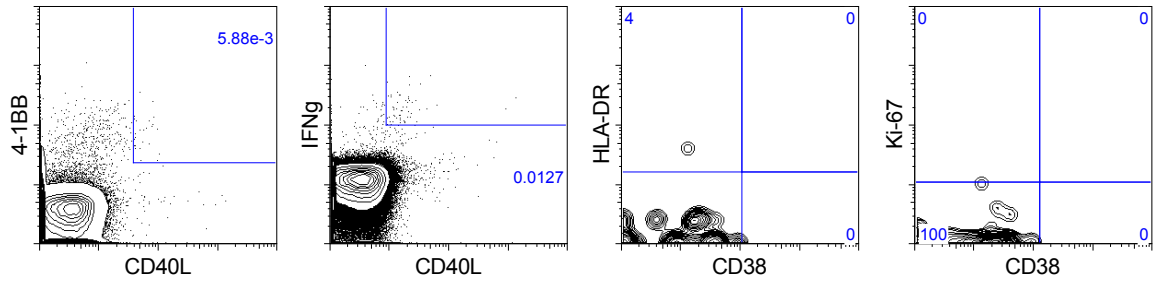

**HD02  
S-II (C-term)**

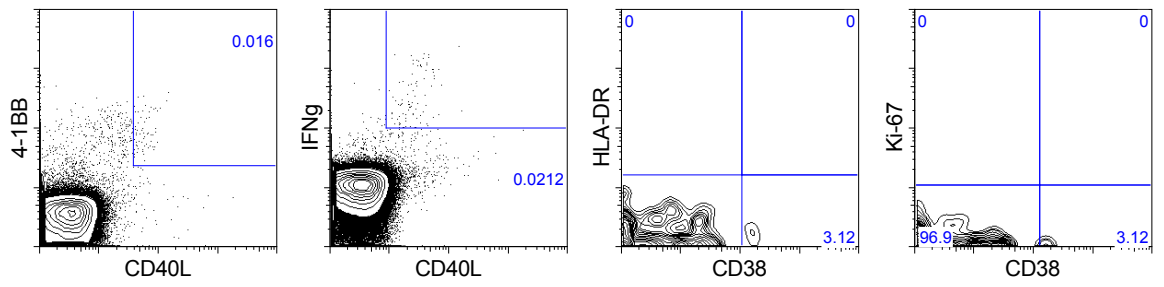

**HD02  
CMVpp65**

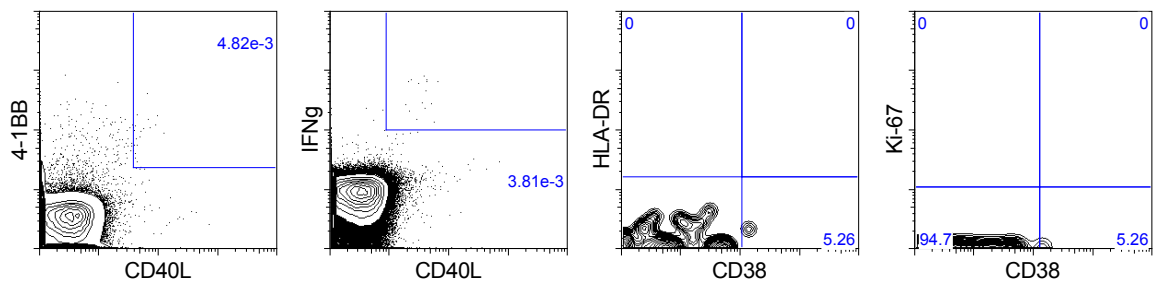

**HD02  
SEB/TSST1**

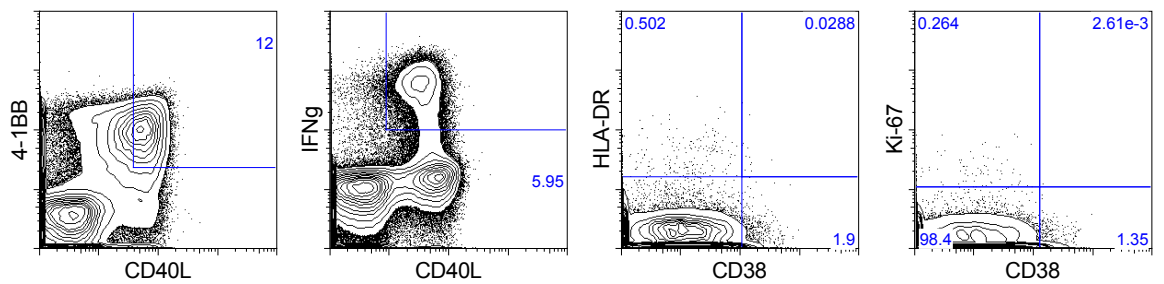

**HD05  
unstimulated**

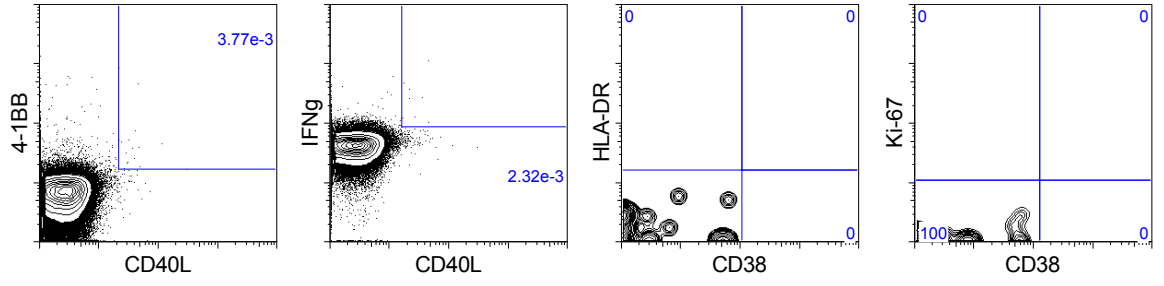

**HD05  
S-I (N-term)**

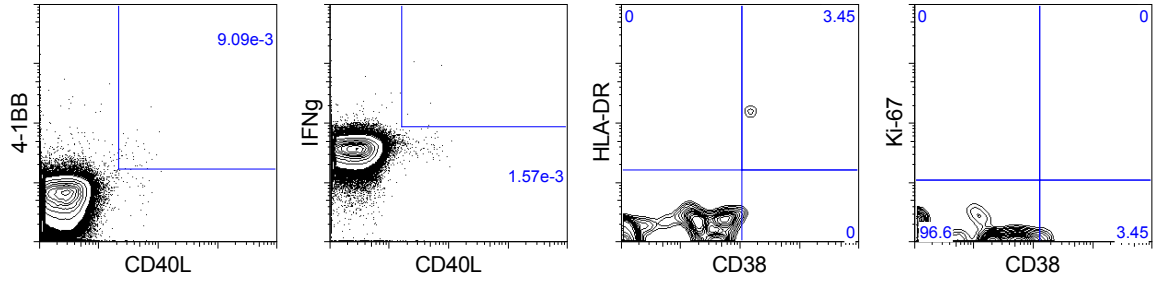

**HD05  
S-II (C-term)**

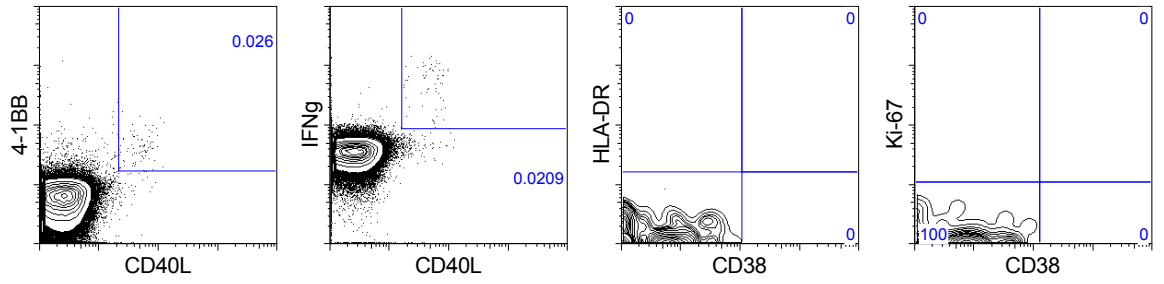

**HD05  
CMVpp65**

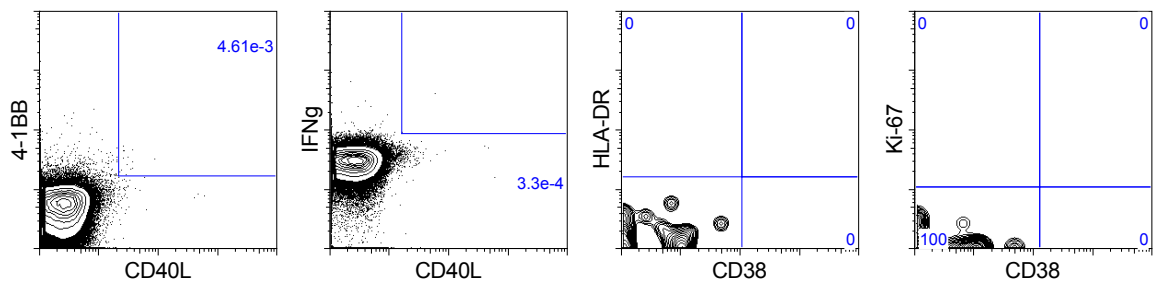

**HD05  
SEB/TSST1**

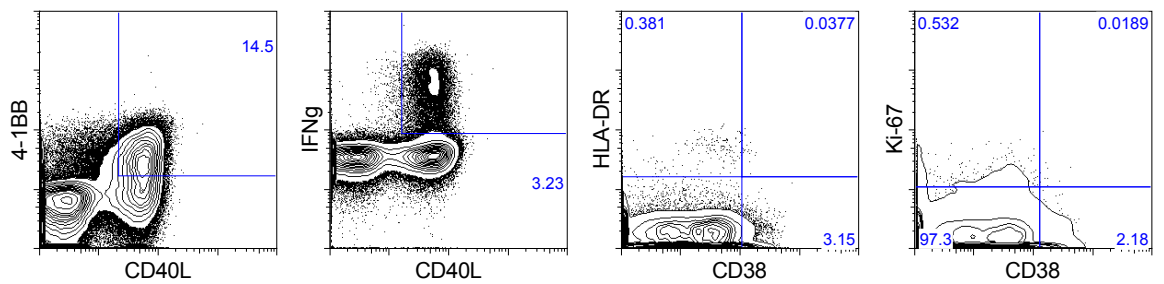

**HD06  
unstimulated**

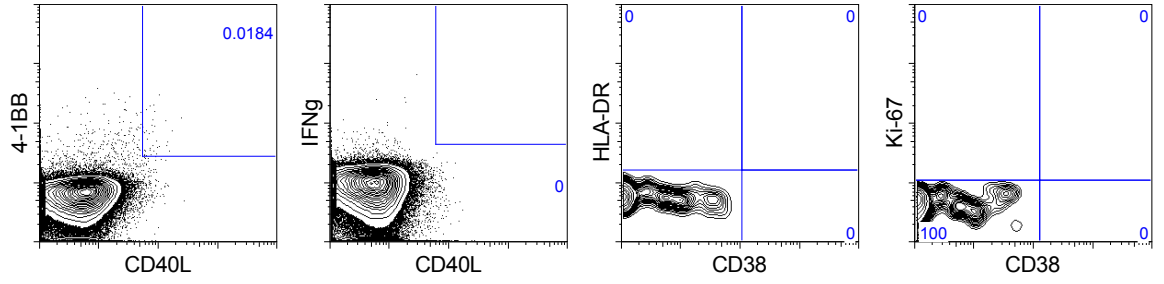

**HD06  
S-I (N-term)**

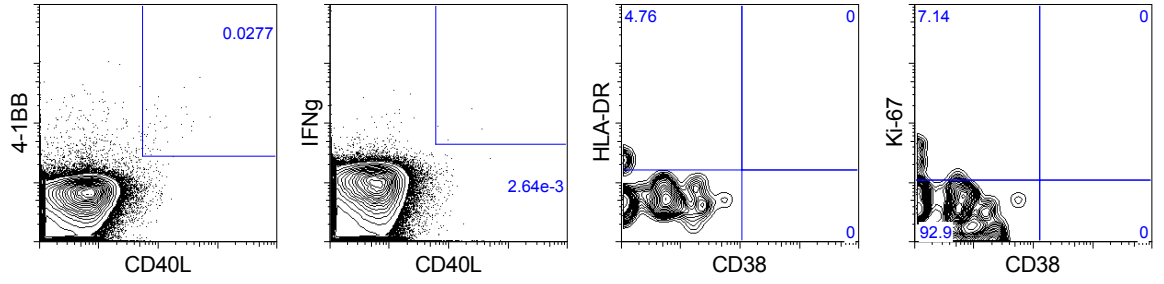

**HD06  
S-II (C-term)**

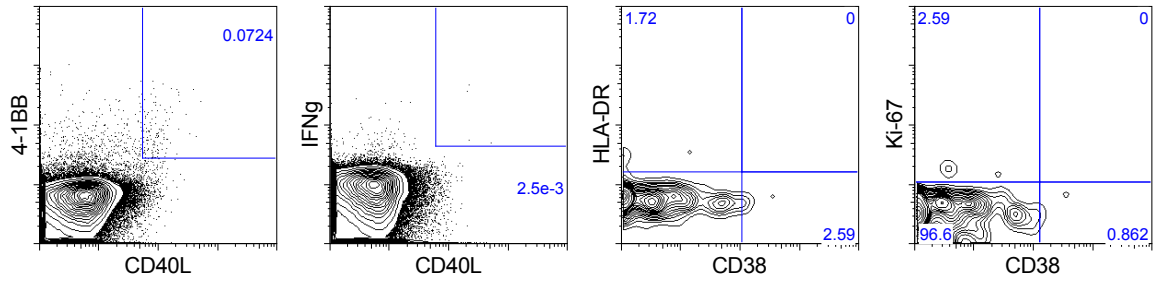

**HD06  
CMVpp65**

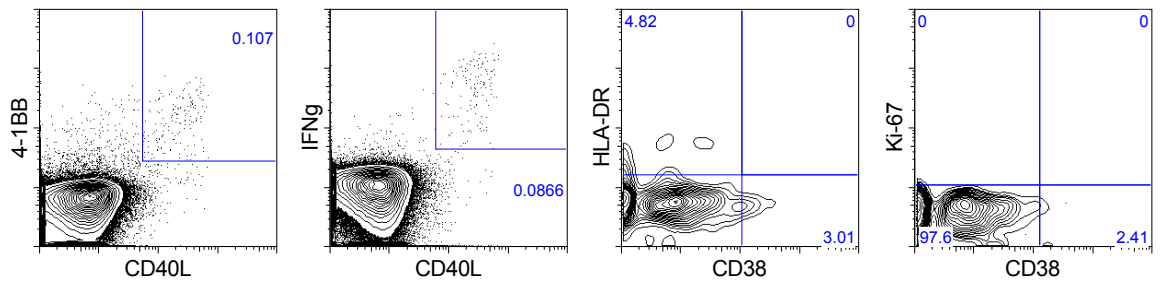

**HD06  
SEB/TSST1**

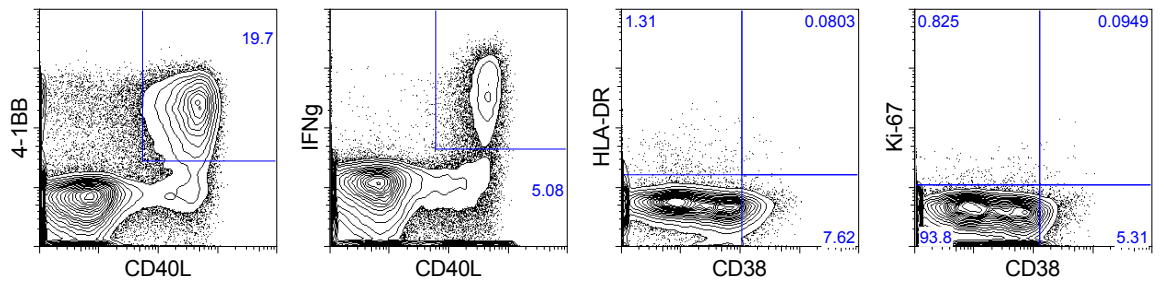

**HD07  
unstimulated**

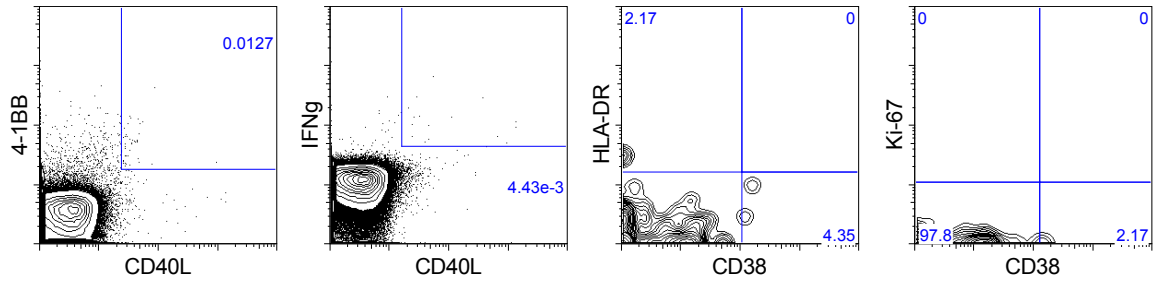

**HD07  
S-I (N-term)**

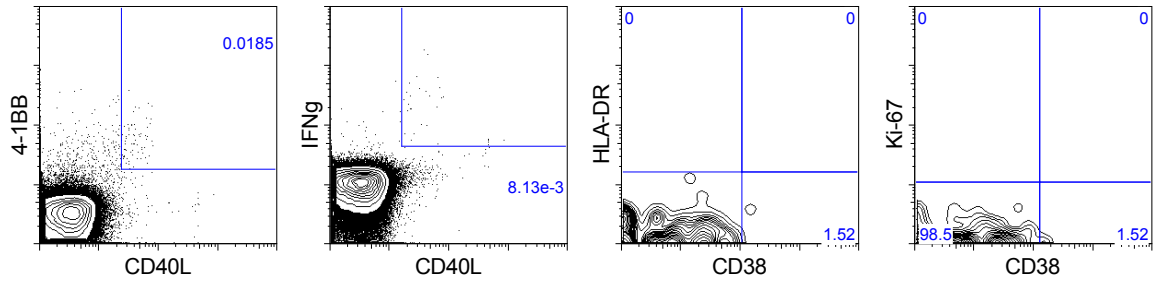

**HD07  
S-II (C-term)**

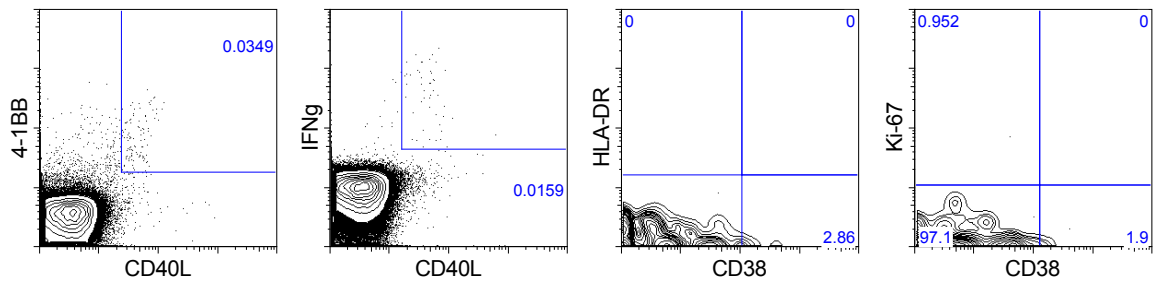

**HD07  
CMVpp65**

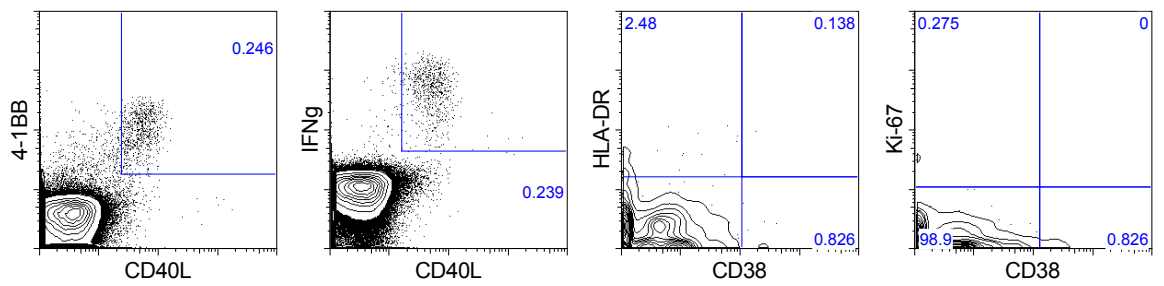

**HD07  
SEB/TSST1**

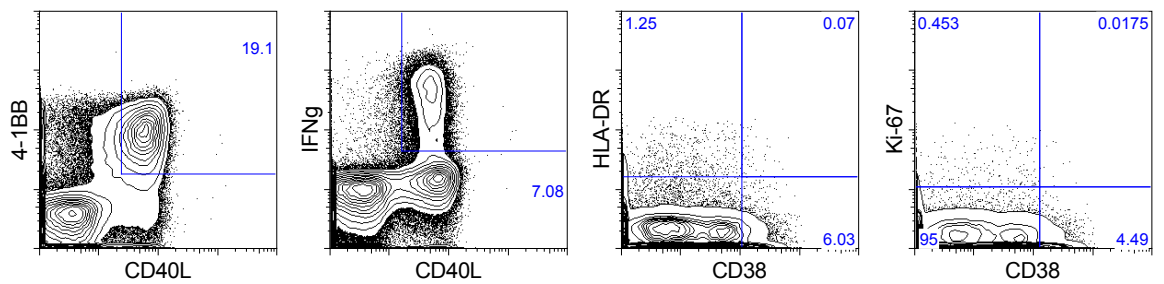



**HD15  
unstimulated**

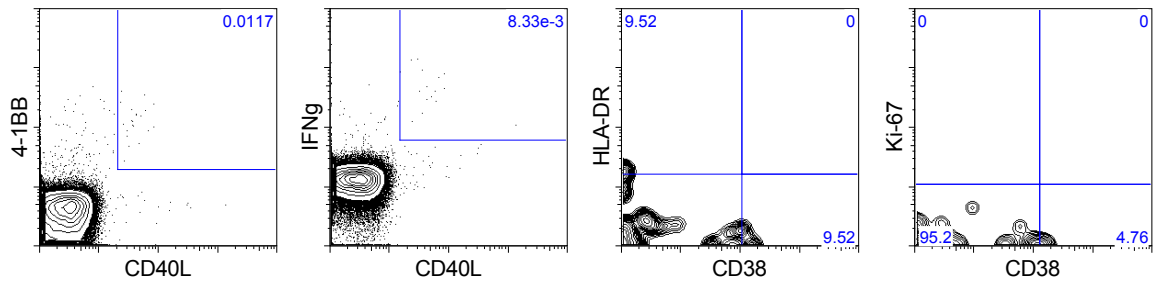

**HD15  
S-I (N-term)**

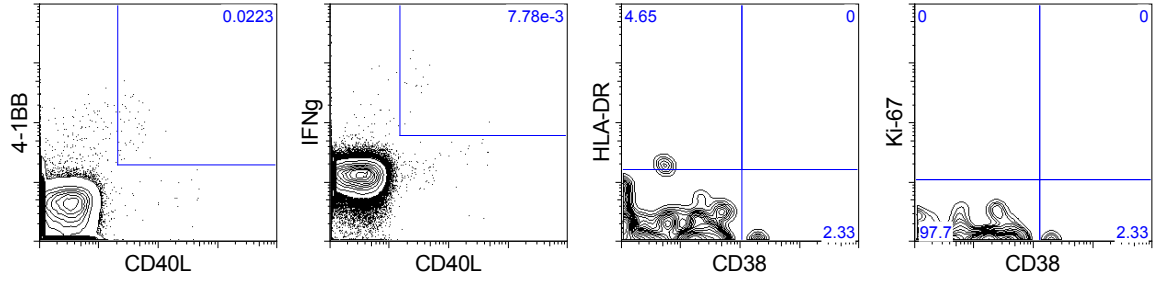

**HD15  
S-II (C-term)**

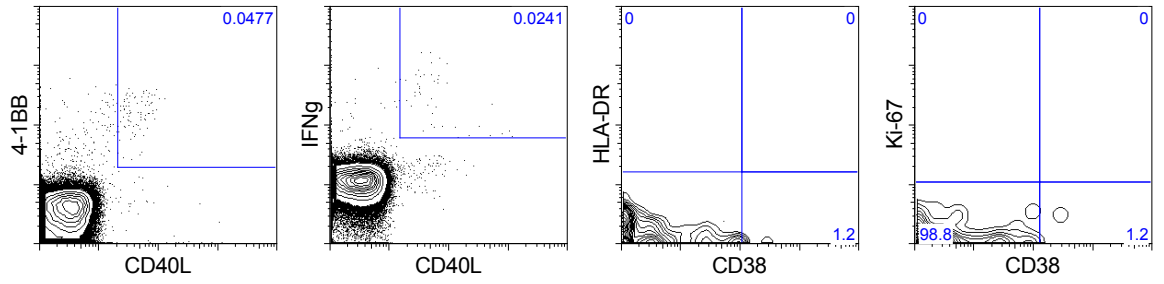

**HD15  
CMVpp65**

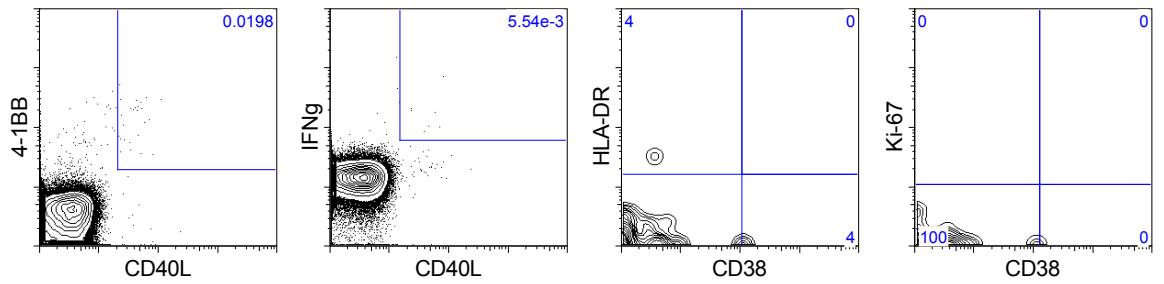

**HD15  
SEB/TSST1**

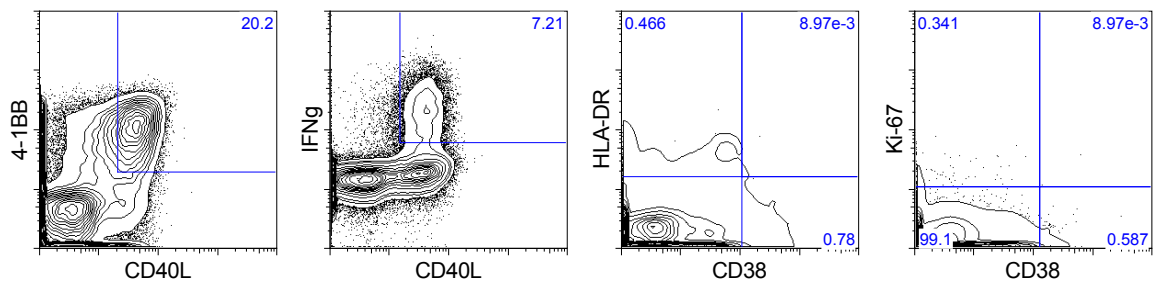

**HD16  
unstimulated**

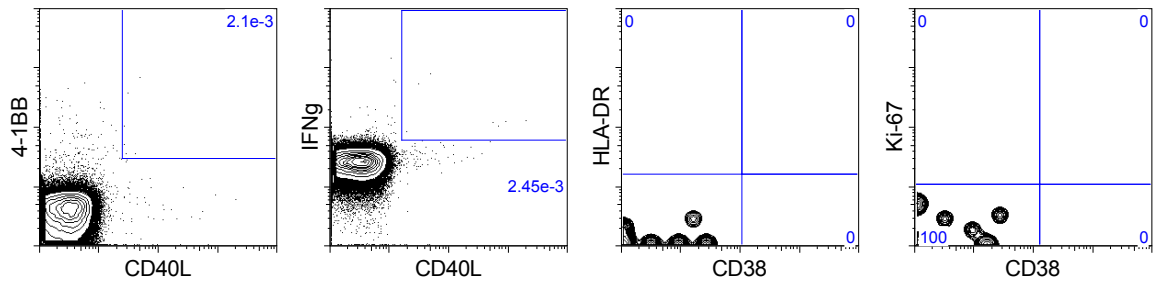

**HD16  
S-I (N-term)**

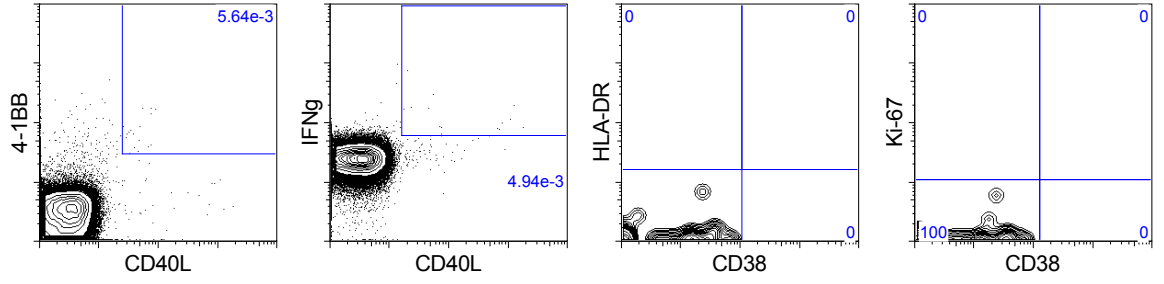

**HD16  
S-II (C-term)**

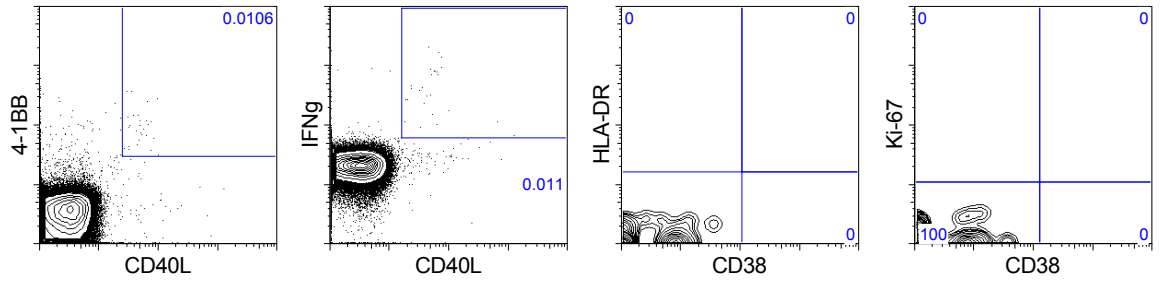

**HD16  
CMVpp65**

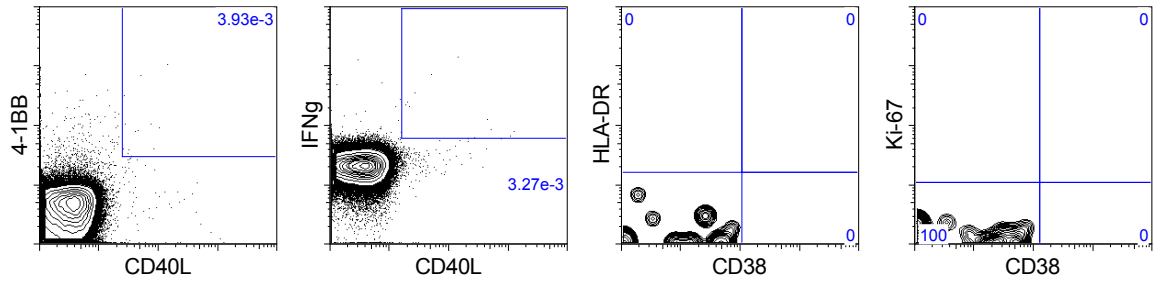

**HD16  
SEB/TSST1**

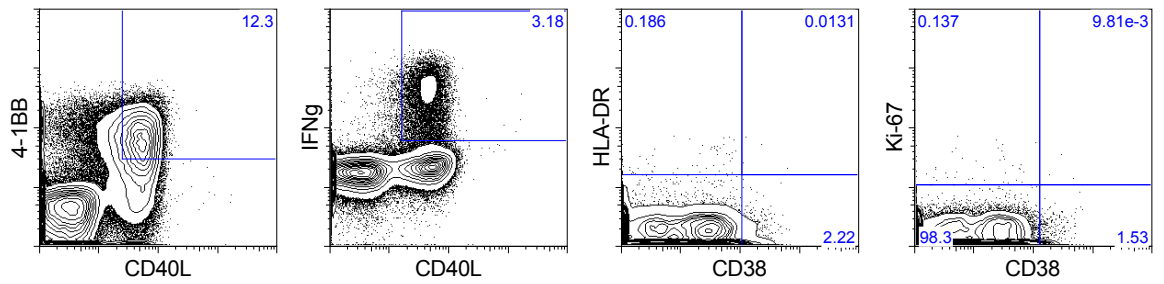

**HD20  
unstimulated**

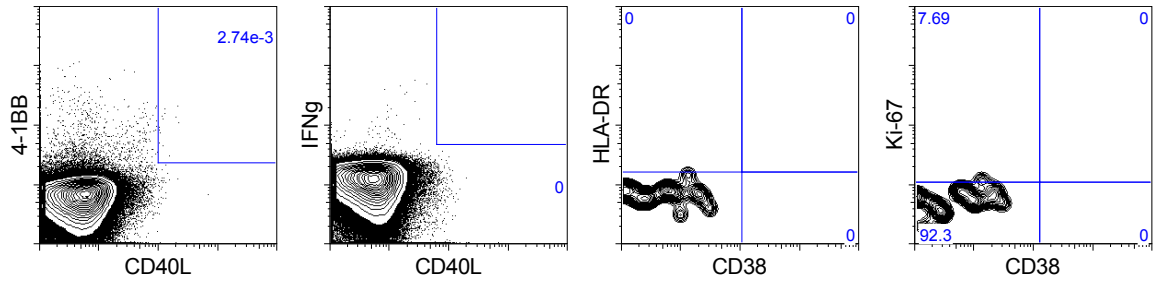

**HD20  
S-I (N-term)**

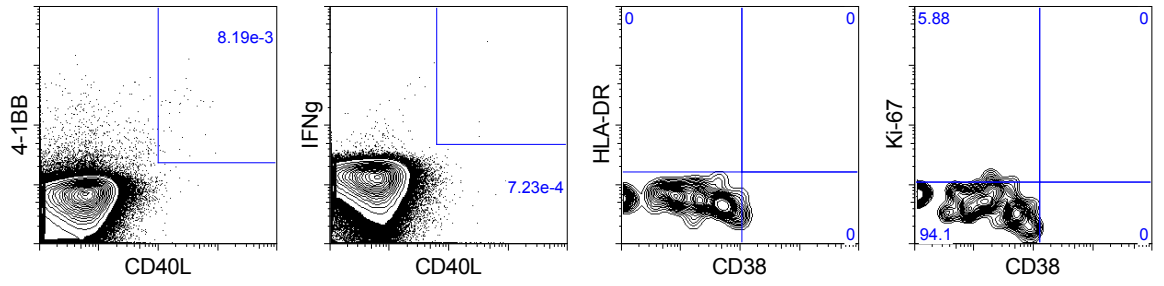

**HD20  
S-II (C-term)**

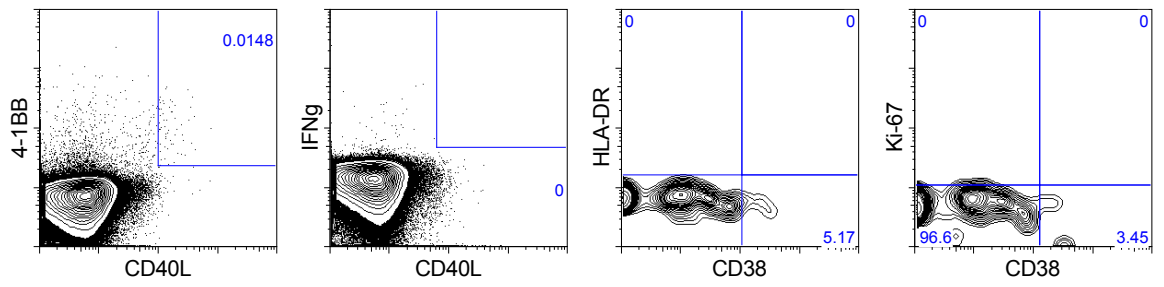

**HD20  
CMVpp65**

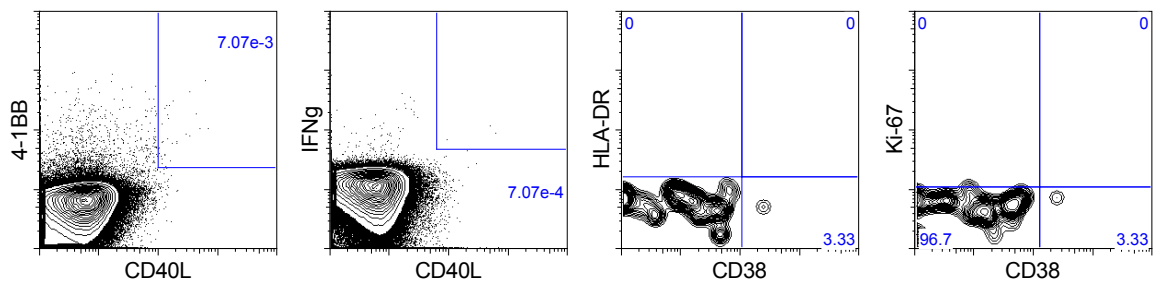

**HD20  
SEB/TSST1**

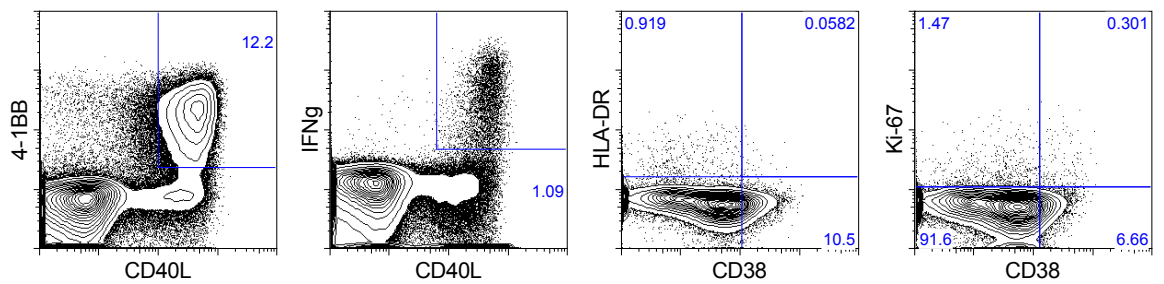

**HD21  
unstimulated**

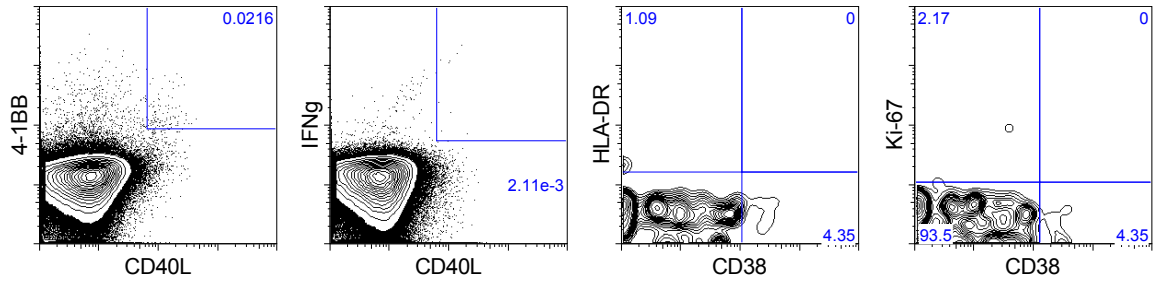

**HD21  
S-I (N-term)**

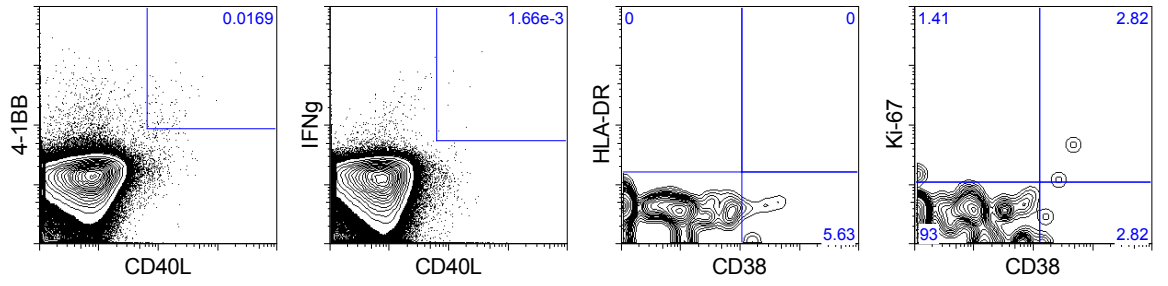

**HD21  
S-II (C-term)**

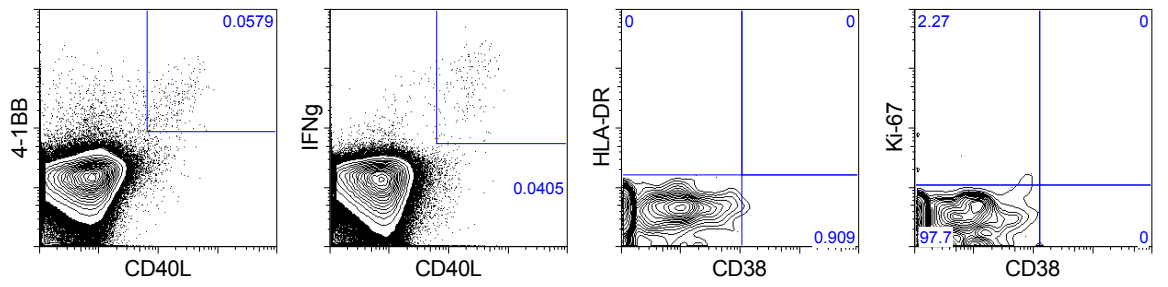

**HD21  
CMVpp65**

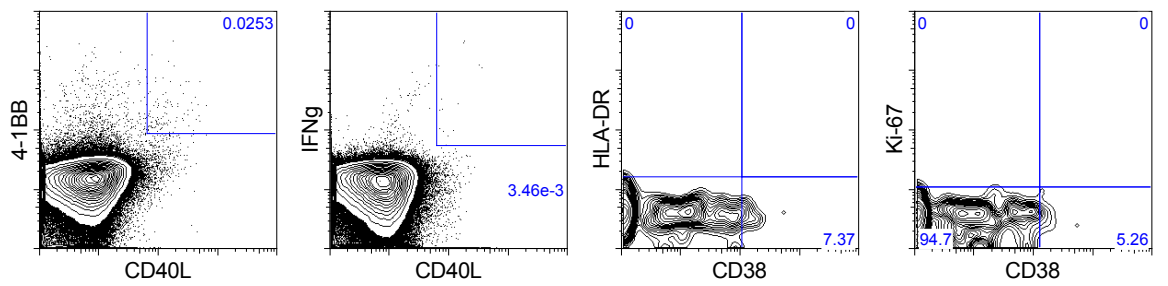

**HD21  
SEB/TSST1**

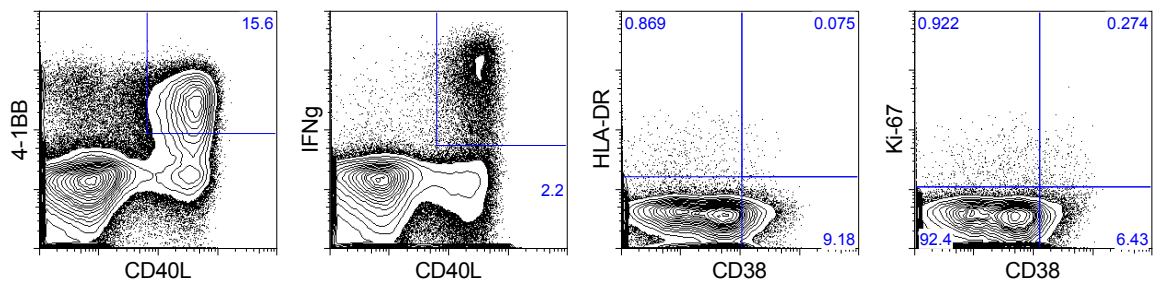

**HD22  
unstimulated**

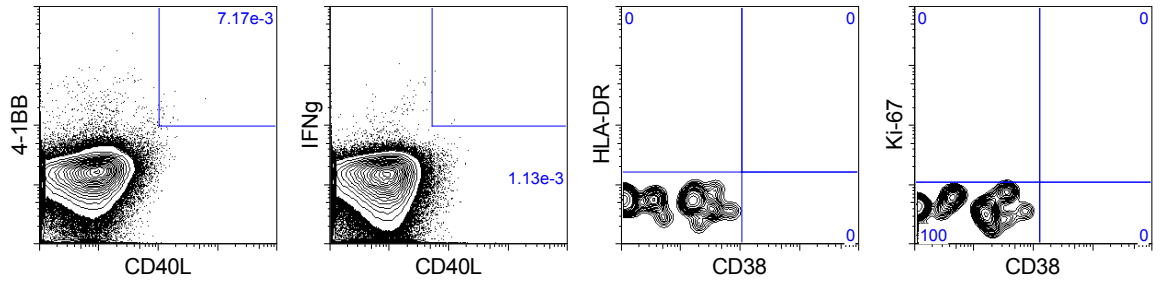

**HD22  
S-I (N-term)**

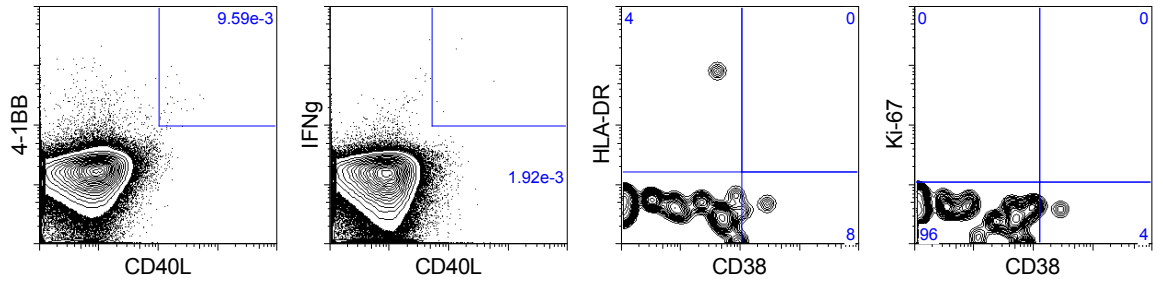

**HD22  
S-II (C-term)**

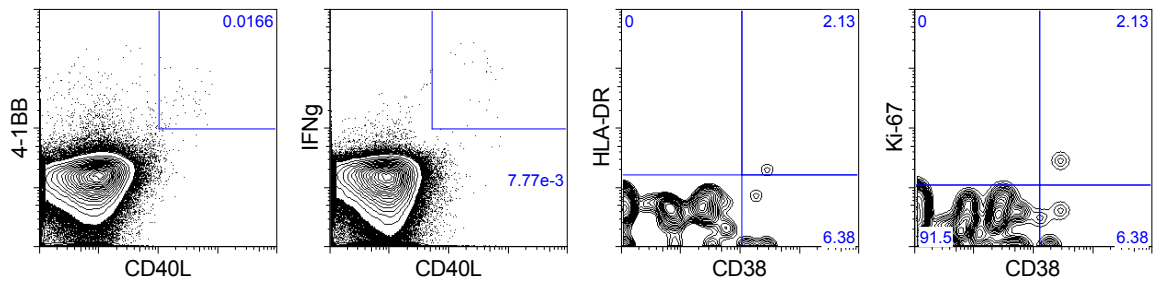

**HD22  
CMVpp65**

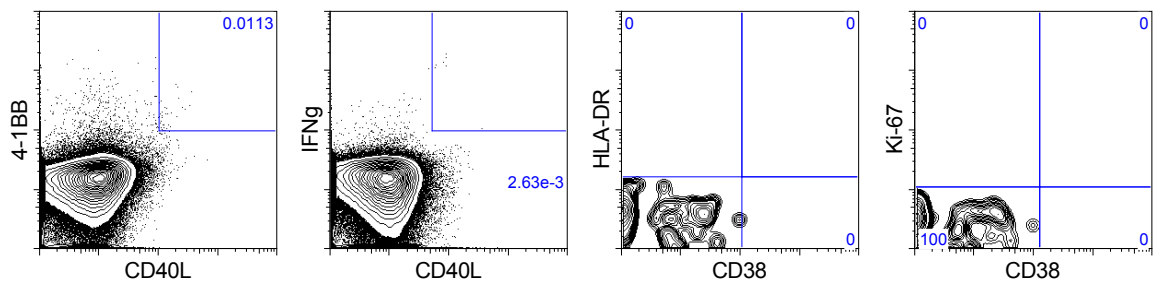

**HD22  
SEB/TSST1**

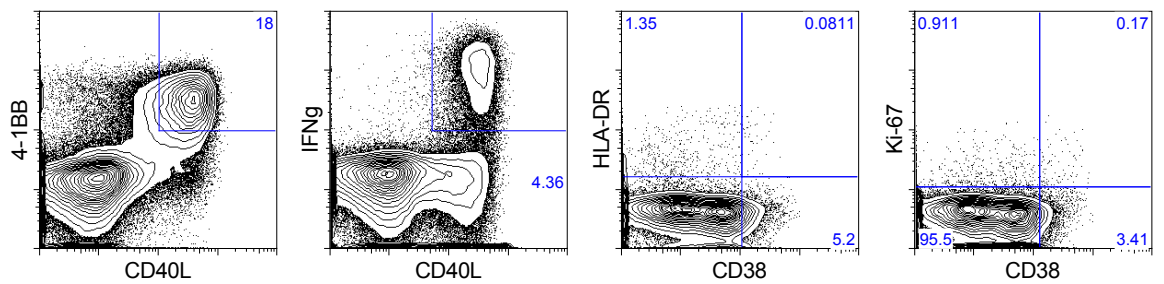

**HD30  
unstimulated**

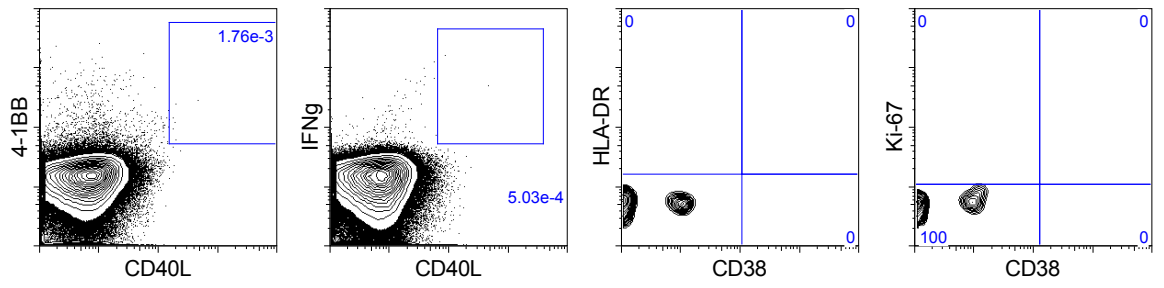

**HD30  
S-I (N-term)**

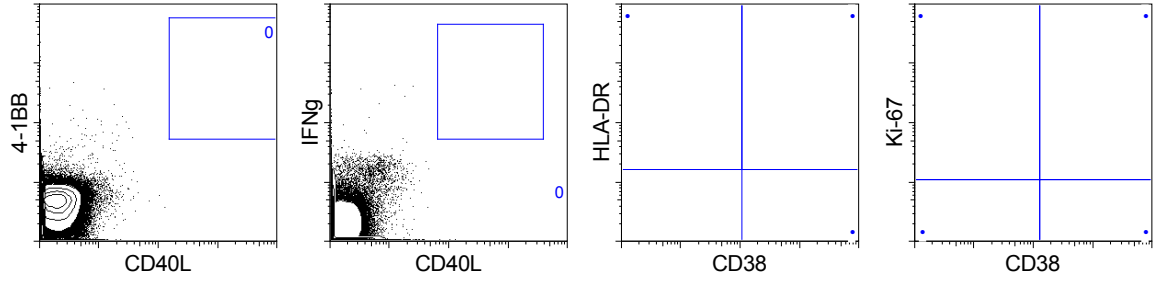

**HD30  
S-II (C-term)**

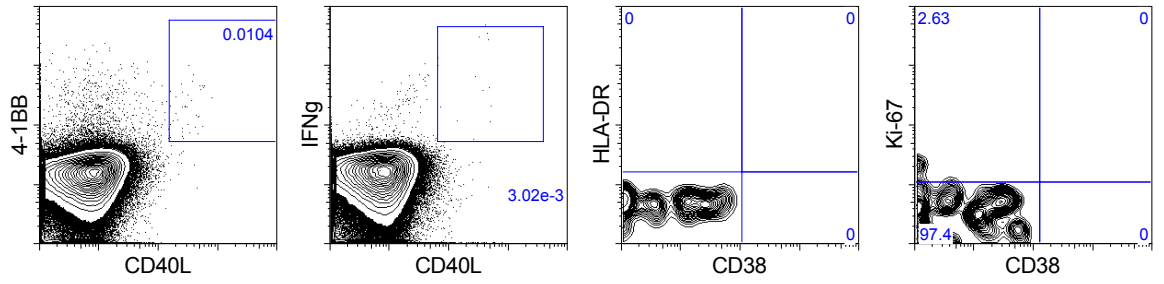

**HD30  
CMVpp65**

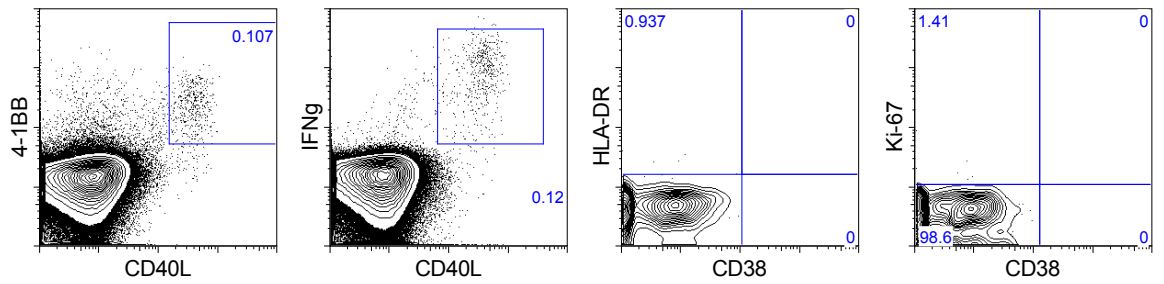

**HD30  
SEB/TSST1**

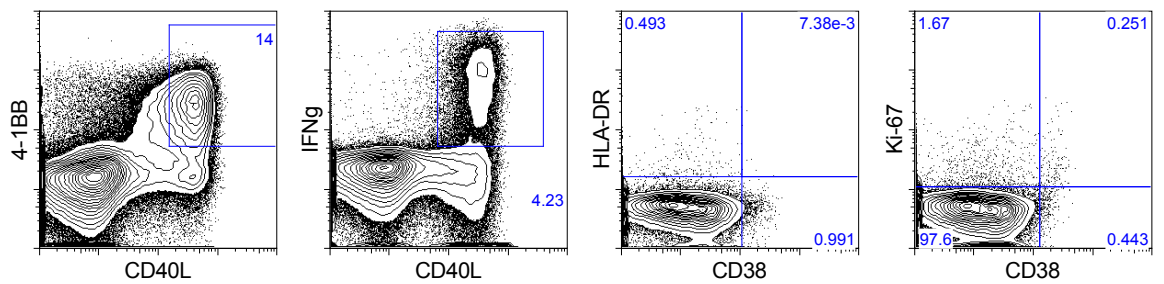

**HD34  
unstimulated**

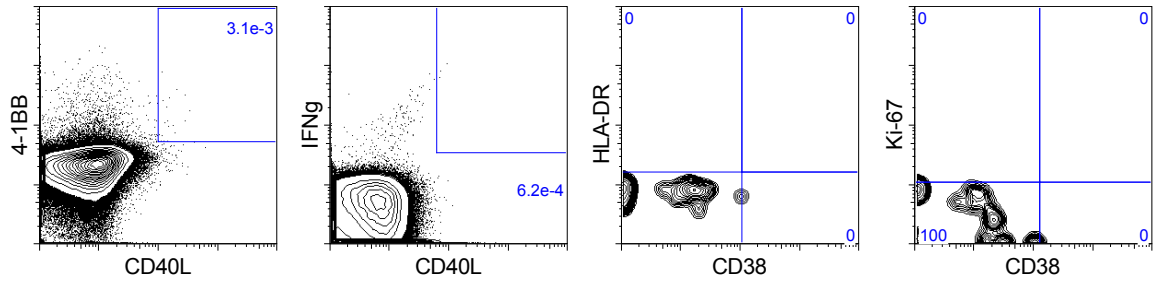

**HD34  
S-I (N-term)**

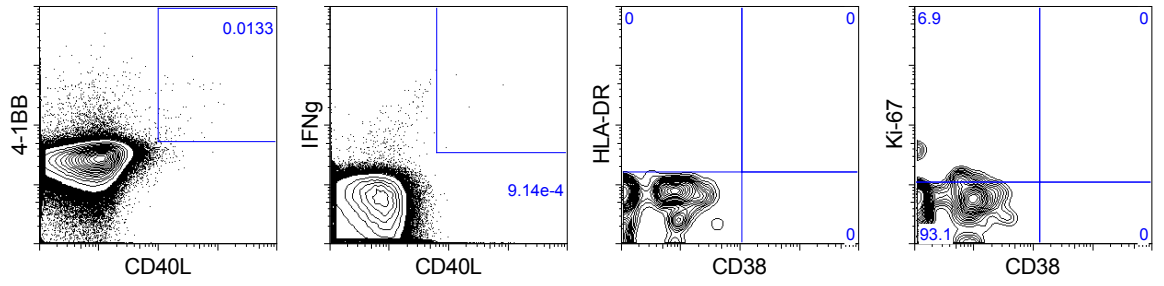

**HD34  
S-II (C-term)**

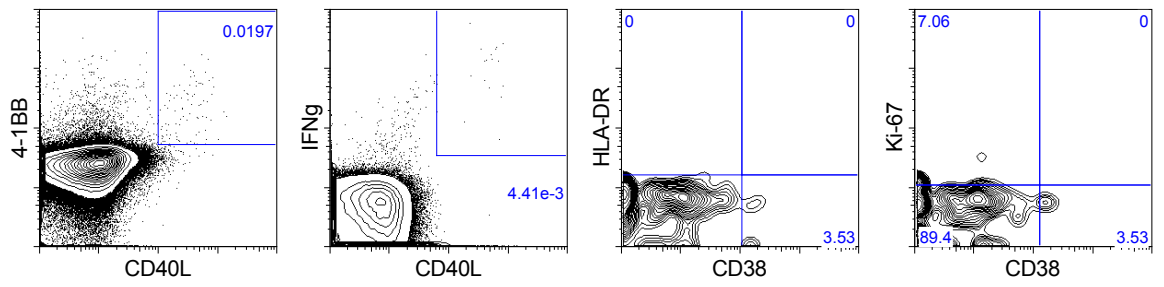

**HD34  
CMVpp65**

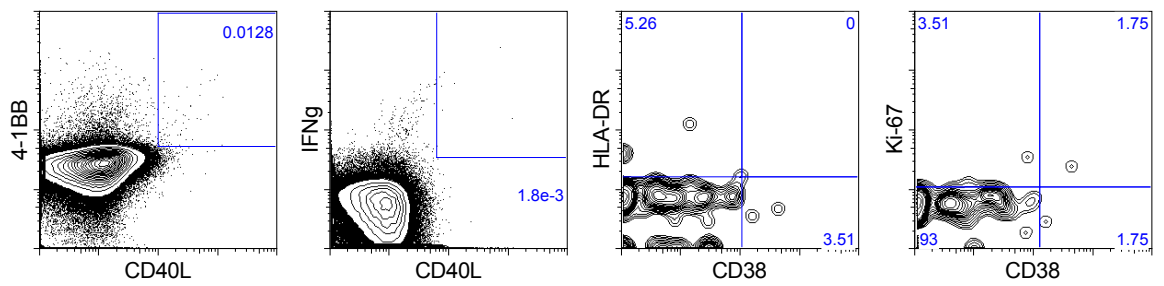

**HD34  
SEB/TSST1**

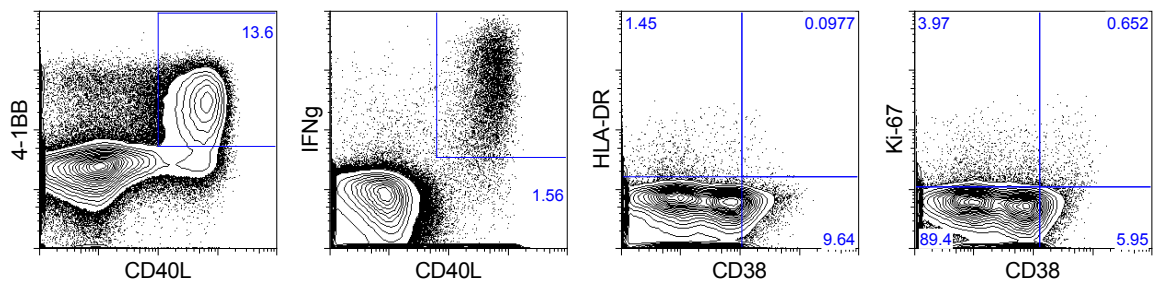



**HD35  
unstimulated**

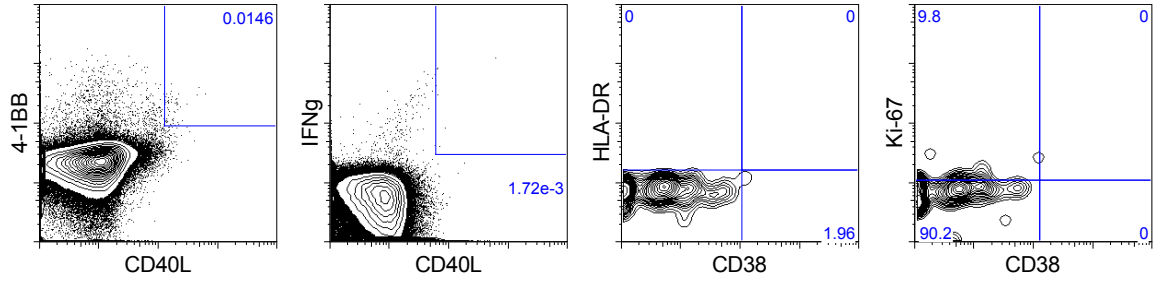

**HD35  
S-I (N-term)**

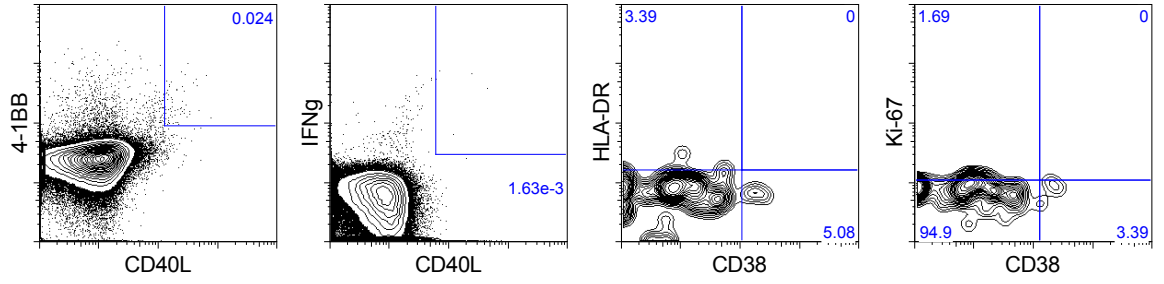

**HD35  
S-II (C-term)**

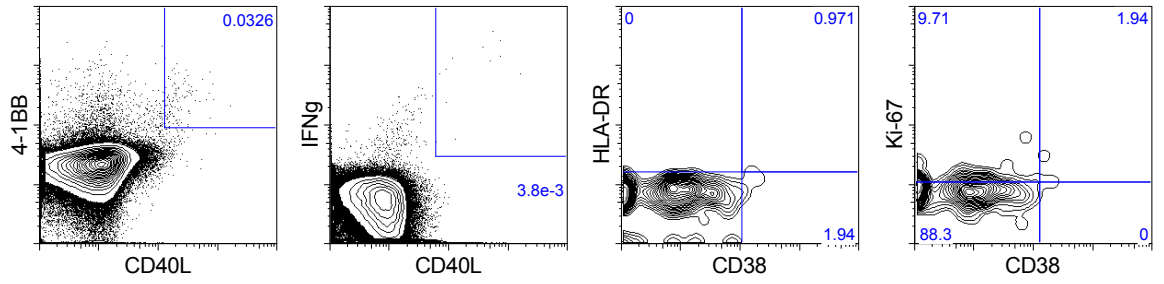

**HD35  
CMVpp65**

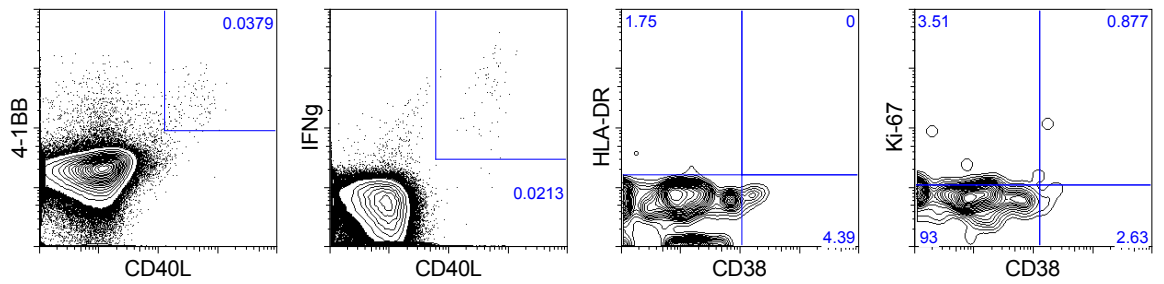

**HD35  
SEB/TSST1**

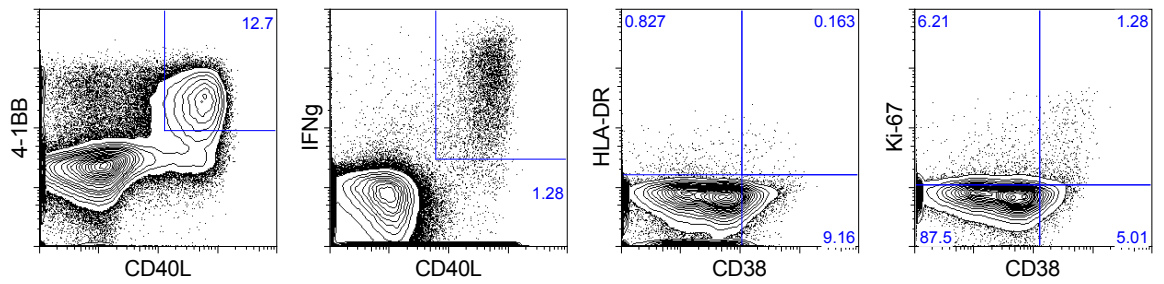

**HD36  
unstimulated**

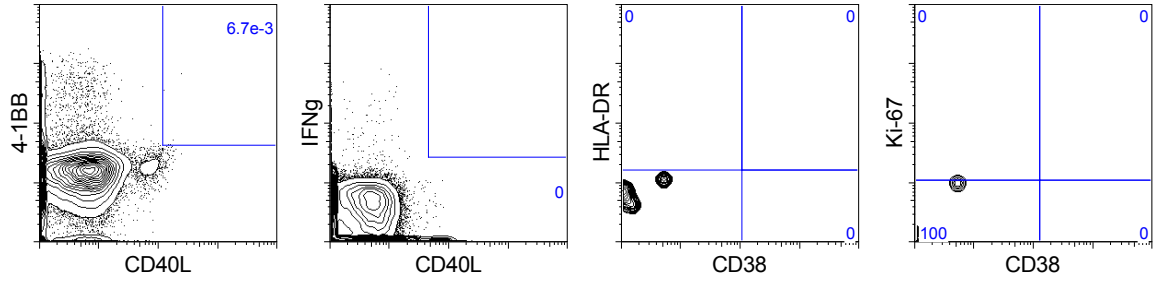

**HD36  
S-I (N-term)**

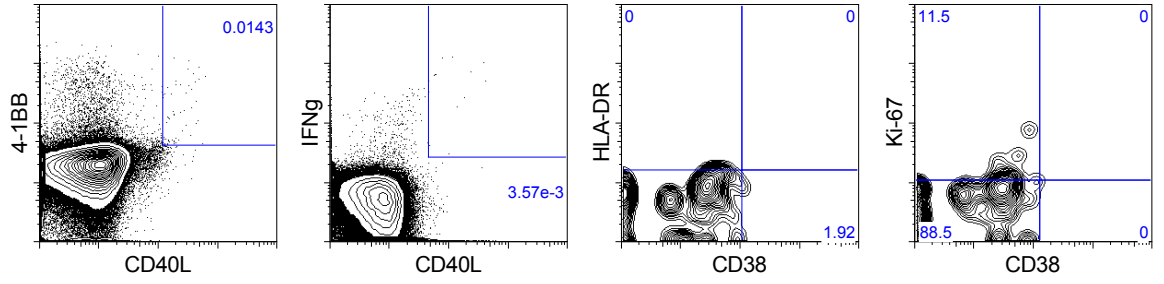

**HD36  
S-II (C-term)**

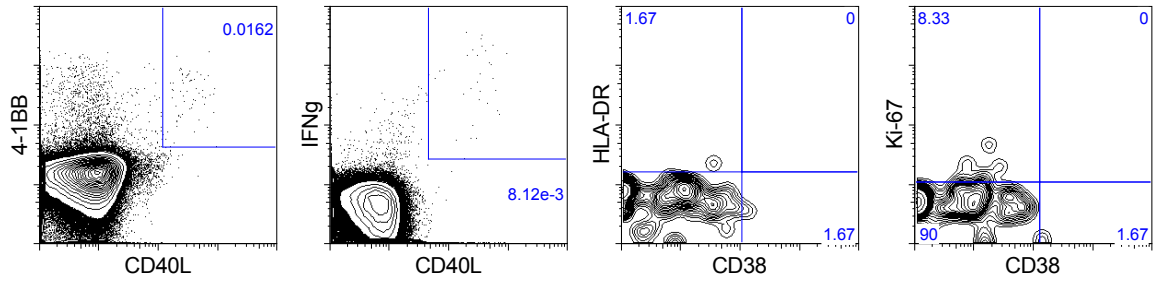

**HD36  
CMVpp65**

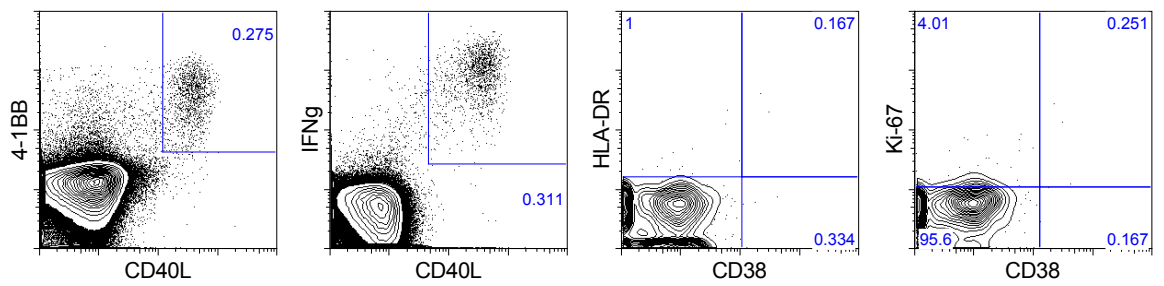

**HD36  
SEB/TSST1**

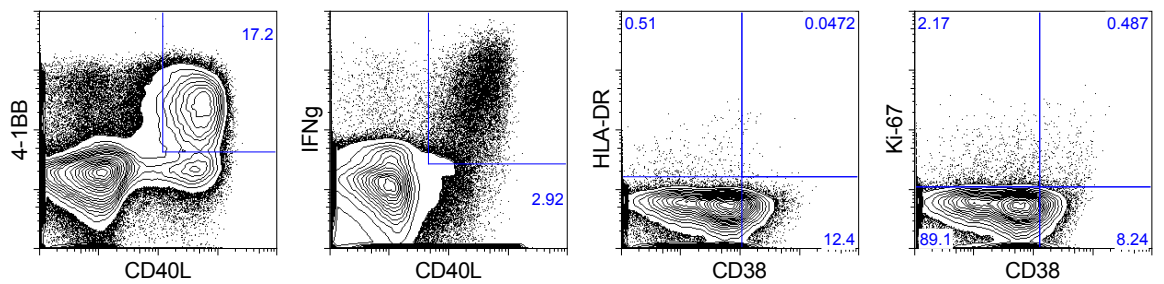

**HD37  
unstimulated**

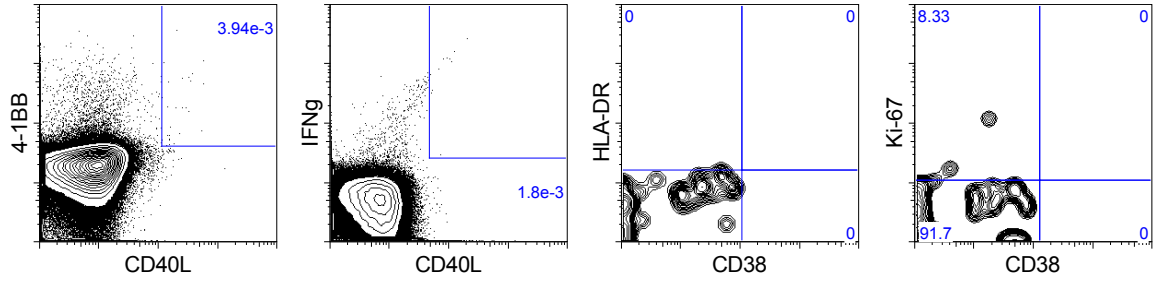

**HD37  
S-I (N-term)**

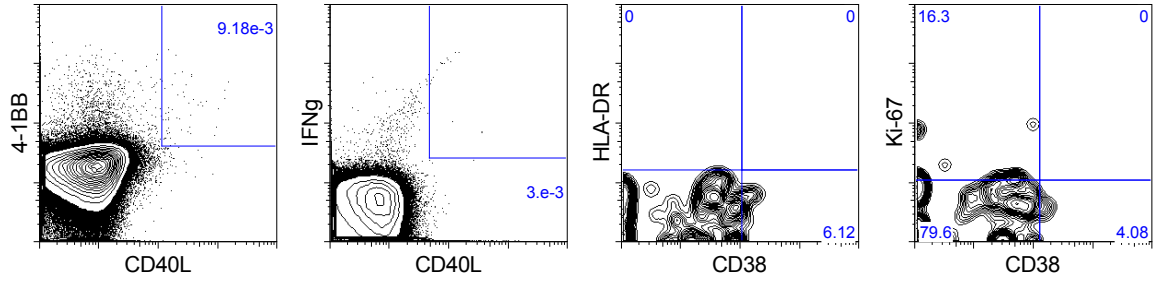

**HD37  
S-II (C-term)**

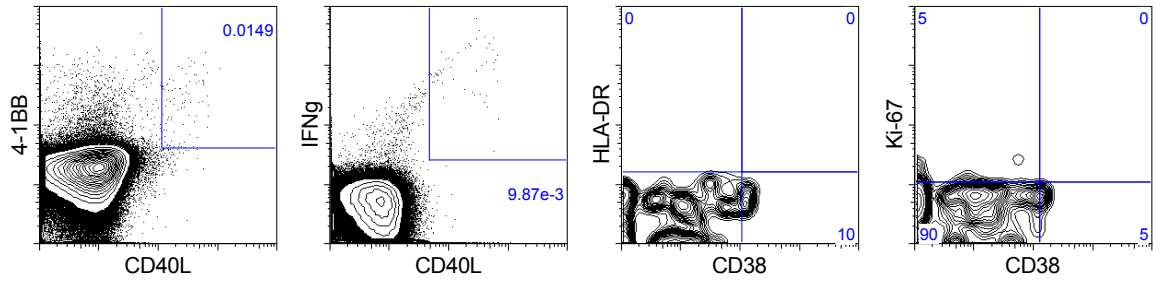

**HD37  
CMVpp65**

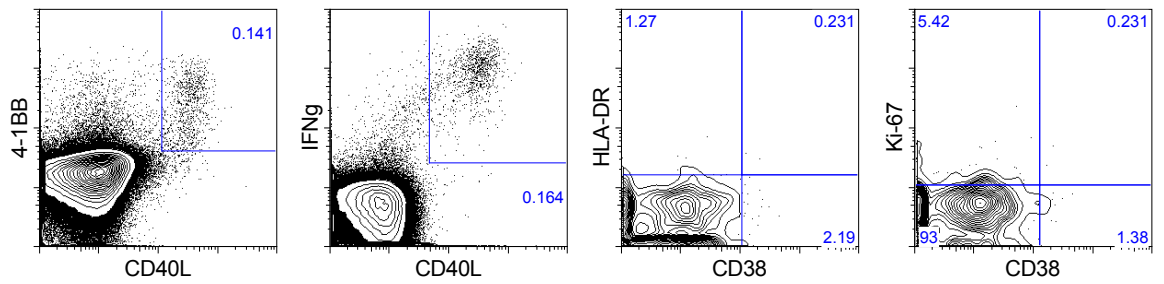

**HD37  
SEB/TSST1**

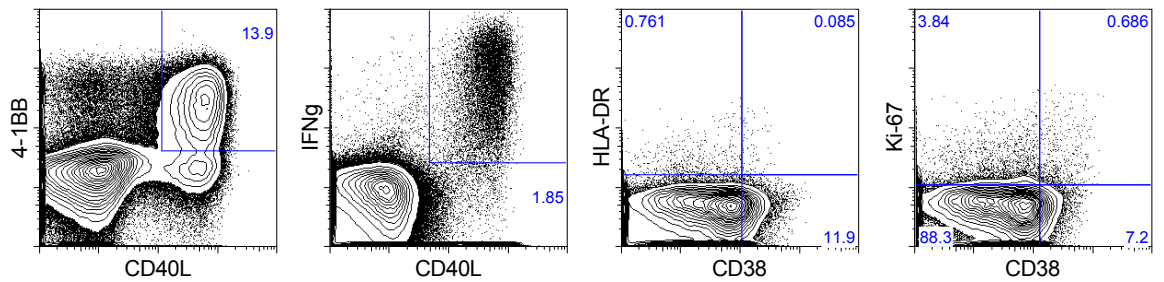

**HD38  
unstimulated**

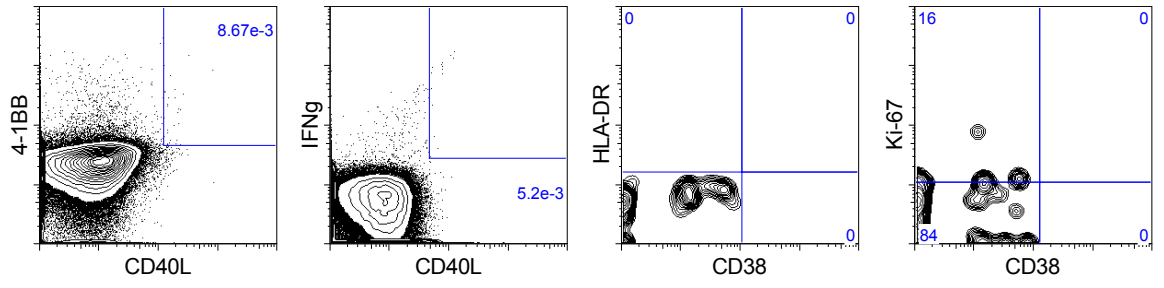

**HD38  
S-I (N-term)**

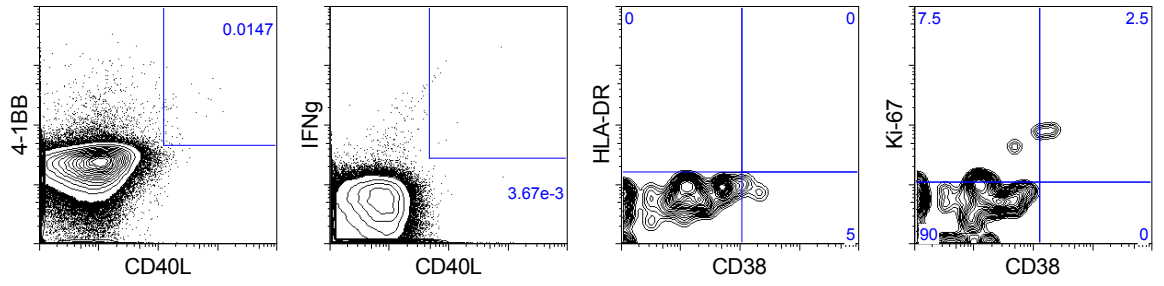

**HD38  
S-II (C-term)**

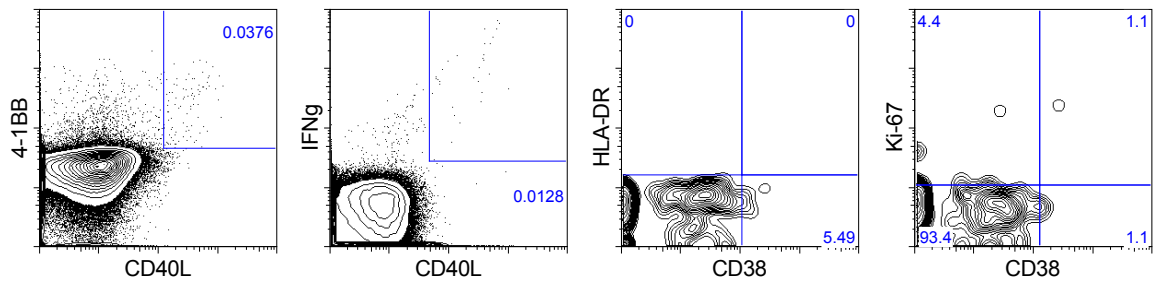

**HD38  
CMVpp65**

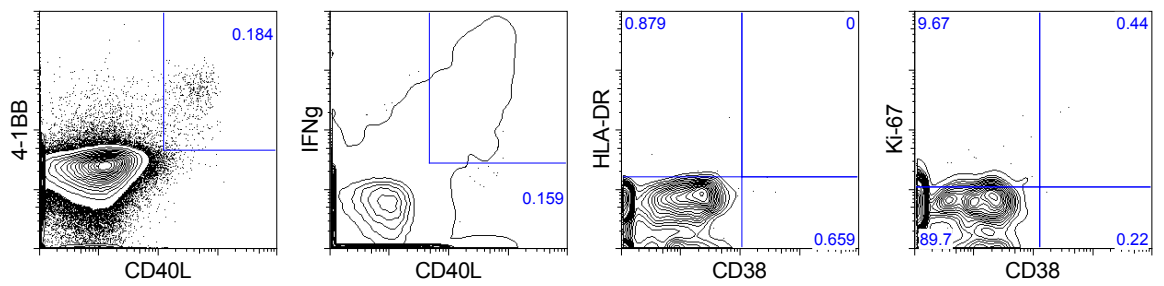

**HD38  
SEB/TSST1**

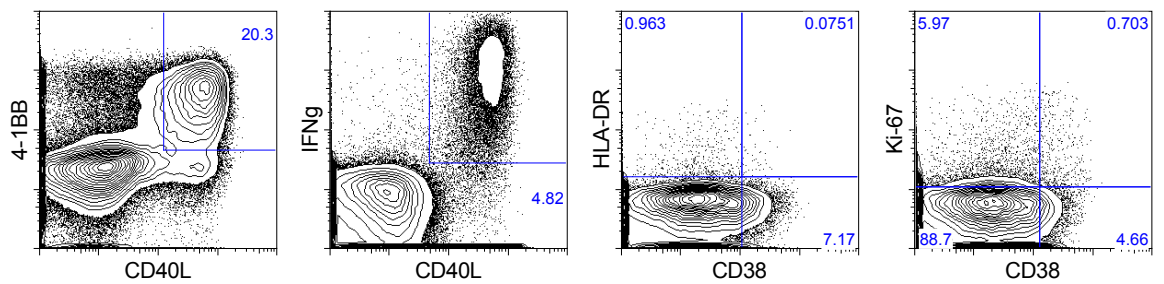

**HD39  
unstimulated**

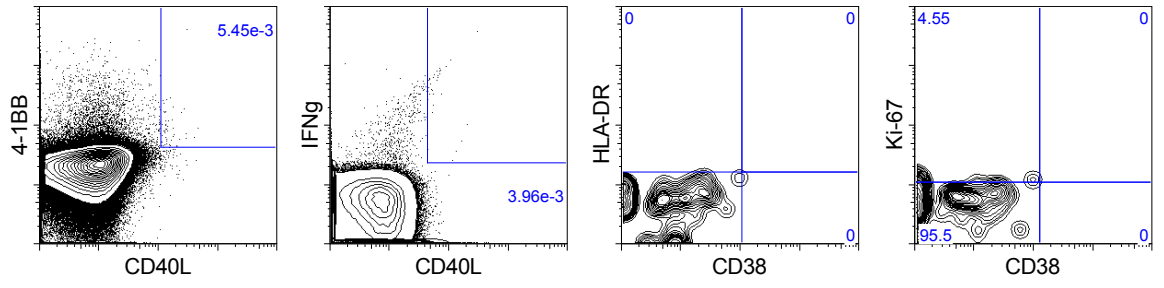

**HD39  
S-I (N-term)**

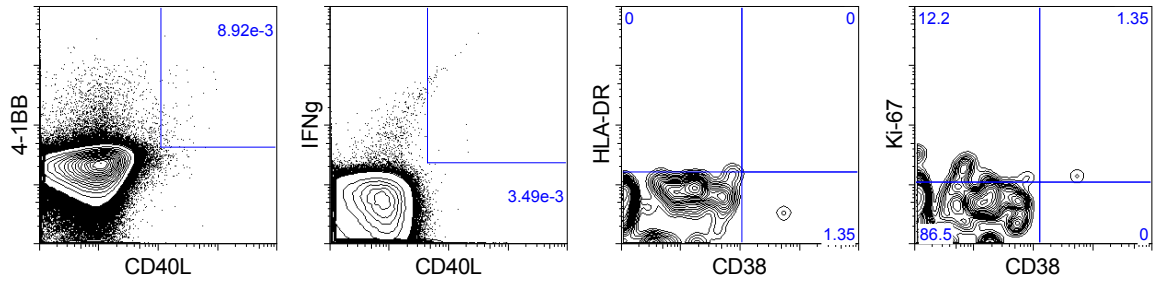

**HD39  
S-II (C-term)**

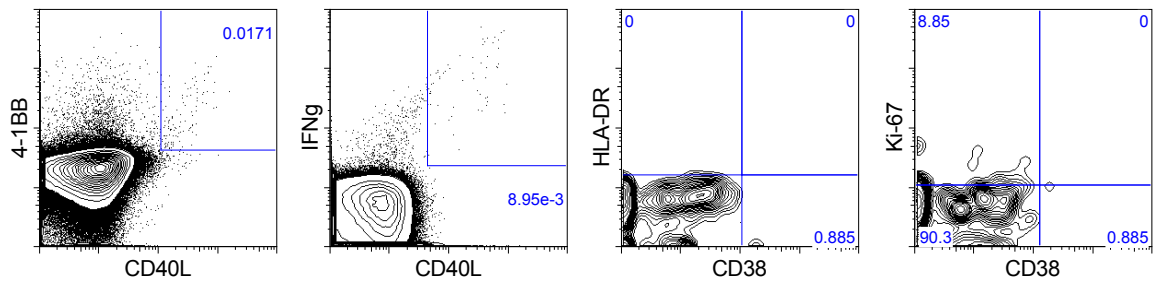

**HD39  
CMVpp65**

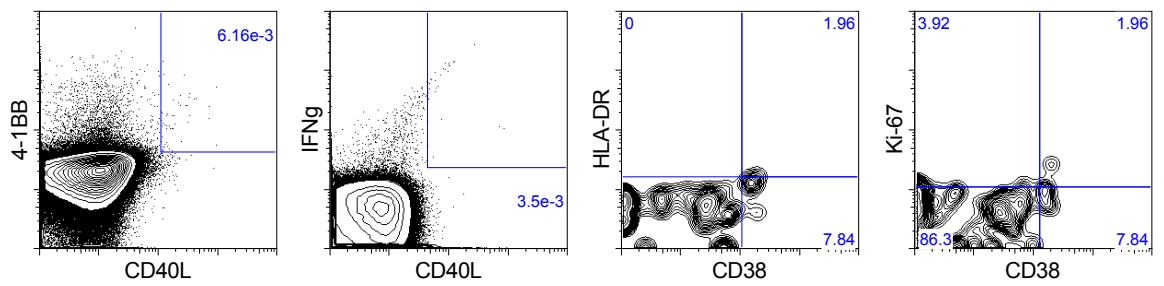

**HD39  
SEB/TSST1**

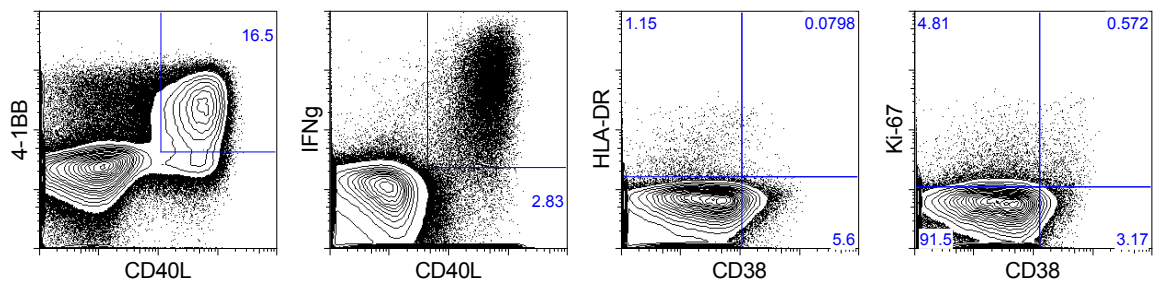

**HD41  
unstimulated**

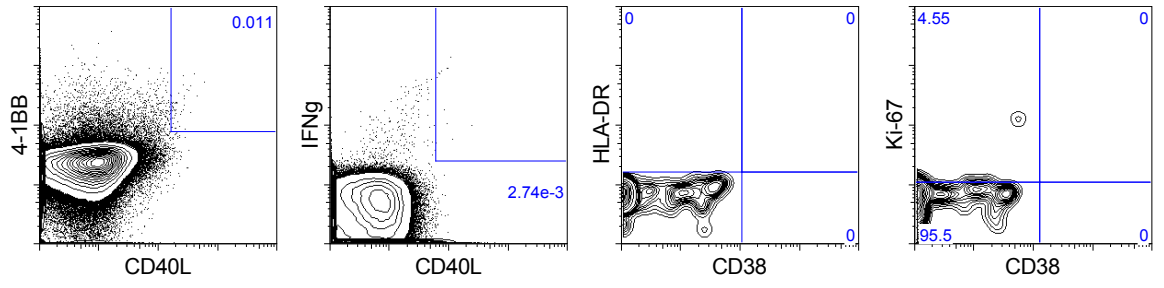

**HD41  
S-I (N-term)**

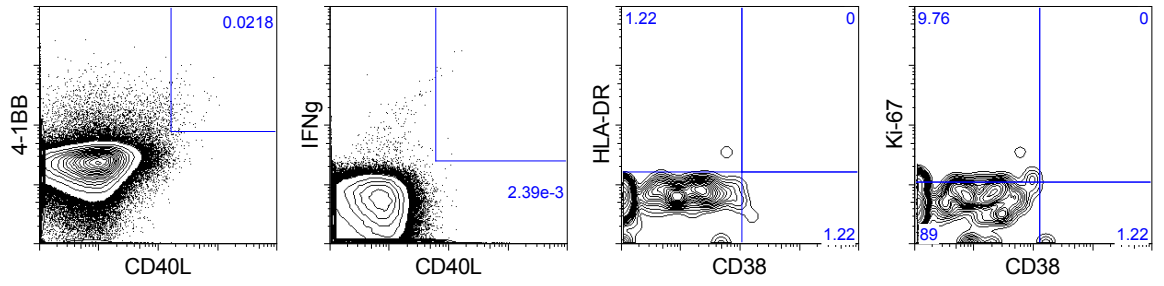

**HD41  
S-II (C-term)**

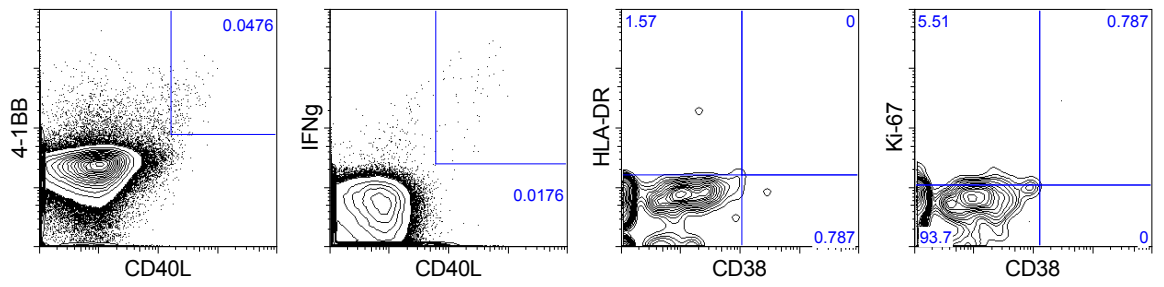

**HD41  
CMVpp65**

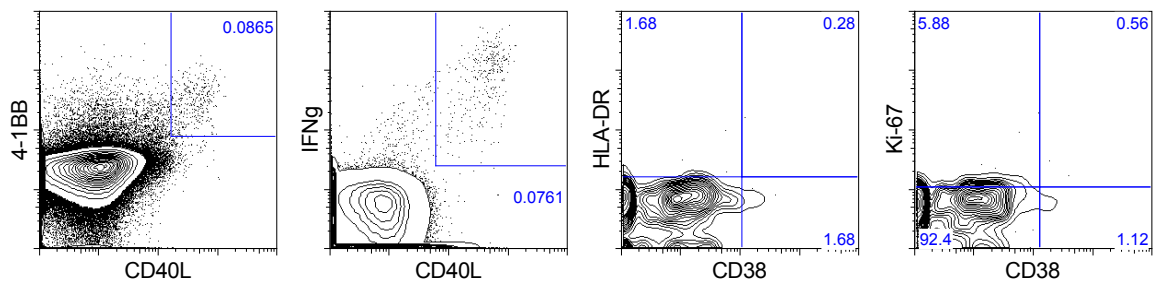

**HD41  
SEB/TSST1**

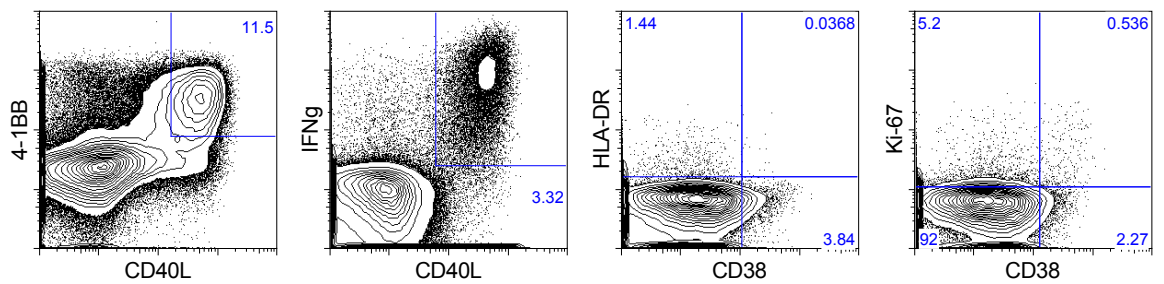



**HD43  
unstimulated**

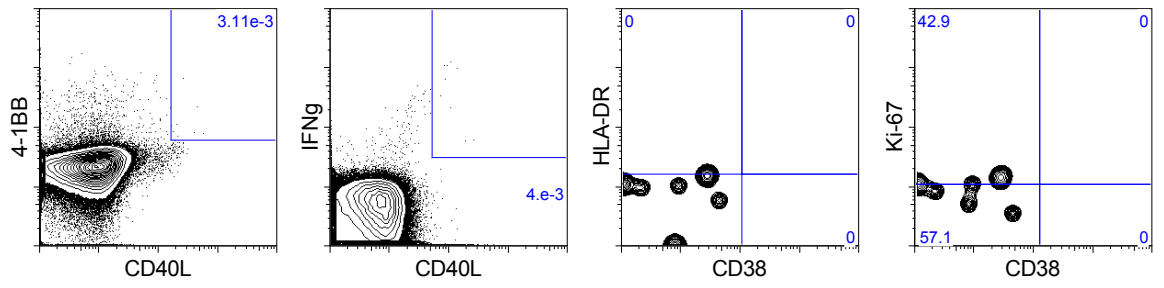

**HD43  
S-I (N-term)**

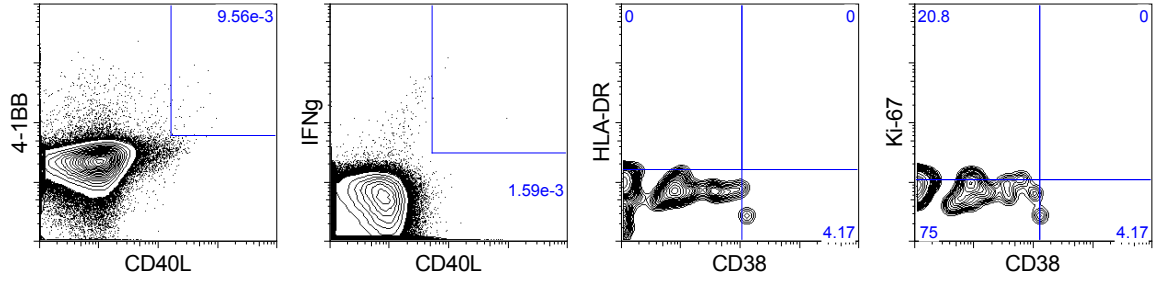

**HD43  
S-II (C-term)**

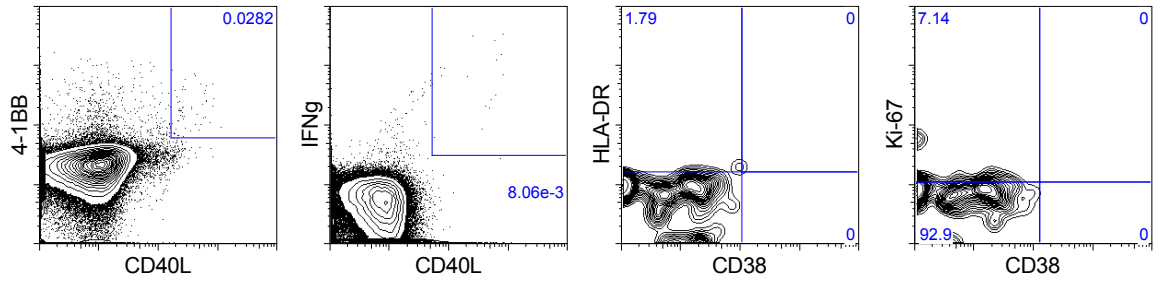

**HD43  
CMVpp65**

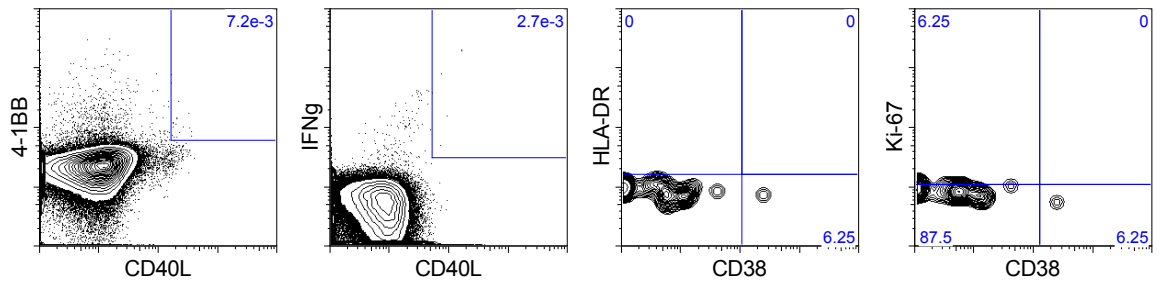

**HD43  
SEB/TSST1**

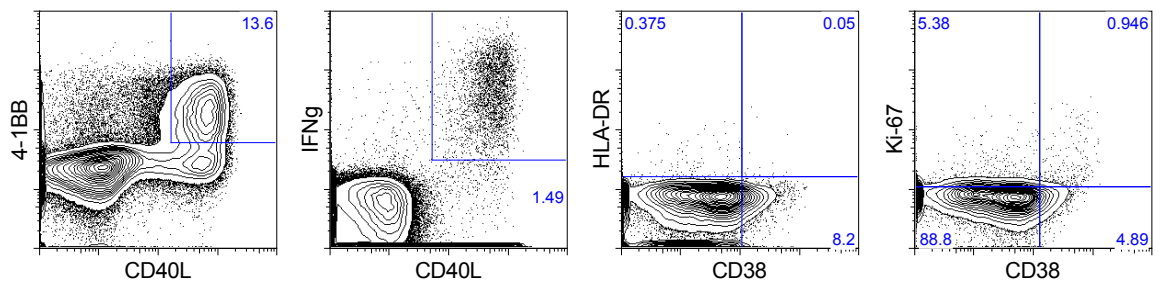



**HD44  
unstimulated**

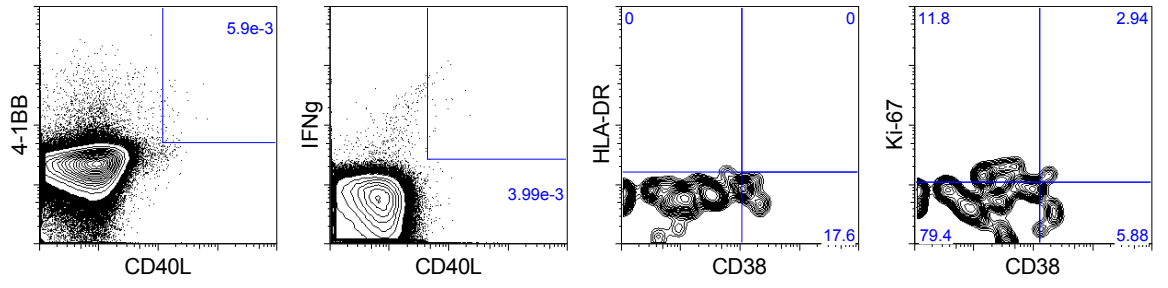

**HD44  
S-I (N-term)**

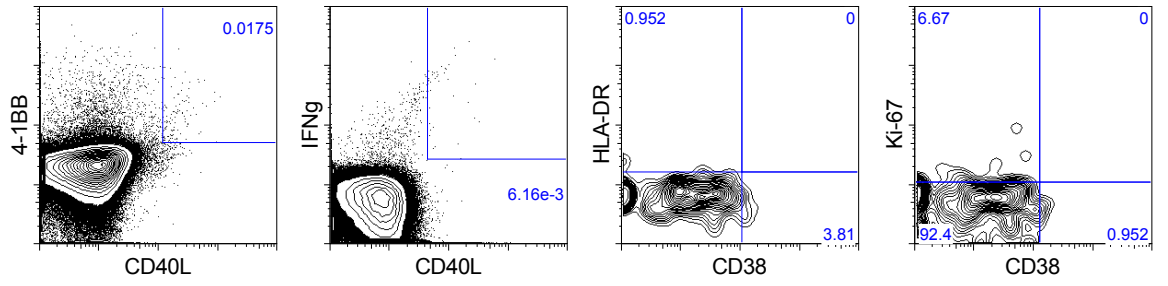

**HD44  
S-II (C-term)**

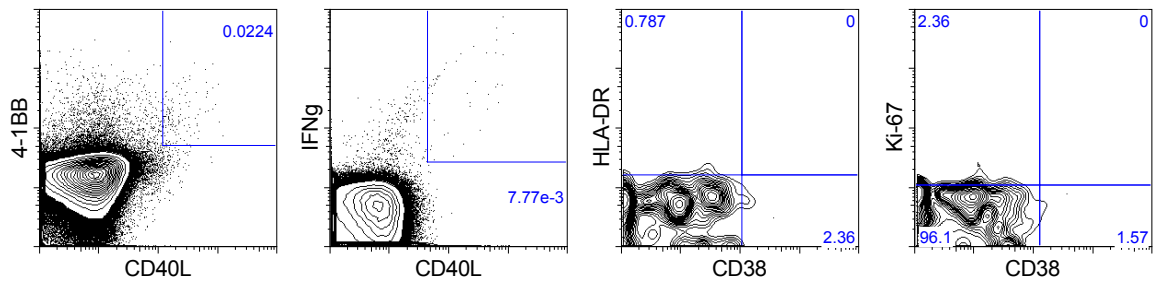

**HD44  
CMVpp65**

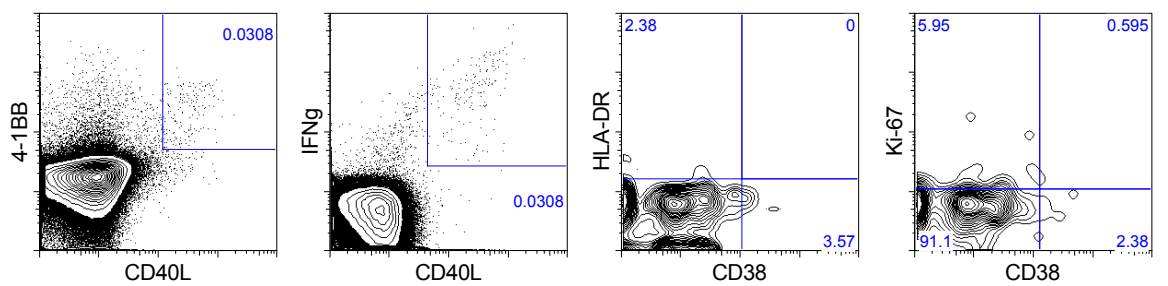

**HD44  
SEB/TSST1**

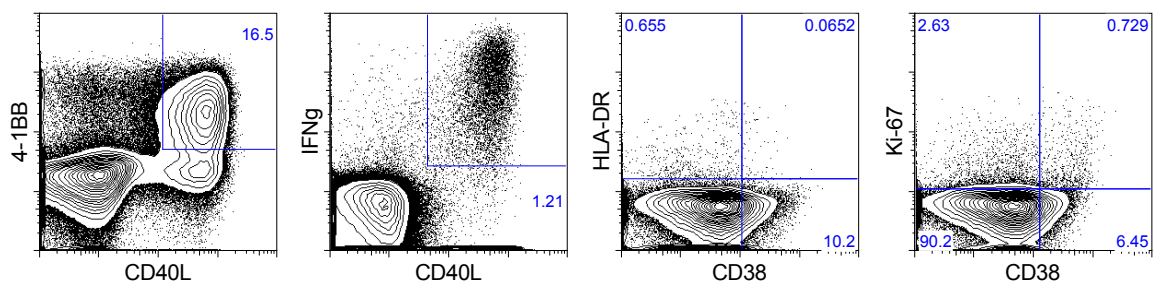

**HD45  
unstimulated**

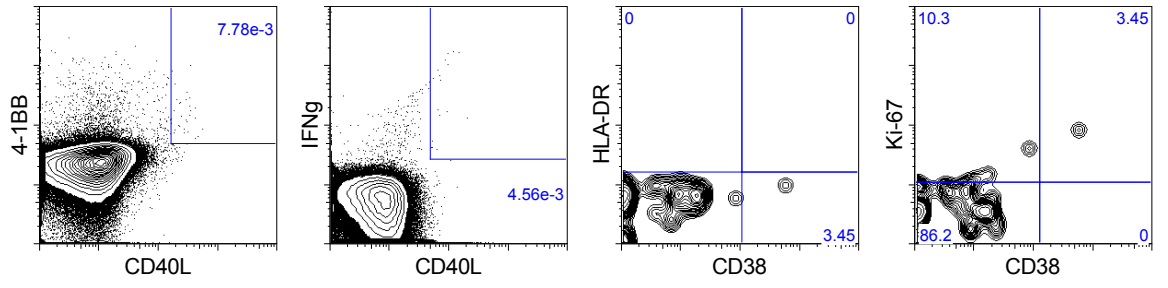

**HD45  
S-I (N-term)**

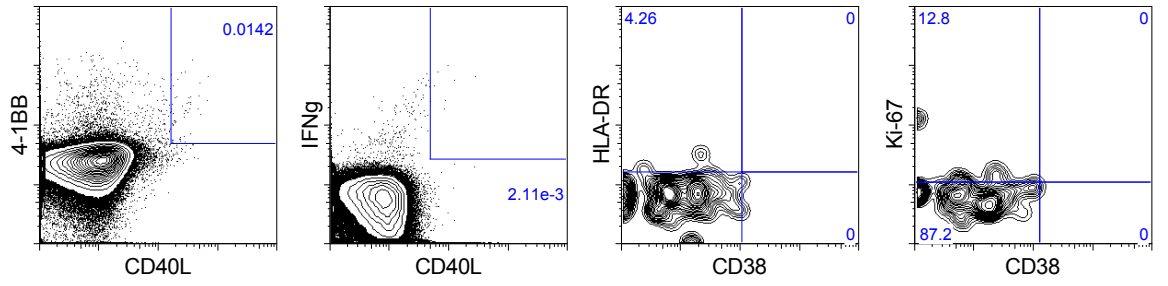

**HD45  
S-II (C-term)**

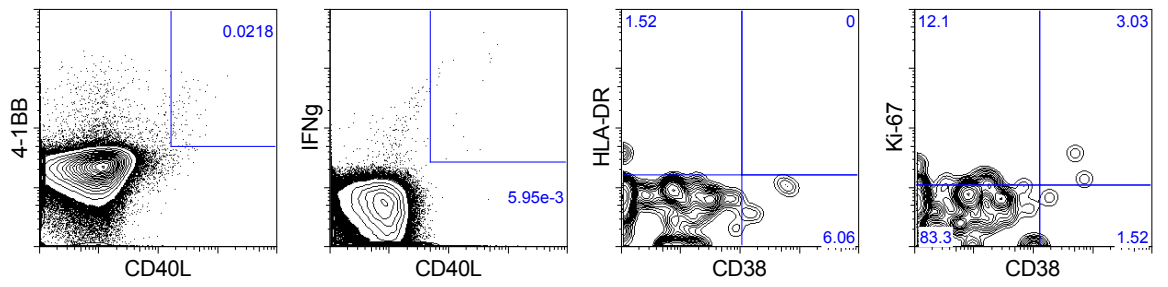

**HD45  
CMVpp65**

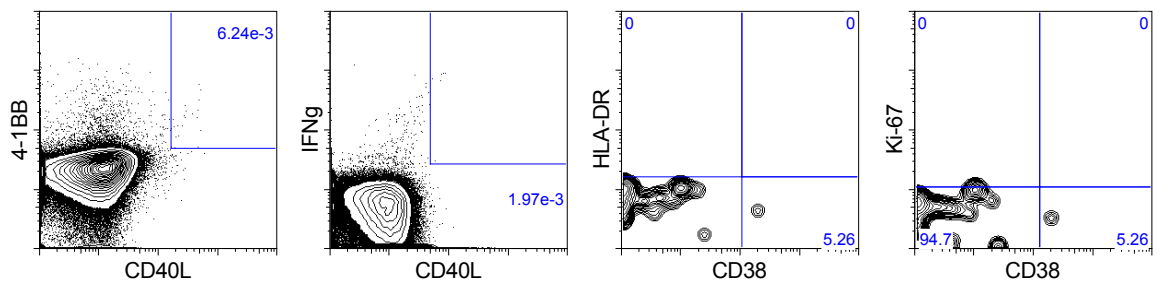

**HD45  
SEB/TSST1**

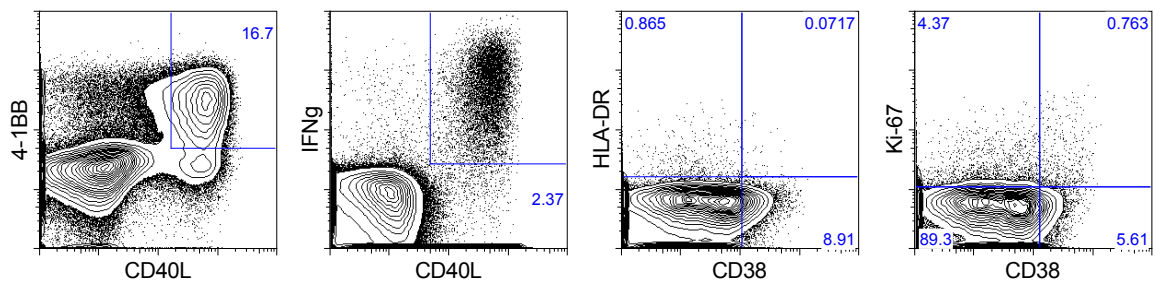

**HD54  
unstimulated**

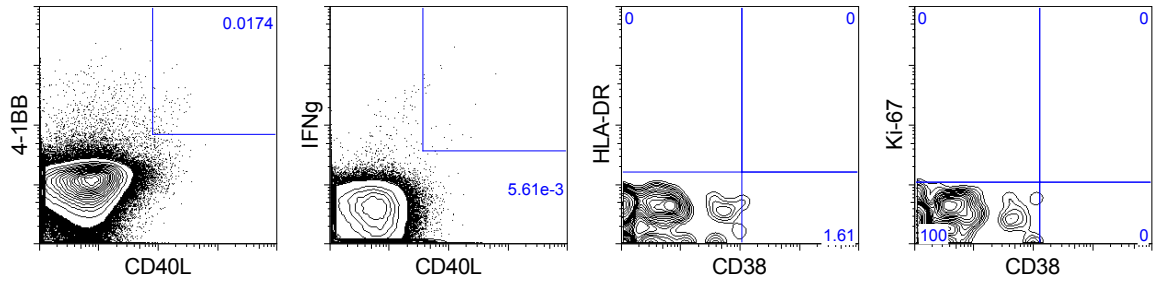

**HD54  
S-I (N-term)**

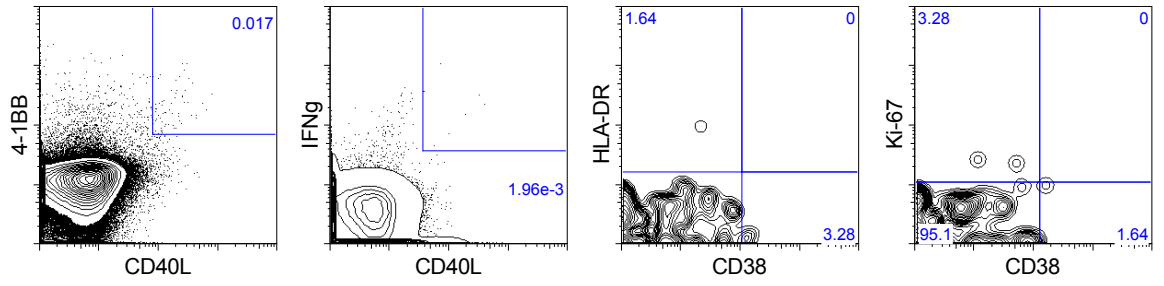

**HD54  
S-II (C-term)**

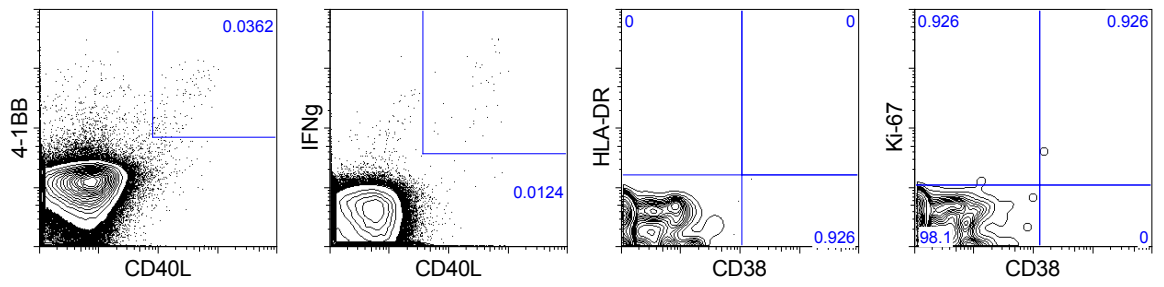

**HD54  
CMVpp65**

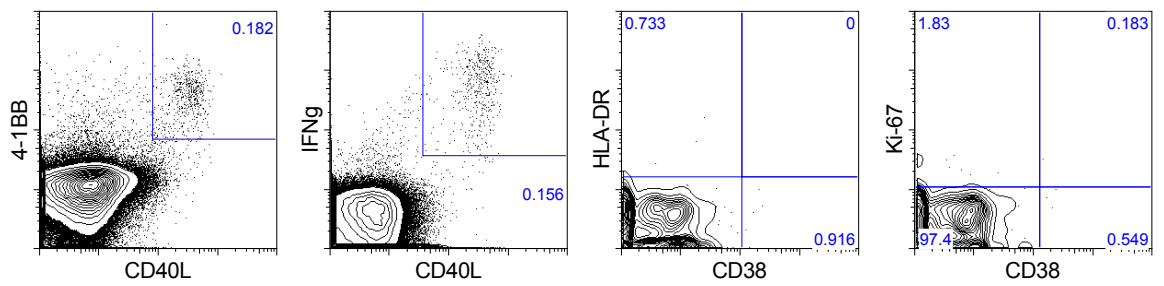

**HD54  
SEB/TSST1**

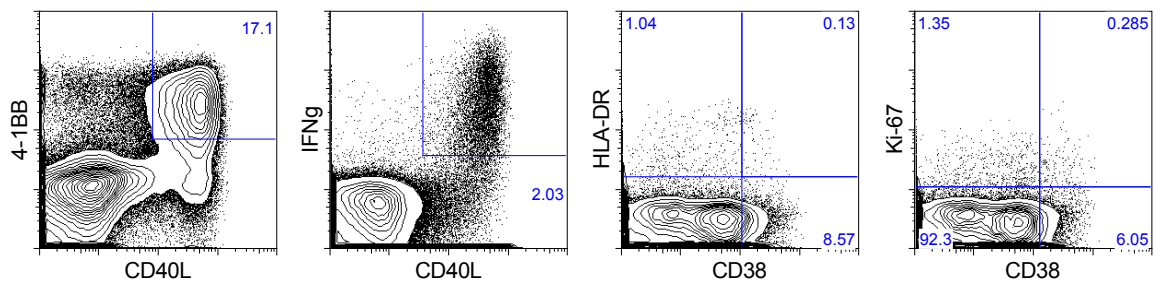

**HD60  
unstimulated**

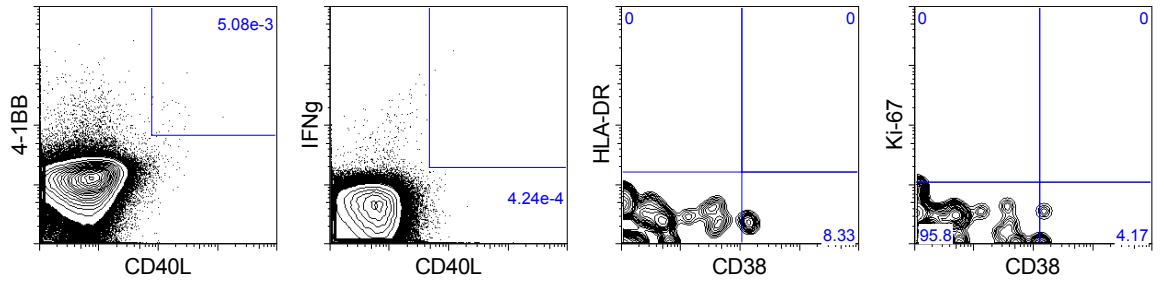

**HD60  
S-I (N-term)**

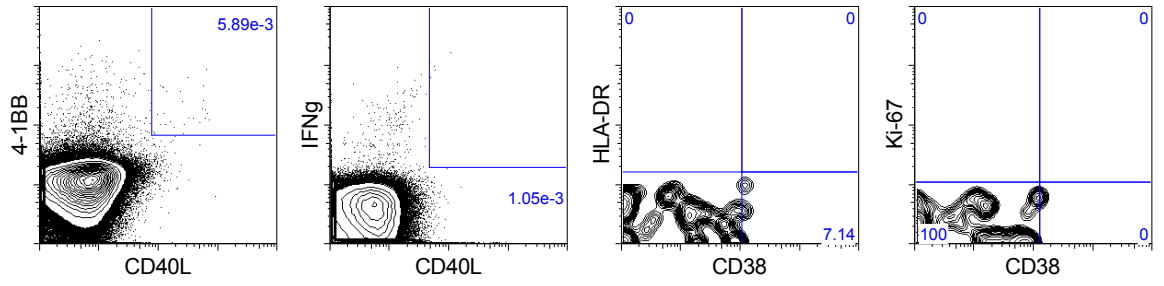

**HD60  
S-II (C-term)**

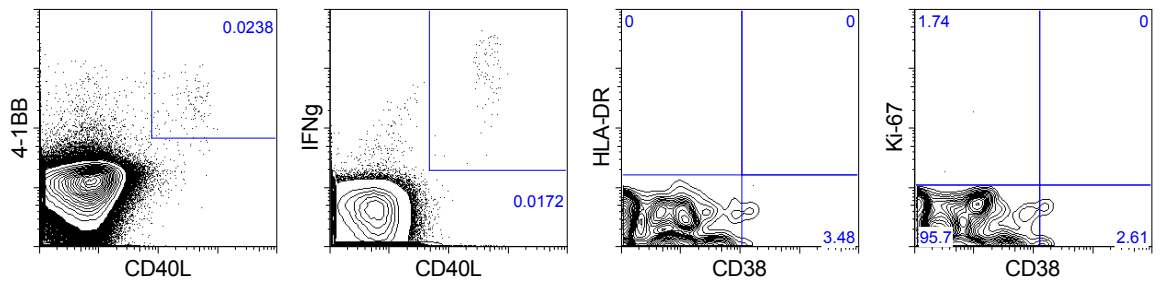

**HD60  
CMVpp65**

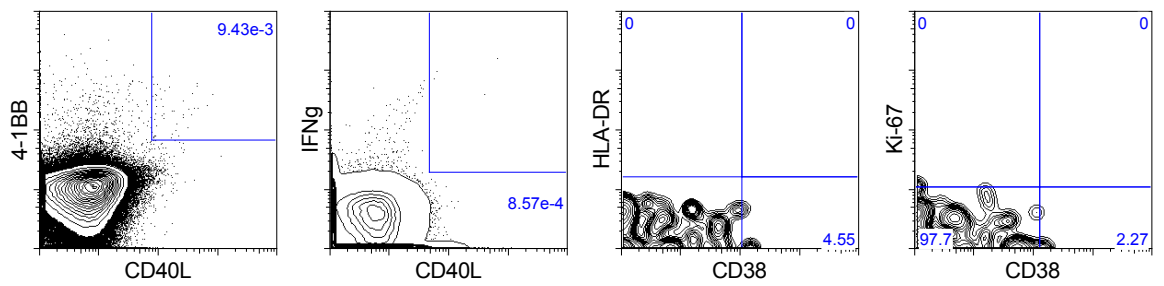

**HD60  
SEB/TSST1**

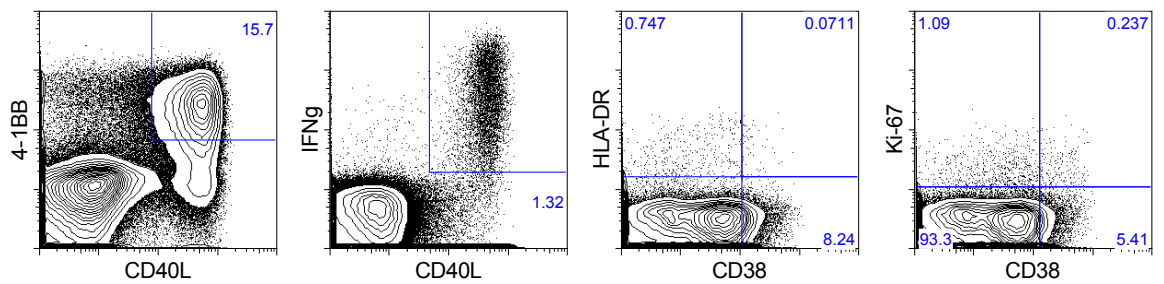

**HD71  
unstimulated**

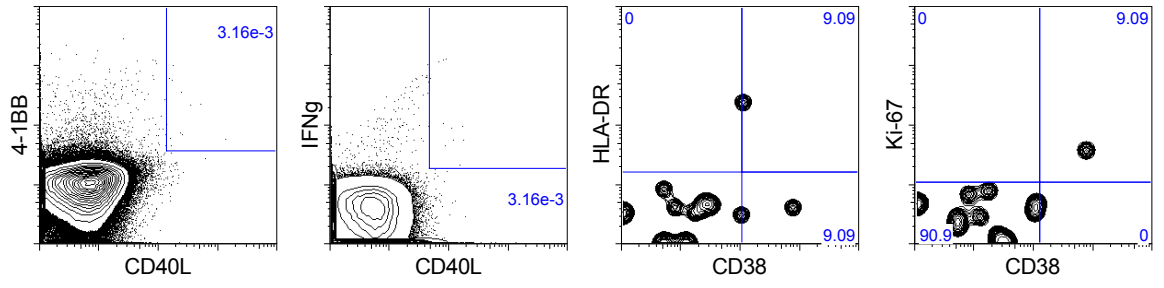

**HD71  
S-I (N-term)**

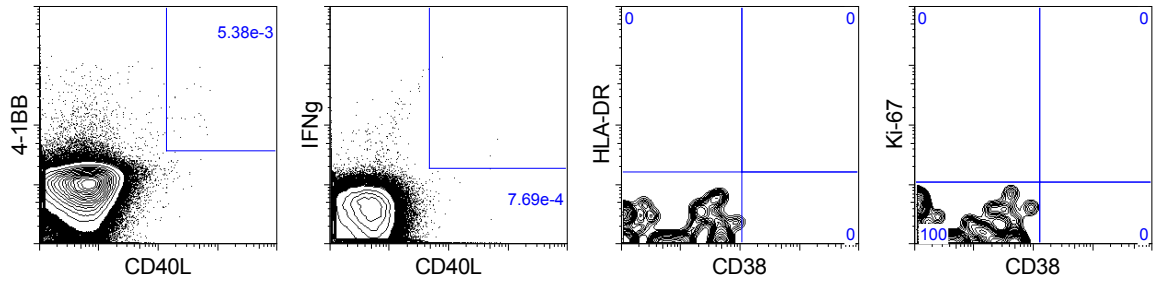

**HD71  
S-II (C-term)**

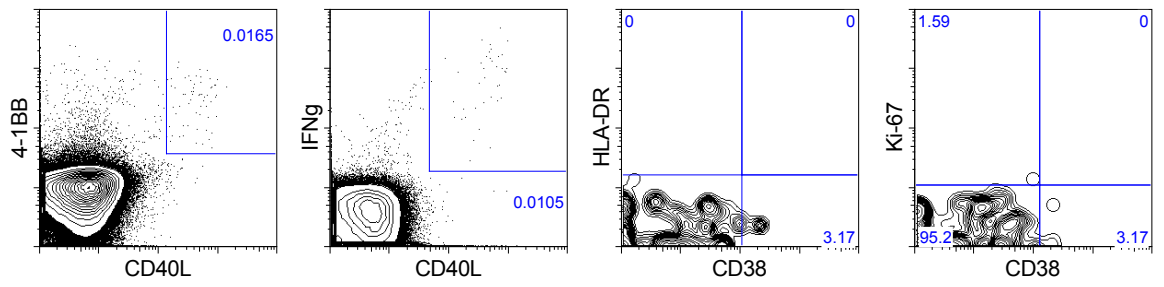

**HD71  
CMVpp65**

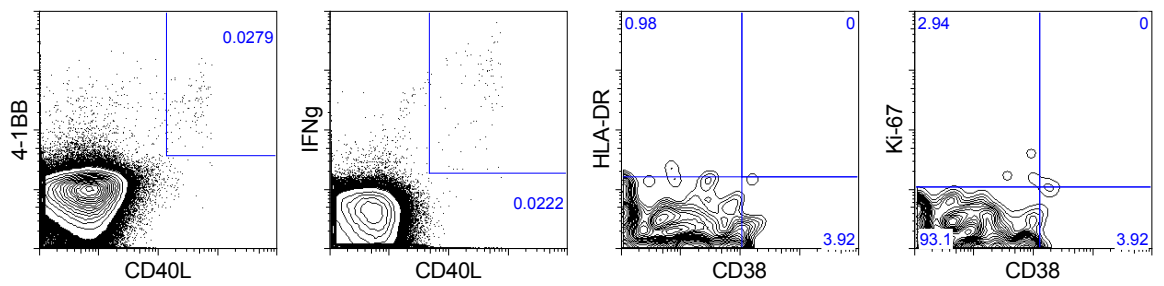

**HD71  
SEB/TSST1**

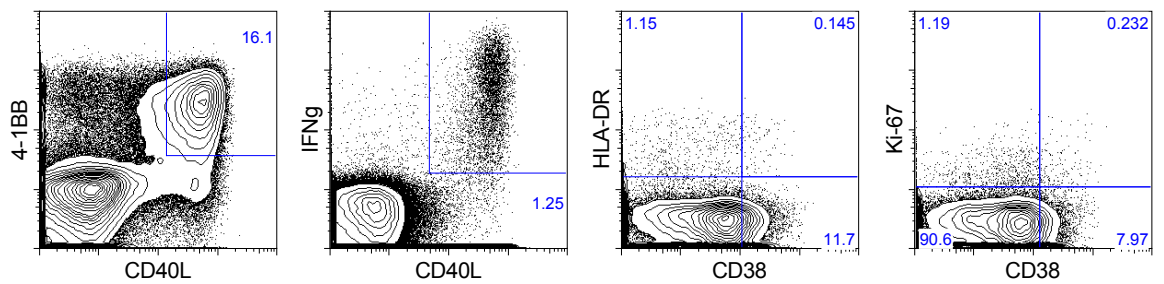

Supplement: 41586_2020_2598_MOESM1_ESM.pdf [file 41586_2020_2598_MOESM1_ESM.pdf]
