# Supplementary material for: SARS-CoV-2-reactive T cells in healthy donors and patients with COVID-19
Source: Springer Nature journal article supplement (doi:10.1038/s41586-020-2598-9), 2020-07-29
Supplement: 41586_2020_2598_MOESM2_ESM.pdf [file 41586_2020_2598_MOESM2_ESM.pdf]

## Reporting Summary

Nature Research wishes to improve the reproducibility of the work that we publish. This form provides structure for consistency and transparency in reporting. For further information on Nature Research policies, see [Authors & Referees](#) and the [Editorial Policy Checklist](#).

### Statistics

For all statistical analyses, confirm that the following items are present in the figure legend, table legend, main text, or Methods section.

n/a Confirmed

- |                                     |                                     |                                                                                                                                                                                                                                                            |
|-------------------------------------|-------------------------------------|------------------------------------------------------------------------------------------------------------------------------------------------------------------------------------------------------------------------------------------------------------|
| <input type="checkbox"/>            | <input checked="" type="checkbox"/> | The exact sample size ( $n$ ) for each experimental group/condition, given as a discrete number and unit of measurement                                                                                                                                    |
| <input type="checkbox"/>            | <input checked="" type="checkbox"/> | A statement on whether measurements were taken from distinct samples or whether the same sample was measured repeatedly                                                                                                                                    |
| <input type="checkbox"/>            | <input checked="" type="checkbox"/> | The statistical test(s) used AND whether they are one- or two-sided<br><i>Only common tests should be described solely by name; describe more complex techniques in the Methods section.</i>                                                               |
| <input checked="" type="checkbox"/> | <input type="checkbox"/>            | A description of all covariates tested                                                                                                                                                                                                                     |
| <input type="checkbox"/>            | <input checked="" type="checkbox"/> | A description of any assumptions or corrections, such as tests of normality and adjustment for multiple comparisons                                                                                                                                        |
| <input type="checkbox"/>            | <input checked="" type="checkbox"/> | A full description of the statistical parameters including central tendency (e.g. means) or other basic estimates (e.g. regression coefficient) AND variation (e.g. standard deviation) or associated estimates of uncertainty (e.g. confidence intervals) |
| <input checked="" type="checkbox"/> | <input type="checkbox"/>            | For null hypothesis testing, the test statistic (e.g. $F$ , $t$ , $r$ ) with confidence intervals, effect sizes, degrees of freedom and $P$ value noted<br><i>Give <math>P</math> values as exact values whenever suitable.</i>                            |
| <input checked="" type="checkbox"/> | <input type="checkbox"/>            | For Bayesian analysis, information on the choice of priors and Markov chain Monte Carlo settings                                                                                                                                                           |
| <input checked="" type="checkbox"/> | <input type="checkbox"/>            | For hierarchical and complex designs, identification of the appropriate level for tests and full reporting of outcomes                                                                                                                                     |
| <input type="checkbox"/>            | <input checked="" type="checkbox"/> | Estimates of effect sizes (e.g. Cohen's $d$ , Pearson's $r$ ), indicating how they were calculated                                                                                                                                                         |

*Our web collection on [statistics for biologists](#) contains articles on many of the points above.*

### Software and code

Policy information about [availability of computer code](#)

Data collection

Miltenyi MACSquantify software v2.13 was used for flow cytometry data collection.

Data analysis

All the softwares and there version information are shown her. FlowJo (v9.9.6) was used for all FACS analyses. Microsoft Excel (v.14.1.0) was used to collect and arrange data and patient / donor information. GraphPad Prism (v5.0b and v8.4.2. (464)) was used to analyze data and create plots.

Sequence alignments have been performed using R (v3.6.1) including package ClustalX (Larkin, M.A., Blackshields, G., Brown, N.P., Chenna, R., McGettigan, P.A., McWilliam, H., Valentin, F., Wallace, I.M., Wilm, A., Lopez, R., Thompson, J.D., Gibson, T.J., Higgins, D.G. (2007) Clustal W and Clustal X version 2.0. Bioinformatics, 23:2947-2948.) and using the Needleman-Wunsch algorithm.

For manuscripts utilizing custom algorithms or software that are central to the research but not yet described in published literature, software must be made available to editors/reviewers. We strongly encourage code deposition in a community repository (e.g. GitHub). See the Nature Research [guidelines for submitting code & software](#) for further information.

### Data

Policy information about [availability of data](#)

All manuscripts must include a [data availability statement](#). This statement should provide the following information, where applicable:

- Accession codes, unique identifiers, or web links for publicly available datasets
- A list of figures that have associated raw data
- A description of any restrictions on data availability

All flow cytometry data are made available in the FlowRepository.org (experiment ID: FR-FCM-Z2K3). An additional Supplementary Figure displaying the individual gating strategy for all donors is available in the online version of the paper.

## Field-specific reporting

Please select the one below that is the best fit for your research. If you are not sure, read the appropriate sections before making your selection.

Life sciences  Behavioural & social sciences  Ecological, evolutionary & environmental sciences

For a reference copy of the document with all sections, see [nature.com/documents/nr-reporting-summary-flat.pdf](https://www.nature.com/documents/nr-reporting-summary-flat.pdf)

## Life sciences study design

All studies must disclose on these points even when the disclosure is negative.

|                 |                                                                                                                                                                                                                                                                                                          |
|-----------------|----------------------------------------------------------------------------------------------------------------------------------------------------------------------------------------------------------------------------------------------------------------------------------------------------------|
| Sample size     | No sample size calculation was performed. Within COVID-19 patients, 83% exhibited T cell reactivity to the Spike glycoprotein of SARS-CoV2. Within the healthy donors recruited, 35% were identified as reactive healthy donors. With the proportions, the recruited numbers of subjects are sufficient. |
| Data exclusions | No data were excluded from the analysis.                                                                                                                                                                                                                                                                 |
| Replication     | We remeasured several donors (accompanied by anti-SARS-CoV-2 IgG antibody testing) at later timepoints and used another Spike glycoprotein peptide pool from Miltenyi to ensure reproducibility of T cell reactivity in SARS-CoV-2 naive donors.                                                         |
| Randomization   | No randomization was performed since it was not applicable to the study.                                                                                                                                                                                                                                 |
| Blinding        | Blinding was not applicable to this study.                                                                                                                                                                                                                                                               |

## Reporting for specific materials, systems and methods

We require information from authors about some types of materials, experimental systems and methods used in many studies. Here, indicate whether each material, system or method listed is relevant to your study. If you are not sure if a list item applies to your research, read the appropriate section before selecting a response.

### Materials & experimental systems

| n/a                                 | Involvement in the study                                        |
|-------------------------------------|-----------------------------------------------------------------|
| <input type="checkbox"/>            | <input checked="" type="checkbox"/> Antibodies                  |
| <input checked="" type="checkbox"/> | <input type="checkbox"/> Eukaryotic cell lines                  |
| <input checked="" type="checkbox"/> | <input type="checkbox"/> Palaeontology                          |
| <input checked="" type="checkbox"/> | <input type="checkbox"/> Animals and other organisms            |
| <input type="checkbox"/>            | <input checked="" type="checkbox"/> Human research participants |
| <input checked="" type="checkbox"/> | <input type="checkbox"/> Clinical data                          |

### Methods

| n/a                                 | Involvement in the study                           |
|-------------------------------------|----------------------------------------------------|
| <input checked="" type="checkbox"/> | <input type="checkbox"/> ChIP-seq                  |
| <input type="checkbox"/>            | <input checked="" type="checkbox"/> Flow cytometry |
| <input checked="" type="checkbox"/> | <input type="checkbox"/> MRI-based neuroimaging    |

## Antibodies

### Antibodies used

CD69-APCCy7 BioLegend Cat# 310914, RRID:AB\_314849  
 CD4-BV605 BioLegend Cat# 300556, RRID:AB\_2564391  
 CD8-PerCp BioLegend Cat# 344708, RRID:AB\_1967149  
 IFNg-AlexaFluor700 BioLegend Cat# 502520, RRID:AB\_528921  
 TNFa-PB BioLegend Cat# 502920, RRID:AB\_528965  
 CD38-PeVio770 Miltenyi Biotec Cat# 130-118-982, RRID:AB\_2751601  
 HLADR-VG Miltenyi Biotec Cat# 130-111-795, RRID:AB\_2652164  
 CD154-APC Miltenyi Biotec Cat# 130-113-603, RRID:AB\_2726191  
 CD137-PE BD Biosciences Cat# 555956, RRID:AB\_396252  
 CD154-BV421 BioLegend Cat# 310824, RRID:AB\_2562721  
 IL-2-APC BD Biosciences Cat# 341116, RRID:AB\_400574  
 IL-17A-APCCy7 BioLegend Cat# 512320, RRID:AB\_10613103  
 CCR7-AlexaFluor488 BioLegend Cat# 353206, RRID:AB\_10916389  
 CD45RA-PeCy7 BioLegend Cat# 304126, RRID:AB\_10708879  
 CD3-V500 BD Biosciences Cat# 560770, RRID:AB\_1937322

### Validation

All antibodies are established, well described and published elsewhere. Informations are accessible on the manufacturers websites under Catalogue or RRID numbers.

## Human research participants

Policy information about [studies involving human research participants](#)

|                            |                                                                                                                                                                                                                                                                                                                                                                                                                                                                                                                                           |
|----------------------------|-------------------------------------------------------------------------------------------------------------------------------------------------------------------------------------------------------------------------------------------------------------------------------------------------------------------------------------------------------------------------------------------------------------------------------------------------------------------------------------------------------------------------------------------|
| Population characteristics | The study included:<br>- 18 COVID-19 patients (Table 1): age mean 52.6, range: 21-81 yrs; gender: female ratio 27.8%; sampling day (post symptom onset): mean 14.9, range: 2-39<br>- 7 additional COVID-19 patients (Extended data Table 3): age mean 53, range: 10-79 yrs; gender: female ratio 14.3%; sampling day (post symptom onset): mean 31.6, range: 10-53<br>- 68 healthy donors (age mean 41.93, range: 20-64 yrs; gender: female ratio 59%)<br>All healthy donors stated to be free of symptoms indicating an acute infection. |
| Recruitment                | Patients were hospitalised in the Charité. The patients were selected based on the disease severity to achieve a balanced representation of the three disease severity groups.                                                                                                                                                                                                                                                                                                                                                            |
| Ethics oversight           | Institutional Review Board of the Charité.                                                                                                                                                                                                                                                                                                                                                                                                                                                                                                |

Note that full information on the approval of the study protocol must also be provided in the manuscript.

## Flow Cytometry

### Plots

Confirm that:

- The axis labels state the marker and fluorochrome used (e.g. CD4-FITC).
- The axis scales are clearly visible. Include numbers along axes only for bottom left plot of group (a 'group' is an analysis of identical markers).
- All plots are contour plots with outliers or pseudocolor plots.
- A numerical value for number of cells or percentage (with statistics) is provided.

### Methodology

|                           |                                                                                                                                                                                                                                                                                                                                                                                                                                                                                                                                                                                                                                                                                                                                                                                                                                                                                                                                                                                                                                                                                                                                                                                                                                                                                                                                                                                                                                                                                                                                                                                                                                                                                                                                                                                                                                                                                                                                                                                                                                                                                                                                                                                                                                                                                                                                                                                                                                                                                                                                                                                                                                                                                                                                                                                                                                                                                                                                                                         |
|---------------------------|-------------------------------------------------------------------------------------------------------------------------------------------------------------------------------------------------------------------------------------------------------------------------------------------------------------------------------------------------------------------------------------------------------------------------------------------------------------------------------------------------------------------------------------------------------------------------------------------------------------------------------------------------------------------------------------------------------------------------------------------------------------------------------------------------------------------------------------------------------------------------------------------------------------------------------------------------------------------------------------------------------------------------------------------------------------------------------------------------------------------------------------------------------------------------------------------------------------------------------------------------------------------------------------------------------------------------------------------------------------------------------------------------------------------------------------------------------------------------------------------------------------------------------------------------------------------------------------------------------------------------------------------------------------------------------------------------------------------------------------------------------------------------------------------------------------------------------------------------------------------------------------------------------------------------------------------------------------------------------------------------------------------------------------------------------------------------------------------------------------------------------------------------------------------------------------------------------------------------------------------------------------------------------------------------------------------------------------------------------------------------------------------------------------------------------------------------------------------------------------------------------------------------------------------------------------------------------------------------------------------------------------------------------------------------------------------------------------------------------------------------------------------------------------------------------------------------------------------------------------------------------------------------------------------------------------------------------------------------|
| Sample preparation        | Peripheral blood mononuclear cells (PBMC) were isolated from heparinized whole blood by gradient density centrifugation according to manufacturer's instructions (Leucosep tubes, Greiner; Biocoll, Bio&SELL). Stimulation was conducted with 5x10 <sup>6</sup> PBMC in RPMI 1640 medium (Gibco) supplemented with 10% heat inactivated AB serum (Pan Biotech), 100 U/ml penicillin (Biochrom), 0.1 mg/ml streptomycin (Biochrom), and PepMix <sup>TM</sup> SARS-CoV-2 in the presence of 1 µg/ml purified anti-CD28 (clone CD28.2, BD Biosciences). PepMix <sup>TM</sup> SARS-CoV-2 (Spike Glycoprotein) subpool 1 covering the N-terminal aa 1-643 (abbreviated to "S-I (N-term)") containing 158 15-mers overlapping by 11 and PepMix <sup>TM</sup> SARS-CoV-2 (Spike Glycoprotein) subpool 2 covering the C-terminal aa 633-1273 (abbreviated to "S-II (C-term)") (JPT) containing 156 15-mers overlapping by 11 and one 17-mer at C-terminus were used at 1 µg/ml per peptide, respectively. Stimulation controls were performed with equal concentrations of DMSO in PBS (unstimulated) or 1.5 mg SEB/1.0 mg TSST1 (Sigma-Aldrich) and PepMix <sup>TM</sup> CMV pp65 (Miltenyi) as positive controls, respectively. Incubation was performed at 37°C, 5% CO <sub>2</sub> for 14h with 10 µg/ml brefeldin A (Sigma-Aldrich) added after 2 h. Stimulation was stopped by incubation in 20 mM EDTA for 5 min and surface staining conducted for 15 min with the following fluorochrome conjugated antibodies titrated to their optimal concentrations: CD38-PE-Vio770 (clone REA671, Miltenyi), CD69-APC-Cy7 (FN50, Biolegend), HLAD-DR-VioGreen (REA805, Miltenyi), CD4-BrilliantViolet605 (RPA-T4, Biolegend), CD8-PerCP (SK1, Biolegend) with 1 mg/ml Beriglobin (CSL Behring) added prior to the staining. For exclusion of dead cells, Zombie Yellow fixable viability staining (Biolegend) was added for the last 10 min of incubation. Fixation and permeabilization were performed with eBioscience <sup>TM</sup> FoxP3 fixation and PermBuffer (Invitrogen) according to the manufacturer's protocol and intracellular staining carried out for 30 min in the dark at room temperature with Beriglobin added prior to intracellular staining with 4-1BB-PE (clone 4B4-1, BD), CD40L-APC (5C8, Miltenyi) and Ki-67-AlexaFluor488 (B56, BD). For intracellular cytokine staining, we employed different antibodies. Surface staining was performed with CD3-V500 (SP34-2, BD), CD8-PerCP (SK1, Biolegend), CD4-BrilliantViolet605 (RPA-T4, Biolegend), CCR7-AlexaFluor488 (G043H7, Biolegend), CD45RA-PE-Cy7 (HI100, Biolegend). IFN-γ-AlexaFluor700, CD40L-BrilliantViolet421 (24-31, Biolegend), IL-2-APC (5344.111, BD), 4-1BB-PE (4B4-1, BD) and IL-17A-APC-Cy7 (BL168, Biolegend) were utilized for intracellular staining after fixation and permeabilization using BD FACSLysing Buffer and BD Perm2 Buffer, according to manufacturer's instructions. |
| Instrument                | Samples were measured on a MACSQuant <sup>®</sup> Analyzer 16 and the instrument performance monitored daily with Rainbow Calibration Particles (BD).                                                                                                                                                                                                                                                                                                                                                                                                                                                                                                                                                                                                                                                                                                                                                                                                                                                                                                                                                                                                                                                                                                                                                                                                                                                                                                                                                                                                                                                                                                                                                                                                                                                                                                                                                                                                                                                                                                                                                                                                                                                                                                                                                                                                                                                                                                                                                                                                                                                                                                                                                                                                                                                                                                                                                                                                                   |
| Software                  | Miltenyi MACSquantif software (v2.13) and FlowJo (v9.9.6)                                                                                                                                                                                                                                                                                                                                                                                                                                                                                                                                                                                                                                                                                                                                                                                                                                                                                                                                                                                                                                                                                                                                                                                                                                                                                                                                                                                                                                                                                                                                                                                                                                                                                                                                                                                                                                                                                                                                                                                                                                                                                                                                                                                                                                                                                                                                                                                                                                                                                                                                                                                                                                                                                                                                                                                                                                                                                                               |
| Cell population abundance | Cells have not been enriched or sorted, except by the generation of SARS-CoV-2-S-II reactive CD4 T cell lines. Data are shown within ex vivo stimulated peripheral blood mononuclear cells.                                                                                                                                                                                                                                                                                                                                                                                                                                                                                                                                                                                                                                                                                                                                                                                                                                                                                                                                                                                                                                                                                                                                                                                                                                                                                                                                                                                                                                                                                                                                                                                                                                                                                                                                                                                                                                                                                                                                                                                                                                                                                                                                                                                                                                                                                                                                                                                                                                                                                                                                                                                                                                                                                                                                                                             |
| Gating strategy           | All recorded events were gated according to FSC and SSC as lymphocytes; single cells were further selected using FSC-H vs. FSC-W and again using SSC-H vs. SSC-W. Subsequently living cells were identified as ZombieYellow negative cells gated against CD4-BV605. An artefact population in some samples (probably induced by DMSO) was observed disturbing data analysis and was gated out using V500 vs V450. The subsequent gating scheme is depicted in Fig.2a and Fig. 3a.                                                                                                                                                                                                                                                                                                                                                                                                                                                                                                                                                                                                                                                                                                                                                                                                                                                                                                                                                                                                                                                                                                                                                                                                                                                                                                                                                                                                                                                                                                                                                                                                                                                                                                                                                                                                                                                                                                                                                                                                                                                                                                                                                                                                                                                                                                                                                                                                                                                                                       |

- Tick this box to confirm that a figure exemplifying the gating strategy is provided in the Supplementary Information.
